# Supplementary material for: Characterization of Fatty Acid Metabolism-Related Genes Landscape for Predicting Prognosis and Aiding Immunotherapy in Glioma Patients
Source: Front Immunol. 2022 Jul 12;13:902143. doi: 10.3389/fimmu.2022.902143 (PMC9315048; doi:10.3389/fimmu.2022.902143)
Supplement: Supplementary Table 1 — The gene collections were gathered for the prior study’s assessment of immune-related aspects in TME. [file Table_1.xlsx]

## Sheet: Table S1
Activated_CD8_T_cell	ADRM1	AHSA1	C1GALT1C1	CCT6B	CD37	CD3D	CD3E	CD3G	CD69	CD8A	CETN3	CSE1L	GEMIN6	GNLY	GPT2	GZMA	GZMH	GZMK	IL2RB	LCK	MPZL1	NKG7	PIK3IP1	PTRH2	TIMM13	ZAP70
Central_memory_CD8_T_cell	ACTN4	ADAM12	ADCY9	F13A1	FCER1G	FCGR3B	FGF7	FKBP4	GLUD1	GM2A	GUSB	IL1RN	NOL11	NTRK1	RARA	RNF128	SIGLEC1	TNFRSF11A	TOX4	UBA52	ULBP1
Effector_memeory_CD8_T_cell	ACAP1	APOL3	ARHGAP10	ATP10D	C3AR1	CCR5	CD160	CD55	CFLAR	CMKLR1	DAPP1	FCRL6	FLT3LG	GZMM	HAPLN3	HLA-DMB	HLA-DPA1	HLA-DPB1	IFI16	LIME1	LTK	NFKBIA	SETD7	SIK1	TRIB2
Activated_CD4_T_cell	AIM2	BIRC3	BRIP1	CCL20	CCL4	CCL5	CCNB1	CCR7	DUSP2	ESCO2	ETS1	EXO1	EXOC6	IARS	ITK	KIF11	KNTC1	NUF2	PRC1	PSAT1	RGS1	RTKN2	SAMSN1	SELL	TRAT1
Central_memory_CD4_T_cell	ABHD3	AHNAK	ANXA2P2	AQP3	ATHL1	BMI1	BZW2	CD63	COL4A1	CYLD	ELMO2	FYN	GLIPR1	GSS	IFITM2	ITGB1	ITGB2	KLF5	LSP1	NDUFB9	PKM2	SFXN3	SIRPG	SMAD4	STX4	TRADD	VIM	XRCC6
Effector_memeory_CD4_T_cell	ATM	CASP3	CASQ1	CD300E	DARS	DOCK9	EXOSC9	EZH2	GDE1	IL34	NCOA4	NEFL	PDGFRL	PTGS1	REPS1	SCG2	SDPR	SIGLEC14	SIGLEC6	TAL1	TFEC	TIPIN	TPK1	UQCRB	USP9Y	WIPF1	ZCRB1
T_follicular_helper_cell	B3GAT1	CDK5R1	PDCD1	BCL6	CD200	CD83	CD84	FGF2	GPR18	CEBPA	CECR1	CLEC10A	CLEC4A	CSF1R	CTSS	DMN	DPP4	LRRC32	MC5R	MICA	NCAM1	NCR2	NRP1	PDCD1LG2	PDCD6	PRDX1	RAE1	RAET1E	SIGLEC7	SIGLEC9	TYRO3	CHST12	CLIC3	IVNS1ABP	KIR2DL2	LGMN
Gamma_delta_T_cell	ACP5	AQP9	BTN3A2	C1orf54	CARD8	CCL18	CD209	CD33	CD36	CDK5	IL10RB	KLRF1	LGALS1	MAPK7	KLHL7	KRT80	LAMC1	LCORL	LMNB1	MEIS3P1	MPL	FABP1	FABP5	FADD	MFAP3L	MINPP1	RPS24	RPS7	RPS9	DBNL	CCL13
Type_1_T_helper_cell	CD70	TBX21	ADAM8	AHCYL2	ALCAM	B3GALNT1	BBS12	BST1	CD151	CD47	CD48	CD52	CD53	CD59	CD6	CD68	CD7	CD96	CFHR3	CHRM3	CLEC7A	COL23A1	COL4A4	COL5A3	DAB1	DLEU7	DOC2B	EMP1	F12	FURIN	GAB3	GATM	GFPT2	GPR25	GREM2	HAVCR1	HSD11B1	HUNK	IGF2	RCSD1	RYR1	SAV1	SELE	SELP	SH3KBP1	SIT1	SLC35B3	SIGLEC10	SKAP1
Type_17_T_helper_cell	IL17A	IL17RA	C2CD4A	C2CD4B	CA2	CCDC65	CEACAM3	IL17C	IL17F	IL17RC	IL17RE	IL23A	ILDR1	LONRF3	SH2D6	TNIP2	ABCA1	ABCB1	ADAMTS12	ANK1	ANKRD22	B3GALT2	CAMTA1	CCR9	CD40	GPR44	IFT80
Type_2_T_helper_cell	ASB2	CSRP2	DAPK1	DLC1	DNAJC12	DUSP6	GNAI1	LAMP3	NRP2	OSBPL1A	PDE4B	PHLDA1	PLA2G4A	RAB27B	RBMS3	RNF125	TMPRSS3	GATA3	BIRC5	CDC25C	CDC7	CENPF	CXCR6	DHFR	EVI5	GSTA4	HELLS	IL26	LAIR2
Regulatory_T_cell	CCL3L1	CD72	CLEC5A	FOXP3	ITGA4	L1CAM	LIPA	LRP1	LRRC42	MARCO	MMP12	MNDA	MRC1	MS4A6A	PELO	PLEK	PRSS23	PTGIR	ST8SIA4	STAB1
Activated_B_cell	ADAM28	CD180	CD79B	BLK	CD19	MS4A1	TNFRSF17	IGHM	GNG7	MICAL3	SPIB	HLA-DOB	IGKC	PNOC	FCRL2	BACH2	CR2	TCL1A	AKNA	ARHGAP25	CCL21	CD27	CD38	CLEC17A	CLEC9A	CLECL1
Immature__B_cell	CD22	CYBB	FAM129C	FCRL1	FCRL3	FCRL5	FCRLA	HDAC9	HLA-DQA1	HVCN1	KIAA0226	NCF1	NCF1B	P2RY10	SP100	TXNIP	STAP1	TAGAP	ZCCHC2
Memory_B_cell	AICDA	CCNA2	CDKN3	CLCN5	ENPP1	FCER1A	FCRL4	MYC	RUNX2	SORL1	SOX5	STAT5A	STAT5B	TLR9
Natural_killer_cell	AKT3	AXL	BST2	CDH2	CRTAM	CSF2RA	CTSZ	CXCL1	CYTH1	DAXX	DGKH	DLL4	DPYD	ERBB3	F11R	FAM27A	FAM49A	FASLG	FCGR1A	FN1	FSTL1	FUCA1	GBP3	GLS2	GRB2	LST1	BCL2	CDC5L	FGF18	FUT5	FZR1	GAGE2	IGFBP5	KANK2	LDB3
CD56bright_natural_killer_cell	ABAT	C11orf75	C5orf15	CDHR1	DCAF12	DYNLL1	GPR137B	HCP5	HDGFRP2	KRT86	MLST8	ELMOD3	ENTPD5	FAM119A	FAM179A	CLIC2	COX7A2L	CREB3L4	CSF1	CSNK2A2	CSTA	CSTB	CTPS	CTSD	FST	GATA2	GMPR	HDC	HEY1	HOXA1	HS2ST1	HS3ST1	BCL11B	CDH3	MYL6B	NAA16	ClQA	ClQB	CYP27B1	EIF3M
CD56dim_natural_killer_cell	CYP27A1	DDX55	DYRK2	RPL37A	NOTCH3	AKR7A3	GPRC5C	GRIN1	HLA-E	PORCN	PSMC4	UPP1	IL21R	KIR2DS1	KIR2DS2	KIR2DS5
Myeloid_derived_suppressor_cell	CCR2	CD14	CD2	CD86	CXCR4	FCGR2A	FCGR2B	FCGR3A	FERMT3	GPSM3	IL18BP	IL4R	ITGAL	ITGAM	PARVG	PSAP	PTGER2	PTGES2	S100A8	S100A9
Natural_killer_T_cell	BTN2A2	CD101	CD109	CNPY3	CNPY4	CREB1	CRTC2	CRTC3	CSF2	KLRC1	FUT4	ICAM2	IL32	LAMP2	LILRB5	KLRG1	HSPA4	HSPB6	ISM2	ITIH2	KDM4C	KIR2DS4	KIRREL3	SDCBP	NFATC2IP	MICB	KIR2DL1	KIR2DL3	KIR3DL1	KIR3DL2	NCR1	FOSL1	TSLP	SLC7A7	SPP1	TREM2	UBASH3A	YBX2	CCDC88A	CLEC1A	THBD	PDPN	VCAM1	EMR1
Activated_dendritic_cell	ABCD1	C1QC	CAPG	CCL3L3	CD207	CD302	ATP5B	ATP5L	ATP6V1A	BCL2L1	C1QB	SNURF	SPCS3	CCNA1	CEACAM8	NOS2	SRA1	TNFRSF6B	TREM1	TREML1	RHOA	SLC25A37	TNFSF14	TREML4	VNN2	XPO6	CLEC4C	TNFAIP2	UBD	ACTR3	RAB1A	SLA	HLA-DQA2	SIGLEC5	SLAMF9
Plasmacytoid_dendritic_cell	CBX6	DAB2	DDX17	HIGD1A	IDH3A	IL3RA	MAGED1	NUCB2	OFD1	OGT	PDIA4	SERTAD2	SIRPA	TMED2	ENG	FCAR	IGF1	ITGA2B	GABARAP	GPX1	KRT23	PROK2	RALB	RETNLB	RNF141	SEC14L1	SEPX1	EMP3	CD300LF	ABTB1	KLHL21	PHRF1
Immature_dendritic_cell	ACADM	AHCYL1	ALDH1A2	ALDH3A2	ALDH9A1	ALOX15	AMT	ARL1	ATIC	ATP5A1	CAPZA1	LILRA5	RDX	RRAGD	TACSTD2	INPP5F	RAB38	PLAU	CSF3R	SLC18A2	AMPD2	CLTB	C1orf162
Macrophage	AIF1	CCL1	CCL14	CCL23	CCL26	CD300LB	CNR1	CNR2	EIF1	EIF4A1	FPR1	FPR2	FRAT2	GPR27	GPR77	RNASE2	MS4A2	BASP1	IGSF6	HK3	VNN1	FES	NPL	FZD2	FAM198B	HNMT	SLC15A3	CD4	TXNDC3	FRMD4A	CRYBB1	HRH1	WNT5B
Eosinophil	GIPR	KRT18P50	LRMP	FOSB	RRP12	GPR183	NR4A3	ST3GAL6	DEPDC5	PDE6C	PKD2L2	GPR65	IL5RA	P2RY14	DACH1	DAPK2	EMR3
Mast_cell	ADAMTS3	CPA3	CMA1	CTSG	ARHGAP15	CPM	FCN1	FTL	HSPA6	ITGA9	RNASE3	S100A4	SIGLEC8	SLC6A4	PTGS2	EGR3	PILRA
Monocyte	ASGR2	CFP	ASGR1	CD1D	UPK3A	ACTG1	ANXA5	ATP6V1B2	CFL1	DAZAP2	CTBS	EMR4P	HIVEP2	MARCKSL1	MBP	MMP15	PNPLA6	TMBIM6	PQBP1	TEX264	IKZF1
Neutrophil	CREB5	CDA	CHST15	S100A12	APOBEC3A	CASP5	MMP25	HAL	C1orf183	FFAR2	MAK	CXCR1	STEAP4	MGAM	BTNL8	CXCR2	TNFRSF10C	VNN3
APC_co_inhibition	C10orf54	CD274	LGALS9	PDCD1LG2	PVRL3
APC_co_stimulation	CD40	CD58	CD70	ICOSLG	SLAMF1	TNFSF14	TNFSF15	TNFSF18	TNFSF4	TNFSF8	TNFSF9
CCR	CCL16	TPO	TGFBR2	CXCL2	CCL14	TGFBR3	IL11RA	CCL11	IL4I1	IL33	CXCL12	CXCL10	BMPER	BMP8A	CXCL11	IL21R	IL17B	TNFRSF9	ILF2	CX3CR1	CCR8	TNFSF12	CSF3	TNFSF4	BMP3	CX3CL1	BMP5	CXCR2	TNFRSF10D	BMP2	CXCL14	CCL28	CXCL3	BMP6	CCL21	CXCL9	CCL23	IL6	TNFRSF18	IL17RD	IL17D	IL27	CCL7	IL1R1	CXCR4	CXCR2P1	TGFB1I1	IFNGR1	IL9R
Check-point	IDO1	LAG3	CTLA4	TNFRSF9	ICOS	CD80	PDCD1LG2	TIGIT	CD70	TNFSF9	ICOSLG	KIR3DL1	CD86	PDCD1	LAIR1	TNFRSF8	TNFSF15	TNFRSF14	IDO2	CD276	CD40	TNFRSF4	TNFSF14	HHLA2	CD244	CD274	HAVCR2	CD27	BTLA	LGALS9	TMIGD2	CD28	CD48	TNFRSF25	CD40LG	ADORA2A	VTCN1	CD160	CD44	TNFSF18	TNFRSF18	BTNL2	C10orf54	CD200R1	TNFSF4	CD200	NRP1
Cytolytic_activity	PRF1	GZMA
HLA	HLA-E	HLA-DPB2	HLA-C	HLA-J	HLA-DQB1	HLA-DQB2	HLA-DQA2	HLA-DQA1	HLA-A	HLA-DMA	HLA-DOB	HLA-DRB1	HLA-H	HLA-B	HLA-DRB5	HLA-DOA	HLA-DPB1	HLA-DRA	HLA-DRB6	HLA-L	HLA-F	HLA-G	HLA-DMB	HLA-DPA1
Inflammation-promoting	CCL5	CD19	CD8B	CXCL10	CXCL13	CXCL9	GNLY	GZMB	IFNG	IL12A	IL12B	IRF1	PRF1	STAT1	TBX21
MHC_class_I	B2M	HLA-A	TAP1
Parainflammation	CXCL10	PLAT	CCND1	LGMN	PLAUR	AIM2	MMP7	ICAM1	MX2	CXCL9	ANXA1	TLR2	PLA2G2D	ITGA2	MX1	HMOX1	CD276	TIRAP	IL33	PTGES	TNFRSF12A	SCARB1	CD14	BLNK	IFIT3	RETNLB	IFIT2	ISG15	OAS2	REL	OAS3	CD44	PPARG	BST2	OAS1	NOX1	PLA2G2A	IFIT1	IFITM3	IL1RN
T_cell_co-inhibition	BTLA	C10orf54	CD160	CD244	CD274	CTLA4	HAVCR2	LAG3	LAIR1	TIGIT
T_cell_co-stimulation	CD2	CD226	CD27	CD28	CD40LG	ICOS	SLAMF1	TNFRSF18	TNFRSF25	TNFRSF4	TNFRSF8	TNFRSF9	TNFSF14
Type_I_IFN_Reponse	DDX4	IFIT1	IFIT2	IFIT3	IRF7	ISG20	MX1	MX2	RSAD2	TNFSF10
Type_II_IFN_Reponse	GPR146	SELP	AHR
[truncated: 212 more columns]
