# Supplementary material for: Characterization of Fatty Acid Metabolism-Related Genes Landscape for Predicting Prognosis and Aiding Immunotherapy in Glioma Patients
Source: Front Immunol. 2022 Jul 12;13:902143. doi: 10.3389/fimmu.2022.902143 (PMC9315048; doi:10.3389/fimmu.2022.902143)
Supplement: Supplementary Table 2 — PPI network data. [file Table_2.xlsx]

## Sheet: Sheet1
#node1	node2	node1_string_id	node2_string_id	neighborhood_on_chromosome	gene_fusion	phylogenetic_cooccurrence	homology	coexpression	experimentally_determined_interaction	database_annotated	automated_textmining	combined_score
ACTN1	ITGA5	9606.ENSP00000377941	9606.ENSP00000293379	0	0	0	0	0.16	0	0.8	0.37	0.885
ACTN1	LCK	9606.ENSP00000377941	9606.ENSP00000337825	0	0	0	0	0	0.102	0.9	0.113	0.913
ACTN1	PDLIM1	9606.ENSP00000377941	9606.ENSP00000360305	0	0	0	0	0.094	0.842	0	0.672	0.949
ACTN1	ITGB3	9606.ENSP00000377941	9606.ENSP00000452786	0	0	0	0	0.089	0.078	0.6	0.479	0.801
ADAMTS3	COL1A1	9606.ENSP00000286657	9606.ENSP00000225964	0	0	0	0	0.081	0.153	0.9	0.418	0.948
ADAMTS3	MMP13	9606.ENSP00000286657	9606.ENSP00000260302	0	0	0	0	0	0.066	0	0.859	0.862
ADAMTS3	THBS1	9606.ENSP00000286657	9606.ENSP00000260356	0	0	0	0.541	0.062	0.074	0.9	0.279	0.916
ADAMTS3	SPON2	9606.ENSP00000286657	9606.ENSP00000483599	0	0	0	0	0.062	0	0.9	0.173	0.915
ADAMTS3	ADAMTS7	9606.ENSP00000286657	9606.ENSP00000373472	0	0	0	0.748	0.086	0	0.9	0.766	0.922
ADAMTS3	COL5A1	9606.ENSP00000286657	9606.ENSP00000360882	0	0	0	0	0.097	0.153	0.9	0.183	0.929
ADAMTS3	COL5A2	9606.ENSP00000286657	9606.ENSP00000364000	0	0	0	0	0.099	0.153	0.9	0.2	0.93
ADAMTS3	COL3A1	9606.ENSP00000286657	9606.ENSP00000304408	0	0	0	0	0.084	0.153	0.9	0.294	0.937
ADAMTS3	COL1A2	9606.ENSP00000286657	9606.ENSP00000297268	0	0	0	0	0.109	0.243	0.9	0.23	0.941
ADAMTS3	COL2A1	9606.ENSP00000286657	9606.ENSP00000369889	0	0	0	0	0.08	0.153	0.9	0.681	0.971
ADAMTS7	THBS1	9606.ENSP00000373472	9606.ENSP00000260356	0	0	0	0.542	0.077	0.123	0.9	0.587	0.935
ADAMTS7	SPON2	9606.ENSP00000373472	9606.ENSP00000483599	0	0	0	0	0.062	0	0.9	0.079	0.906
ADM	CFH	9606.ENSP00000436607	9606.ENSP00000356399	0	0	0	0	0	0.213	0	0.975	0.98
AIM1	MMP11	9606.ENSP00000358062	9606.ENSP00000215743	0	0	0	0	0	0	0	0.738	0.738
ALDH1A3	RDH10	9606.ENSP00000332256	9606.ENSP00000240285	0	0	0	0	0.065	0.105	0.65	0.715	0.905
ALDH1A3	STRA6	9606.ENSP00000332256	9606.ENSP00000456609	0	0	0	0	0	0	0	0.718	0.718
ALDH1A3	AOX1	9606.ENSP00000332256	9606.ENSP00000363832	0	0	0	0	0.1	0	0.8	0.288	0.86
ANPEP	LGALS3	9606.ENSP00000300060	9606.ENSP00000254301	0	0	0	0	0.102	0	0	0.967	0.969
ANPEP	CD2	9606.ENSP00000300060	9606.ENSP00000358490	0	0	0	0	0.07	0	0	0.739	0.746
ANPEP	DPP4	9606.ENSP00000300060	9606.ENSP00000353731	0.049	0	0	0	0.12	0	0	0.761	0.783
ANXA1	F13A1	9606.ENSP00000366109	9606.ENSP00000264870	0	0	0	0	0.088	0	0.9	0.185	0.919
ANXA1	S100A11	9606.ENSP00000366109	9606.ENSP00000271638	0	0	0	0	0.432	0.683	0	0.989	0.998
ANXA1	COL1A2	9606.ENSP00000366109	9606.ENSP00000297268	0	0	0	0	0.16	0	0.9	0.17	0.924
ANXA1	ANXA2	9606.ENSP00000366109	9606.ENSP00000346032	0	0	0	0.938	0.474	0.365	0.8	0.864	0.931
ANXA1	FN1	9606.ENSP00000366109	9606.ENSP00000346839	0	0	0	0	0.091	0.063	0.9	0.425	0.944
ANXA1	TCEA3	9606.ENSP00000366109	9606.ENSP00000406293	0	0	0	0	0	0	0	0.702	0.702
ANXA1	FPR2	9606.ENSP00000366109	9606.ENSP00000468897	0	0	0	0	0	0	0.6	0.99	0.996
ANXA2	LGALS1	9606.ENSP00000346032	9606.ENSP00000215909	0	0	0	0	0.343	0.487	0	0.381	0.773
ANXA2	PLAT	9606.ENSP00000346032	9606.ENSP00000220809	0	0	0	0	0.096	0.47	0.9	0.988	0.999
ANXA2	LGALS3	9606.ENSP00000346032	9606.ENSP00000254301	0	0	0	0	0.303	0.06	0	0.816	0.869
ANXA2	S100A11	9606.ENSP00000346032	9606.ENSP00000271638	0	0	0	0	0.543	0.157	0	0.988	0.995
ANXA2	S100A4	9606.ENSP00000346032	9606.ENSP00000357705	0	0	0	0	0.199	0.835	0	0.995	0.999
AOX1	RDH10	9606.ENSP00000363832	9606.ENSP00000240285	0	0	0	0	0	0	0.9	0.067	0.902
AOX1	NNMT	9606.ENSP00000363832	9606.ENSP00000441434	0	0	0	0	0.175	0	0.9	0.494	0.954
APOBEC3F	APOBEC3G	9606.ENSP00000309749	9606.ENSP00000385057	0	0	0	0.93	0.164	0.27	0.72	0.948	0.826
APOBEC3F	CD2	9606.ENSP00000309749	9606.ENSP00000358490	0	0	0	0	0.055	0	0	0.833	0.835
APOBEC3G	CD2	9606.ENSP00000385057	9606.ENSP00000358490	0	0	0	0	0.15	0	0	0.896	0.908
APOBEC3G	CISH	9606.ENSP00000385057	9606.ENSP00000409346	0	0	0	0	0	0	0	0.869	0.869
AQP1	AQP9	9606.ENSP00000311165	9606.ENSP00000219919	0	0	0.42	0.649	0.062	0	0.6	0.906	0.769
AQP5	AQP9	9606.ENSP00000293599	9606.ENSP00000219919	0	0	0.42	0.702	0	0	0.6	0.814	0.731
AREG	MET	9606.ENSP00000379097	9606.ENSP00000317272	0	0	0	0	0.076	0	0.6	0.466	0.785
AREG	S100A4	9606.ENSP00000379097	9606.ENSP00000357705	0	0	0	0	0.066	0.617	0	0.576	0.835
ASF1B	CDC6	9606.ENSP00000263382	9606.ENSP00000209728	0	0	0	0	0.783	0.067	0	0.17	0.817
ASF1B	AURKA	9606.ENSP00000263382	9606.ENSP00000216911	0	0	0	0	0.823	0	0	0.213	0.854
ASF1B	MYBL2	9606.ENSP00000263382	9606.ENSP00000217026	0	0	0	0	0.588	0	0	0.367	0.728
ASF1B	DLGAP5	9606.ENSP00000263382	9606.ENSP00000247191	0	0	0	0	0.695	0	0	0.385	0.804
ASF1B	NCAPG	9606.ENSP00000263382	9606.ENSP00000251496	0	0	0	0	0.716	0	0	0	0.716
ASF1B	CCNB1	9606.ENSP00000263382	9606.ENSP00000256442	0	0	0	0	0.714	0.127	0	0.195	0.782
ASF1B	TROAP	9606.ENSP00000263382	9606.ENSP00000257909	0	0	0	0	0.748	0	0	0	0.748
ASF1B	NDC80	9606.ENSP00000263382	9606.ENSP00000261597	0	0	0	0	0.835	0	0	0.058	0.838
ASF1B	CENPE	9606.ENSP00000263382	9606.ENSP00000265148	0	0	0	0	0.651	0	0	0.195	0.707
ASF1B	TK1	9606.ENSP00000263382	9606.ENSP00000301634	0	0	0	0	0.587	0	0	0.341	0.716
ASF1B	SKA1	9606.ENSP00000263382	9606.ENSP00000285116	0	0	0	0	0.614	0	0	0.309	0.722
ASF1B	SHCBP1	9606.ENSP00000263382	9606.ENSP00000306473	0	0	0	0	0.713	0	0	0.113	0.735
ASF1B	PTTG1	9606.ENSP00000263382	9606.ENSP00000377536	0	0	0	0	0.688	0	0	0.203	0.741
ASF1B	NEK2	9606.ENSP00000263382	9606.ENSP00000355966	0	0	0	0	0.731	0	0	0.095	0.746
ASF1B	CEP55	9606.ENSP00000263382	9606.ENSP00000360540	0	0	0	0	0.666	0	0	0.324	0.764
ASF1B	PBK	9606.ENSP00000263382	9606.ENSP00000428489	0	0	0	0	0.695	0.061	0	0.244	0.764
ASF1B	MELK	9606.ENSP00000263382	9606.ENSP00000298048	0	0	0	0	0.723	0.071	0	0.165	0.767
ASF1B	KIAA0101	9606.ENSP00000263382	9606.ENSP00000300035	0	0	0	0	0.681	0	0	0.34	0.78
ASF1B	BIRC5	9606.ENSP00000263382	9606.ENSP00000301633	0	0	0	0	0.717	0	0	0.284	0.788
ASF1B	CENPA	9606.ENSP00000263382	9606.ENSP00000336868	0	0	0	0	0.57	0.306	0	0.412	0.809
ASF1B	ASPM	9606.ENSP00000263382	9606.ENSP00000356379	0	0	0	0	0.764	0	0	0.283	0.824
ASF1B	HJURP	9606.ENSP00000263382	9606.ENSP00000414109	0	0	0	0	0.693	0	0	0.468	0.83
ASF1B	KIF4A	9606.ENSP00000263382	9606.ENSP00000363524	0	0	0	0	0.821	0	0	0.157	0.842
ASF1B	SGOL1	9606.ENSP00000263382	9606.ENSP00000263753	0	0	0	0	0.815	0	0	0.188	0.843
ASF1B	BUB1	9606.ENSP00000263382	9606.ENSP00000302530	0	0	0	0	0.835	0.104	0	0.15	0.863
ASF1B	UBE2C	9606.ENSP00000263382	9606.ENSP00000348838	0	0	0	0	0.822	0.15	0	0.173	0.864
ASF1B	TOP2A	9606.ENSP00000263382	9606.ENSP00000411532	0	0	0	0	0.816	0.056	0	0.351	0.877
ASF1B	KIF2C	9606.ENSP00000263382	9606.ENSP00000361298	0	0	0	0	0.882	0	0	0.048	0.883
ASF1B	CCNA2	9606.ENSP00000263382	9606.ENSP00000274026	0	0	0	0	0.883	0.076	0	0.17	0.902
ASF1B	AURKB	9606.ENSP00000263382	9606.ENSP00000313950	0	0	0	0	0.896	0	0	0.172	0.91
ASF1B	RRM2	9606.ENSP00000263382	9606.ENSP00000353770	0	0	0	0	0.843	0.257	0	0.345	0.917
ASF1B	KIF20A	9606.ENSP00000263382	9606.ENSP00000378356	0	0	0	0	0.887	0	0	0.315	0.919
ASF1B	CDC20	9606.ENSP00000263382	9606.ENSP00000361540	0	0	0	0	0.905	0.07	0	0.249	0.928
ASF1B	CDC45	9606.ENSP00000263382	9606.ENSP00000405726	0	0	0	0	0.822	0.056	0	0.651	0.936
ASF1B	CDCA8	9606.ENSP00000263382	9606.ENSP00000362146	0	0	0	0	0.918	0	0	0.32	0.942
ASF1B	CCNB2	9606.ENSP00000263382	9606.ENSP00000288207	0	0	0	0	0.934	0.127	0	0.152	0.947
ASF1B	HIST1H3J	9606.ENSP00000263382	9606.ENSP00000352252	0	0	0	0	0.086	0.912	0	0.467	0.953
ASF1B	CHAF1B	9606.ENSP00000263382	9606.ENSP00000315700	0	0	0	0	0.571	0.971	0	0.771	0.997
ASPM	CDC6	9606.ENSP00000356379	9606.ENSP00000209728	0	0	0	0	0.823	0	0	0.185	0.849
ASPM	AURKA	9606.ENSP00000356379	9606.ENSP00000216911	0	0	0	0	0.898	0.283	0	0.543	0.963
ASPM	DLGAP5	9606.ENSP00000356379	9606.ENSP00000247191	0	0	0	0	0.982	0	0	0.558	0.992
ASPM	FAM64A	9606.ENSP00000356379	9606.ENSP00000250056	0	0	0	0	0.752	0	0	0.354	0.833
ASPM	NCAPG	9606.ENSP00000356379	9606.ENSP00000251496	0	0	0	0	0.991	0	0	0.528	0.995
ASPM	CCNB1	9606.ENSP00000356379	9606.ENSP00000256442	0	0	0	0	0.952	0.057	0	0.473	0.974
ASPM	TROAP	9606.ENSP00000356379	9606.ENSP00000257909	0	0	0	0	0.893	0	0	0.313	0.923
ASPM	KIF23	9606.ENSP00000356379	9606.ENSP00000260363	0	0	0	0	0.976	0.499	0	0.539	0.994
ASPM	NDC80	9606.ENSP00000356379	9606.ENSP00000261597	0	0	0	0	0.98	0	0	0.194	0.983
ASPM	KIF18A	9606.ENSP00000356379	9606.ENSP00000263181	0	0	0	0	0.849	0.243	0	0.362	0.92
ASPM	SGOL1	9606.ENSP00000356379	9606.ENSP00000263753	0	0	0	0	0.832	0	0	0.31	0.879
ASPM	CENPE	9606.ENSP00000356379	9606.ENSP00000265148	0	0	0	0	0.985	0.243	0	0.546	0.994
ASPM	NUF2	9606.ENSP00000356379	9606.ENSP00000271452	0	0	0	0	0.894	0	0	0.455	0.94
ASPM	CCNA2	9606.ENSP00000356379	9606.ENSP00000274026	0	0	0	0	0.976	0.057	0	0.544	0.988
ASPM	CENPU	9606.ENSP00000356379	9606.ENSP00000281453	0	0	0	0	0.805	0	0	0.275	0.853
ASPM	SKA1	9606.ENSP00000356379	9606.ENSP00000285116	0	0	0	0	0.733	0	0	0.457	0.849
ASPM	CCNB2	9606.ENSP00000356379	9606.ENSP00000288207	0	0	0	0	0.909	0.057	0	0.518	0.955
ASPM	MELK	9606.ENSP00000356379	9606.ENSP00000298048	0	0	0	0	0.924	0.075	0	0.45	0.958
ASPM	KIAA0101	9606.ENSP00000356379	9606.ENSP00000300035	0	0	0	0	0.907	0	0	0.475	0.949
ASPM	BIRC5	9606.ENSP00000356379	9606.ENSP00000301633	0	0	0	0	0.893	0.058	0	0.473	0.942
ASPM	BUB1	9606.ENSP00000356379	9606.ENSP00000302530	0	0	0	0	0.983	0.325	0	0.481	0.993
ASPM	CKAP2L	9606.ENSP00000356379	9606.ENSP00000305204	0	0	0	0	0.883	0	0	0.317	0.917
ASPM	SHCBP1	9606.ENSP00000356379	9606.ENSP00000306473	0	0	0	0	0.832	0	0	0.103	0.843
ASPM	CLSPN	9606.ENSP00000356379	9606.ENSP00000312995	0	0	0	0	0.747	0	0	0.08	0.758
ASPM	AURKB	9606.ENSP00000356379	9606.ENSP00000313950	0	0	0	0	0.956	0.059	0	0.485	0.977
ASPM	TYMS	9606.ENSP00000356379	9606.ENSP00000315644	0	0	0	0	0.838	0	0	0.243	0.872
ASPM	CDC25C	9606.ENSP00000356379	9606.ENSP00000321656	0	0	0	0	0.707	0	0	0.194	0.753
ASPM	TACC3	9606.ENSP00000356379	9606.ENSP00000326550	0	0	0	0	0.913	0	0	0.399	0.945
ASPM	CDCA2	9606.ENSP00000356379	9606.ENSP00000328228	0	0	0	0	0.775	0	0	0.294	0.834
ASPM	CDKN3	9606.ENSP00000356379	9606.ENSP00000335357	0	0	0	0	0.897	0.145	0	0.197	0.923
ASPM	CENPA	9606.ENSP00000356379	9606.ENSP00000336868	0	0	0	0	0.83	0.061	0	0.323	0.882
ASPM	UBE2C	9606.ENSP00000356379	9606.ENSP00000348838	0	0	0	0	0.898	0.102	0	0.406	0.941
ASPM	RRM2	9606.ENSP00000356379	9606.ENSP00000353770	0	0	0	0	0.912	0.07	0	0.459	0.951
ASPM	EXO1	9606.ENSP00000356379	9606.ENSP00000355506	0	0	0	0	0.918	0.077	0	0.217	0.936
ASPM	NEK2	9606.ENSP00000356379	9606.ENSP00000355966	0	0	0	0	0.911	0.058	0	0.465	0.951
ASPM	CENPK	9606.ENSP00000356379	9606.ENSP00000379911	0	0	0	0	0.593	0	0	0.311	0.708
ASPM	FAM83D	9606.ENSP00000356379	9606.ENSP00000481110	0	0	0	0	0.686	0	0	0.229	0.748
ASPM	CDC45	9606.ENSP00000356379	9606.ENSP00000405726	0	0	0	0	0.828	0	0	0.203	0.857
ASPM	E2F8	9606.ENSP00000356379	9606.ENSP00000481103	0	0	0	0	0.863	0	0	0.102	0.872
ASPM	PTTG1	9606.ENSP00000356379	9606.ENSP00000377536	0	0	0	0	0.844	0	0	0.389	0.9
ASPM	DEPDC1	9606.ENSP00000356379	9606.ENSP00000412292	0	0	0	0	0.9	0	0	0.267	0.924
ASPM	HJURP	9606.ENSP00000356379	9606.ENSP00000414109	0	0	0	0	0.893	0	0	0.334	0.925
ASPM	PBK	9606.ENSP00000356379	9606.ENSP00000428489	0	0	0	0	0.925	0.075	0	0.422	0.956
ASPM	KIF2C	9606.ENSP00000356379	9606.ENSP00000361298	0	0	0	0	0.915	0.243	0	0.518	0.966
ASPM	CEP55	9606.ENSP00000356379	9606.ENSP00000360540	0	0	0	0	0.935	0	0	0.556	0.969
ASPM	WDR62	9606.ENSP00000356379	9606.ENSP00000384792	0	0	0	0	0.155	0.347	0	0.949	0.969
ASPM	KIF20A	9606.ENSP00000356379	9606.ENSP00000378356	0	0	0	0	0.915	0.252	0	0.591	0.971
ASPM	CDCA8	9606.ENSP00000356379	9606.ENSP00000362146	0	0	0	0	0.965	0	0	0.392	0.978
ASPM	KIF4A	9606.ENSP00000356379	9606.ENSP00000363524	0	0	0	0	0.951	0.243	0	0.554	0.982
ASPM	CDC20	9606.ENSP00000356379	9606.ENSP00000361540	0	0	0	0	0.969	0.25	0	0.468	0.986
ASPM	TOP2A	9606.ENSP00000356379	9606.ENSP00000411532	0	0	0	0	0.968	0	0	0.605	0.987
ASPM	TTK	9606.ENSP00000356379	9606.ENSP00000358813	0	0	0	0	0.986	0.06	0	0.503	0.993
ASPN	COL3A1	9606.ENSP00000364694	9606.ENSP00000304408	0	0	0	0	0.734	0.076	0	0.457	0.854
ASPN	POSTN	9606.ENSP00000364694	9606.ENSP00000369071	0	0	0	0	0.354	0	0	0.579	0.716
ASPN	SFRP4	9606.ENSP00000364694	9606.ENSP00000410715	0	0	0	0	0.726	0	0	0.179	0.765
AURKA	CDC6	9606.ENSP00000216911	9606.ENSP00000209728	0	0	0	0	0.684	0.18	0	0.514	0.863
AURKA	CENPU	9606.ENSP00000216911	9606.ENSP00000281453	0	0	0	0	0.578	0	0	0.338	0.709
AURKA	TK1	9606.ENSP00000216911	9606.ENSP00000301634	0	0	0	0	0.614	0	0	0.32	0.726
AURKA	WDR62	9606.ENSP00000216911	9606.ENSP00000384792	0	0	0	0	0.131	0.274	0	0.605	0.73
AURKA	SHCBP1	9606.ENSP00000216911	9606.ENSP00000306473	0	0	0	0	0.749	0	0	0.058	0.753
AURKA	FAM64A	9606.ENSP00000216911	9606.ENSP00000250056	0	0	0	0	0.7	0	0	0.227	0.758
AURKA	SKA1	9606.ENSP00000216911	9606.ENSP00000285116	0	0	0	0	0.713	0	0	0.217	0.765
AURKA	DEPDC1	9606.ENSP00000216911	9606.ENSP00000412292	0	0	0	0	0.693	0	0	0.285	0.771
AURKA	KIF18A	9606.ENSP00000216911	9606.ENSP00000263181	0	0	0	0	0.616	0.146	0	0.401	0.787
AURKA	FAM83D	9606.ENSP00000216911	9606.ENSP00000481110	0	0	0	0	0.695	0	0	0.34	0.79
AURKA	EXO1	9606.ENSP00000216911	9606.ENSP00000355506	0	0	0	0	0.751	0	0	0.269	0.81
AURKA	TROAP	9606.ENSP00000216911	9606.ENSP00000257909	0	0	0	0	0.814	0	0	0.074	0.82
AURKA	CKAP2L	9606.ENSP00000216911	9606.ENSP00000305204	0	0	0	0	0.754	0	0	0.317	0.825
AURKA	KIAA0101	9606.ENSP00000216911	9606.ENSP00000300035	0	0	0	0	0.772	0	0	0.296	0.832
AURKA	MYBL2	9606.ENSP00000216911	9606.ENSP00000217026	0	0	0	0	0.583	0.088	0	0.622	0.844
AURKA	CDC25C	9606.ENSP00000216911	9606.ENSP00000321656	0	0	0	0	0.712	0	0	0.572	0.871
AURKA	HJURP	9606.ENSP00000216911	9606.ENSP00000414109	0	0	0	0	0.834	0	0	0.317	0.882
AURKA	TYMS	9606.ENSP00000216911	9606.ENSP00000315644	0	0	0	0	0.859	0	0	0.384	0.909
AURKA	NUF2	9606.ENSP00000216911	9606.ENSP00000271452	0	0	0	0	0.74	0.27	0	0.566	0.91
AURKA	RRM2	9606.ENSP00000216911	9606.ENSP00000353770	0	0	0	0	0.825	0	0	0.51	0.91
AURKA	NEK2	9606.ENSP00000216911	9606.ENSP00000355966	0	0	0.361	0.69	0.876	0	0	0.681	0.912
AURKA	SGOL1	9606.ENSP00000216911	9606.ENSP00000263753	0	0	0	0	0.868	0	0	0.369	0.913
AURKA	PBK	9606.ENSP00000216911	9606.ENSP00000428489	0	0	0	0	0.873	0.075	0	0.419	0.926
AURKA	CDC45	9606.ENSP00000216911	9606.ENSP00000405726	0	0	0	0	0.894	0	0	0.344	0.927
AURKA	CEP55	9606.ENSP00000216911	9606.ENSP00000360540	0	0	0	0	0.846	0.117	0	0.503	0.927
AURKA	MELK	9606.ENSP00000216911	9606.ENSP00000298048	0	0	0	0.738	0.917	0	0	0.571	0.929
AURKA	TTK	9606.ENSP00000216911	9606.ENSP00000358813	0	0	0	0.626	0.913	0.108	0	0.739	0.941
AURKA	CDKN3	9606.ENSP00000216911	9606.ENSP00000335357	0	0	0	0	0.901	0.243	0	0.393	0.95
AURKA	NCAPG	9606.ENSP00000216911	9606.ENSP00000251496	0	0	0	0	0.899	0.103	0	0.524	0.953
AURKA	CENPE	9606.ENSP00000216911	9606.ENSP00000265148	0	0	0	0	0.887	0.146	0	0.66	0.964
AURKA	KIF2C	9606.ENSP00000216911	9606.ENSP00000361298	0	0	0	0	0.865	0.349	0	0.636	0.965
AURKA	KIF4A	9606.ENSP00000216911	9606.ENSP00000363524	0	0	0	0	0.919	0.146	0	0.603	0.97
AURKA	TOP2A	9606.ENSP00000216911	9606.ENSP00000411532	0	0	0	0	0.918	0.093	0	0.696	0.975
AURKA	KIF20A	9606.ENSP00000216911	9606.ENSP00000378356	0	0	0	0	0.942	0.146	0	0.564	0.976
AURKA	KIF23	9606.ENSP00000216911	9606.ENSP00000260363	0	0	0	0	0.915	0.146	0	0.738	0.979
AURKA	NDC80	9606.ENSP00000216911	9606.ENSP00000261597	0	0	0	0	0.909	0.499	0	0.677	0.984
AURKA	CDCA8	9606.ENSP00000216911	9606.ENSP00000362146	0	0	0	0	0.933	0	0.54	0.61	0.987
AURKA	CCNA2	9606.ENSP00000216911	9606.ENSP00000274026	0	0	0	0	0.964	0.104	0	0.625	0.987
AURKA	CCNB1	9606.ENSP00000216911	9606.ENSP00000256442	0	0	0	0	0.926	0.165	0	0.821	0.988
AURKA	UBE2C	9606.ENSP00000216911	9606.ENSP00000348838	0	0	0	0	0.95	0.282	0.3	0.66	0.99
AURKA	BUB1	9606.ENSP00000216911	9606.ENSP00000302530	0	0	0	0	0.963	0.101	0	0.817	0.993
AURKA	CENPA	9606.ENSP00000216911	9606.ENSP00000336868	0	0	0	0	0.828	0.173	0.9	0.602	0.993
AURKA	AURKB	9606.ENSP00000216911	9606.ENSP00000313950	0	0	0.445	0.959	0.925	0.308	0.9	0.912	0.994
AURKA	CCNB2	9606.ENSP00000216911	9606.ENSP00000288207	0	0	0	0	0.972	0.364	0	0.743	0.995
AURKA	PTTG1	9606.ENSP00000216911	9606.ENSP00000377536	0	0	0	0	0.907	0.308	0.9	0.692	0.997
AURKA	BIRC5	9606.ENSP00000216911	9606.ENSP00000301633	0	0	0	0	0.87	0.518	0.9	0.791	0.998
AURKA	DLGAP5	9606.ENSP00000216911	9606.ENSP00000247191	0	0	0	0	0.948	0.271	0.9	0.681	0.998
AURKA	CDC20	9606.ENSP00000216911	9606.ENSP00000361540	0	0	0	0	0.974	0.532	0.9	0.878	0.999
AURKA	TACC3	9606.ENSP00000216911	9606.ENSP00000326550	0	0	0	0	0.698	0.911	0.9	0.899	0.999
AURKB	CDC6	9606.ENSP00000313950	9606.ENSP00000209728	0	0	0	0	0.767	0.18	0	0.553	0.907
AURKB	MYBL2	9606.ENSP00000313950	9606.ENSP00000217026	0	0	0	0	0.59	0.088	0	0.405	0.758
AURKB	DLGAP5	9606.ENSP00000313950	9606.ENSP00000247191	0	0	0	0	0.956	0	0	0.65	0.984
AURKB	FAM64A	9606.ENSP00000313950	9606.ENSP00000250056	0	0	0	0	0.802	0	0	0.307	0.857
AURKB	NCAPG	9606.ENSP00000313950	9606.ENSP00000251496	0	0	0	0	0.959	0.103	0.9	0.478	0.997
AURKB	CCNB1	9606.ENSP00000313950	9606.ENSP00000256442	0	0	0	0	0.941	0.165	0	0.821	0.99
AURKB	TROAP	9606.ENSP00000313950	9606.ENSP00000257909	0	0	0	0	0.916	0	0	0.181	0.928
AURKB	KIF23	9606.ENSP00000313950	9606.ENSP00000260363	0	0	0	0	0.882	0.349	0.9	0.845	0.998
AURKB	NDC80	9606.ENSP00000313950	9606.ENSP00000261597	0	0	0	0	0.957	0.499	0.9	0.874	0.999
AURKB	KIF18A	9606.ENSP00000313950	9606.ENSP00000263181	0	0	0	0	0.436	0.146	0	0.463	0.719
AURKB	SGOL1	9606.ENSP00000313950	9606.ENSP00000263753	0	0	0	0	0.85	0.27	0.9	0.81	0.997
AURKB	CENPE	9606.ENSP00000313950	9606.ENSP00000265148	0	0	0	0	0.935	0.146	0	0.826	0.989
AURKB	NUF2	9606.ENSP00000313950	9606.ENSP00000271452	0	0	0	0	0.829	0.27	0	0.806	0.973
AURKB	CCNA2	9606.ENSP00000313950	9606.ENSP00000274026	0	0	0	0	0.967	0.104	0	0.672	0.989
AURKB	CENPU	9606.ENSP00000313950	9606.ENSP00000281453	0	0	0	0	0.551	0	0	0.411	0.724
AURKB	SKA1	9606.ENSP00000313950	9606.ENSP00000285116	0	0	0	0	0.802	0.27	0	0.561	0.931
AURKB	CCNB2	9606.ENSP00000313950	9606.ENSP00000288207	0	0	0	0	0.962	0.165	0	0.735	0.991
AURKB	MELK	9606.ENSP00000313950	9606.ENSP00000298048	0	0	0	0.742	0.872	0	0	0.615	0.892
AURKB	KIAA0101	9606.ENSP00000313950	9606.ENSP00000300035	0	0	0	0	0.922	0	0	0.161	0.932
AURKB	BIRC5	9606.ENSP00000313950	9606.ENSP00000301633	0	0	0	0	0.874	0.933	0.9	0.814	0.999
AURKB	TK1	9606.ENSP00000313950	9606.ENSP00000301634	0	0	0	0	0.633	0	0	0.31	0.736
AURKB	BUB1	9606.ENSP00000313950	9606.ENSP00000302530	0	0	0	0	0.922	0.101	0.9	0.897	0.999
AURKB	CKAP2L	9606.ENSP00000313950	9606.ENSP00000305204	0	0	0	0	0.755	0	0	0.179	0.79
AURKB	SHCBP1	9606.ENSP00000313950	9606.ENSP00000306473	0	0	0	0	0.751	0	0	0.262	0.808
AURKB	ERCC6L	9606.ENSP00000313950	9606.ENSP00000334675	0	0	0	0	0.58	0	0	0.385	0.73
AURKB	FAM83D	9606.ENSP00000313950	9606.ENSP00000481110	0	0	0	0	0.691	0	0	0.212	0.746
AURKB	DEPDC1	9606.ENSP00000313950	9606.ENSP00000412292	0	0	0	0	0.686	0	0	0.287	0.766
AURKB	ORC1	9606.ENSP00000313950	9606.ENSP00000360623	0	0	0	0	0.632	0.208	0	0.274	0.77
AURKB	EXO1	9606.ENSP00000313950	9606.ENSP00000355506	0	0	0	0	0.722	0	0	0.228	0.776
AURKB	E2F8	9606.ENSP00000313950	9606.ENSP00000481103	0	0	0	0	0.748	0	0	0.296	0.815
AURKB	CDCA2	9606.ENSP00000313950	9606.ENSP00000328228	0	0	0	0	0.622	0	0	0.577	0.834
AURKB	CDC25C	9606.ENSP00000313950	9606.ENSP00000321656	0	0	0	0	0.724	0	0	0.585	0.88
AURKB	CDKN3	9606.ENSP00000313950	9606.ENSP00000335357	0	0	0	0	0.804	0.243	0	0.385	0.901
AURKB	GSG2	9606.ENSP00000313950	9606.ENSP00000325290	0	0	0	0	0.341	0.27	0	0.81	0.901
AURKB	PBK	9606.ENSP00000313950	9606.ENSP00000428489	0	0	0	0	0.857	0.075	0	0.375	0.91
AURKB	CEP55	9606.ENSP00000313950	9606.ENSP00000360540	0	0	0	0	0.82	0	0	0.558	0.917
AURKB	NEK2	9606.ENSP00000313950	9606.ENSP00000355966	0	0	0.388	0.695	0.888	0	0	0.655	0.92
AURKB	HJURP	9606.ENSP00000313950	9606.ENSP00000414109	0	0	0	0	0.886	0	0	0.37	0.925
AURKB	SPC24	9606.ENSP00000313950	9606.ENSP00000465075	0	0	0	0	0.849	0	0	0.563	0.931
AURKB	VIM	9606.ENSP00000313950	9606.ENSP00000446007	0	0	0	0	0.066	0.27	0.9	0.124	0.932
AURKB	TYMS	9606.ENSP00000313950	9606.ENSP00000315644	0	0	0	0	0.914	0	0	0.292	0.937
AURKB	CDC45	9606.ENSP00000313950	9606.ENSP00000405726	0	0	0	0	0.895	0	0	0.436	0.938
AURKB	RRM2	9606.ENSP00000313950	9606.ENSP00000353770	0	0	0	0	0.921	0	0	0.394	0.95
AURKB	DES	9606.ENSP00000313950	9606.ENSP00000363071	0	0	0	0	0.066	0.487	0.9	0.227	0.958
AURKB	TTK	9606.ENSP00000313950	9606.ENSP00000358813	0	0	0	0.645	0.934	0.334	0	0.765	0.966
AURKB	KIF4A	9606.ENSP00000313950	9606.ENSP00000363524	0	0	0	0	0.89	0.146	0	0.71	0.97
AURKB	TACC3	9606.ENSP00000313950	9606.ENSP00000326550	0	0	0	0	0.897	0.244	0	0.703	0.974
AURKB	UBE2C	9606.ENSP00000313950	9606.ENSP00000348838	0	0	0	0	0.933	0.058	0.3	0.584	0.979
AURKB	TOP2A	9606.ENSP00000313950	9606.ENSP00000411532	0	0	0	0	0.947	0.309	0	0.641	0.985
AURKB	PTTG1	9606.ENSP00000313950	9606.ENSP00000377536	0	0	0	0	0.833	0	0.9	0.69	0.994
AURKB	CDC20	9606.ENSP00000313950	9606.ENSP00000361540	0	0	0	0	0.972	0.335	0.6	0.862	0.998
AURKB	CENPA	9606.ENSP00000313950	9606.ENSP00000336868	0	0	0	0	0.808	0.719	0.9	0.871	0.999
AURKB	CDCA8	9606.ENSP00000313950	9606.ENSP00000362146	0	0	0	0	0.968	0.897	0.9	0.99	0.999
AURKB	KIF20A	9606.ENSP00000313950	9606.ENSP00000378356	0	0	0	0	0.932	0.711	0.9	0.955	0.999
AURKB	KIF2C	9606.ENSP00000313950	9606.ENSP00000361298	0	0	0	0	0.911	0.146	0.9	0.922	0.999
B3GNT7	LUM	9606.ENSP00000287590	9606.ENSP00000266718	0	0	0	0	0.053	0.056	0.9	0.373	0.936
B3GNT7	FMOD	9606.ENSP00000287590	9606.ENSP00000347041	0	0	0	0	0.053	0.056	0.9	0.118	0.91
BCAT1	LDHA	9606.ENSP00000443459	9606.ENSP00000445175	0.071	0	0	0	0.097	0.128	0.6	0.366	0.781
BCAT1	IL4I1	9606.ENSP00000443459	9606.ENSP00000472474	0	0	0	0	0.063	0	0.8	0.135	0.823
BIRC5	CDC6	9606.ENSP00000301633	9606.ENSP00000209728	0	0	0	0	0.707	0.082	0	0.469	0.845
BIRC5	MYBL2	9606.ENSP00000301633	9606.ENSP00000217026	0	0	0	0	0.55	0.077	0	0.595	0.817
BIRC5	TWIST1	9606.ENSP00000301633	9606.ENSP00000242261	0	0	0	0	0	0	0.9	0.246	0.921
BIRC5	DLGAP5	9606.ENSP00000301633	9606.ENSP00000247191	0	0	0	0	0.913	0	0	0.504	0.955
BIRC5	FAM64A	9606.ENSP00000301633	9606.ENSP00000250056	0	0	0	0	0.831	0	0	0.229	0.864
BIRC5	NCAPG	9606.ENSP00000301633	9606.ENSP00000251496	0	0	0	0	0.892	0.102	0	0.402	0.937
BIRC5	CCNB1	9606.ENSP00000301633	9606.ENSP00000256442	0	0	0	0	0.887	0.153	0	0.683	0.967
BIRC5	TROAP	9606.ENSP00000301633	9606.ENSP00000257909	0	0	0	0	0.822	0	0	0.202	0.852
BIRC5	KIF23	9606.ENSP00000301633	9606.ENSP00000260363	0	0	0	0	0.726	0.282	0.9	0.451	0.987
BIRC5	NDC80	9606.ENSP00000301633	9606.ENSP00000261597	0	0	0	0	0.934	0	0	0.474	0.964
BIRC5	SGOL1	9606.ENSP00000301633	9606.ENSP00000263753	0	0	0	0	0.756	0.059	0.9	0.365	0.983
BIRC5	CENPE	9606.ENSP00000301633	9606.ENSP00000265148	0	0	0	0	0.768	0.069	0	0.586	0.903
BIRC5	NUF2	9606.ENSP00000301633	9606.ENSP00000271452	0	0	0	0	0.839	0	0	0.494	0.915
BIRC5	CCNA2	9606.ENSP00000301633	9606.ENSP00000274026	0	0	0	0	0.921	0.144	0	0.559	0.967
BIRC5	CENPU	9606.ENSP00000301633	9606.ENSP00000281453	0	0	0	0	0.609	0	0	0.287	0.709
BIRC5	SKA1	9606.ENSP00000301633	9606.ENSP00000285116	0	0	0	0	0.58	0	0	0.337	0.71
BIRC5	CCNB2	9606.ENSP00000301633	9606.ENSP00000288207	0	0	0	0	0.88	0.153	0	0.638	0.96
BIRC5	MELK	9606.ENSP00000301633	9606.ENSP00000298048	0	0	0	0	0.896	0.143	0	0.454	0.947
BIRC5	KIAA0101	9606.ENSP00000301633	9606.ENSP00000300035	0	0	0	0	0.893	0	0	0.345	0.927
BIRC5	HFE	9606.ENSP00000301633	9606.ENSP00000417404	0	0	0	0	0	0.709	0	0.052	0.712
BIRC5	SPC24	9606.ENSP00000301633	9606.ENSP00000465075	0	0	0	0	0.654	0	0	0.297	0.746
BIRC5	TACC3	9606.ENSP00000301633	9606.ENSP00000326550	0	0	0	0	0.676	0	0	0.289	0.76
BIRC5	SHCBP1	9606.ENSP00000301633	9606.ENSP00000306473	0	0	0	0	0.777	0	0	0.211	0.816
BIRC5	EXO1	9606.ENSP00000301633	9606.ENSP00000355506	0	0	0	0	0.775	0.078	0	0.222	0.824
BIRC5	CDC25C	9606.ENSP00000301633	9606.ENSP00000321656	0	0	0	0	0.723	0	0	0.459	0.844
BIRC5	TYMS	9606.ENSP00000301633	9606.ENSP00000315644	0	0	0	0	0.752	0	0	0.468	0.862
BIRC5	CDKN3	9606.ENSP00000301633	9606.ENSP00000335357	0	0	0	0	0.821	0.14	0	0.25	0.874
BIRC5	CDC45	9606.ENSP00000301633	9606.ENSP00000405726	0	0	0	0	0.844	0	0	0.314	0.889
BIRC5	CCDC8	9606.ENSP00000301633	9606.ENSP00000303158	0	0	0	0	0	0	0.9	0	0.9
BIRC5	HJURP	9606.ENSP00000301633	9606.ENSP00000414109	0	0	0	0	0.888	0	0	0.262	0.913
BIRC5	CEP55	9606.ENSP00000301633	9606.ENSP00000360540	0	0	0	0	0.833	0	0	0.518	0.916
BIRC5	TK1	9606.ENSP00000301633	9606.ENSP00000301634	0	0	0	0	0.891	0	0	0.506	0.944
BIRC5	RRM2	9606.ENSP00000301633	9606.ENSP00000353770	0	0	0	0	0.887	0	0	0.557	0.947
BIRC5	NEK2	9606.ENSP00000301633	9606.ENSP00000355966	0	0	0	0	0.893	0.164	0	0.499	0.951
BIRC5	PTTG1	9606.ENSP00000301633	9606.ENSP00000377536	0	0	0	0	0.906	0	0	0.519	0.952
BIRC5	TTK	9606.ENSP00000301633	9606.ENSP00000358813	0	0	0	0	0.918	0	0	0.515	0.959
BIRC5	TOP2A	9606.ENSP00000301633	9606.ENSP00000411532	0	0	0	0	0.884	0	0	0.662	0.959
BIRC5	KIF4A	9606.ENSP00000301633	9606.ENSP00000363524	0	0	0	0	0.911	0.057	0	0.581	0.962
BIRC5	PBK	9606.ENSP00000301633	9606.ENSP00000428489	0	0	0	0	0.959	0.116	0	0.455	0.978
BIRC5	UBE2C	9606.ENSP00000301633	9606.ENSP00000348838	0	0	0	0	0.956	0.112	0	0.638	0.984
BIRC5	CDC20	9606.ENSP00000301633	9606.ENSP00000361540	0	0	0	0	0.963	0.058	0	0.667	0.987
BIRC5	CENPA	9606.ENSP00000301633	9606.ENSP00000336868	0	0	0	0	0.782	0.17	0.9	0.511	0.989
BIRC5	KIF20A	9606.ENSP00000301633	9606.ENSP00000378356	0	0	0	0	0.88	0.057	0.9	0.449	0.992
BIRC5	KIF2C	9606.ENSP00000301633	9606.ENSP00000361298	0	0	0	0	0.874	0.057	0.9	0.536	0.993
BIRC5	BUB1	9606.ENSP00000301633	9606.ENSP00000302530	0	0	0	0	0.901	0.124	0.9	0.661	0.996
BIRC5	CDCA8	9606.ENSP00000301633	9606.ENSP00000362146	0	0	0	0	0.948	0.908	0.9	0.854	0.999
BUB1	CDC6	9606.ENSP00000302530	9606.ENSP00000209728	0	0	0	0	0.876	0.07	0	0.538	0.942
BUB1	MYBL2	9606.ENSP00000302530	9606.ENSP00000217026	0	0	0	0	0.583	0.106	0	0.463	0.782
BUB1	DLGAP5	9606.ENSP00000302530	9606.ENSP00000247191	0	0	0	0	0.972	0	0	0.583	0.988
BUB1	FAM64A	9606.ENSP00000302530	9606.ENSP00000250056	0	0	0	0	0.808	0	0	0.275	0.855
BUB1	NCAPG	9606.ENSP00000302530	9606.ENSP00000251496	0	0	0	0	0.974	0	0	0.572	0.988
BUB1	CCNB1	9606.ENSP00000302530	9606.ENSP00000256442	0	0	0	0	0.906	0.101	0.9	0.814	0.998
BUB1	TROAP	9606.ENSP00000302530	9606.ENSP00000257909	0	0	0	0	0.888	0	0	0.094	0.894
BUB1	KIF23	9606.ENSP00000302530	9606.ENSP00000260363	0	0	0	0	0.972	0.183	0	0.551	0.989
BUB1	NDC80	9606.ENSP00000302530	9606.ENSP00000261597	0	0	0	0	0.968	0.895	0.72	0.851	0.999
BUB1	KIF18A	9606.ENSP00000302530	9606.ENSP00000263181	0	0	0	0	0.811	0.183	0	0.484	0.913
BUB1	SGOL1	9606.ENSP00000302530	9606.ENSP00000263753	0	0	0	0	0.855	0.057	0	0.869	0.98
BUB1	NEIL3	9606.ENSP00000302530	9606.ENSP00000264596	0	0	0	0	0.708	0	0	0.096	0.725
BUB1	DEPDC1B	9606.ENSP00000302530	9606.ENSP00000265036	0	0	0	0	0.769	0	0	0.204	0.808
BUB1	CENPE	9606.ENSP00000302530	9606.ENSP00000265148	0	0	0	0	0.938	0.502	0	0.907	0.996
BUB1	NUF2	9606.ENSP00000302530	9606.ENSP00000271452	0	0	0	0	0.891	0.77	0	0.811	0.994
BUB1	CCNA2	9606.ENSP00000302530	9606.ENSP00000274026	0	0	0	0	0.97	0.077	0	0.691	0.99
BUB1	CENPU	9606.ENSP00000302530	9606.ENSP00000281453	0	0	0	0	0.787	0	0	0.519	0.893
BUB1	SKA1	9606.ENSP00000302530	9606.ENSP00000285116	0	0	0	0	0.719	0	0.72	0.596	0.965
BUB1	CCNB2	9606.ENSP00000302530	9606.ENSP00000288207	0	0	0	0	0.975	0.101	0	0.814	0.995
BUB1	MELK	9606.ENSP00000302530	9606.ENSP00000298048	0	0	0	0	0.951	0.057	0	0.601	0.98
BUB1	KIAA0101	9606.ENSP00000302530	9606.ENSP00000300035	0	0	0	0	0.922	0	0	0.186	0.934
BUB1	E2F7	9606.ENSP00000302530	9606.ENSP00000323246	0	0	0	0	0.609	0	0	0.273	0.704
BUB1	CHAF1B	9606.ENSP00000302530	9606.ENSP00000315700	0	0	0	0	0.648	0	0	0.264	0.73
BUB1	CLSPN	9606.ENSP00000302530	9606.ENSP00000312995	0	0	0	0	0.634	0	0	0.314	0.739
BUB1	TACC3	9606.ENSP00000302530	9606.ENSP00000326550	0	0	0	0	0.631	0	0	0.334	0.744
BUB1	ERCC6L	9606.ENSP00000302530	9606.ENSP00000334675	0	0	0	0	0.598	0.072	0	0.4	0.756
BUB1	CENPK	9606.ENSP00000302530	9606.ENSP00000379911	0	0	0	0	0.7	0	0	0.41	0.815
BUB1	FAM83D	9606.ENSP00000302530	9606.ENSP00000481110	0	0	0	0	0.75	0	0	0.324	0.824
BUB1	CKAP2L	9606.ENSP00000302530	9606.ENSP00000305204	0	0	0	0	0.767	0	0	0.329	0.837
BUB1	ORC1	9606.ENSP00000302530	9606.ENSP00000360623	0	0	0	0	0.787	0.102	0	0.279	0.85
BUB1	E2F8	9606.ENSP00000302530	9606.ENSP00000481103	0	0	0	0	0.823	0	0	0.267	0.865
BUB1	SHCBP1	9606.ENSP00000302530	9606.ENSP00000306473	0	0	0	0	0.861	0	0	0.073	0.865
BUB1	CDCA2	9606.ENSP00000302530	9606.ENSP00000328228	0	0	0	0	0.763	0	0	0.467	0.868
BUB1	DEPDC1	9606.ENSP00000302530	9606.ENSP00000412292	0	0	0	0	0.855	0	0	0.213	0.881
BUB1	EXO1	9606.ENSP00000302530	9606.ENSP00000355506	0	0	0	0	0.839	0.065	0	0.289	0.884
BUB1	TYMS	9606.ENSP00000302530	9606.ENSP00000315644	0	0	0	0	0.849	0	0	0.325	0.894
BUB1	GSG2	9606.ENSP00000302530	9606.ENSP00000325290	0	0	0	0	0.449	0.122	0	0.828	0.909
BUB1	CDC25C	9606.ENSP00000302530	9606.ENSP00000321656	0	0	0	0	0.8	0	0	0.571	0.91
BUB1	CDKN3	9606.ENSP00000302530	9606.ENSP00000335357	0	0	0	0	0.903	0.056	0	0.292	0.93
BUB1	SPC24	9606.ENSP00000302530	9606.ENSP00000465075	0	0	0	0	0.334	0.766	0	0.642	0.939
BUB1	HJURP	9606.ENSP00000302530	9606.ENSP00000414109	0	0	0	0	0.918	0	0	0.366	0.946
BUB1	RRM2	9606.ENSP00000302530	9606.ENSP00000353770	0	0	0	0	0.912	0	0	0.454	0.95
BUB1	PTTG1	9606.ENSP00000302530	9606.ENSP00000377536	0	0	0	0	0.85	0	0	0.739	0.959
BUB1	CDC45	9606.ENSP00000302530	9606.ENSP00000405726	0	0	0	0	0.916	0.056	0	0.563	0.962
BUB1	CEP55	9606.ENSP00000302530	9606.ENSP00000360540	0	0	0	0	0.935	0	0	0.505	0.966
BUB1	PBK	9606.ENSP00000302530	9606.ENSP00000428489	0	0	0	0	0.944	0.063	0	0.467	0.97
BUB1	CENPA	9606.ENSP00000302530	9606.ENSP00000336868	0	0	0	0	0.895	0.164	0	0.714	0.973
BUB1	NEK2	9606.ENSP00000302530	9606.ENSP00000355966	0	0	0	0	0.931	0	0	0.637	0.973
BUB1	UBE2C	9606.ENSP00000302530	9606.ENSP00000348838	0	0	0	0	0.937	0	0	0.603	0.974
BUB1	KIF2C	9606.ENSP00000302530	9606.ENSP00000361298	0	0	0	0	0.944	0.183	0	0.786	0.989
BUB1	KIF4A	9606.ENSP00000302530	9606.ENSP00000363524	0	0	0	0	0.959	0.183	0	0.721	0.99
BUB1	TOP2A	9606.ENSP00000302530	9606.ENSP00000411532	0	0	0	0	0.975	0.056	0	0.673	0.991
BUB1	KIF20A	9606.ENSP00000302530	9606.ENSP00000378356	0	0	0	0	0.975	0.378	0	0.547	0.992
BUB1	CDCA8	9606.ENSP00000302530	9606.ENSP00000362146	0	0	0	0	0.935	0	0.9	0.797	0.998
BUB1	CDC20	9606.ENSP00000302530	9606.ENSP00000361540	0	0	0	0	0.967	0.964	0	0.984	0.999
BUB1	TTK	9606.ENSP00000302530	9606.ENSP00000358813	0	0	0	0	0.974	0.65	0	0.896	0.999
C1R	SERPING1	9606.ENSP00000438615	9606.ENSP00000278407	0	0	0	0	0.698	0.33	0.8	0.986	0.999
C1R	C1S	9606.ENSP00000438615	9606.ENSP00000385035	0	0	0	0.879	0.873	0.972	0.9	0.991	0.999
C1R	COLEC11	9606.ENSP00000438615	9606.ENSP00000411770	0	0	0	0	0.062	0	0.5	0.603	0.797
C1RL	CD163	9606.ENSP00000266542	9606.ENSP00000352071	0	0	0	0	0.062	0	0	0.733	0.738
C1S	SERPING1	9606.ENSP00000385035	9606.ENSP00000278407	0	0	0	0	0.445	0.507	0.8	0.988	0.999
C1S	CFH	9606.ENSP00000385035	9606.ENSP00000356399	0	0	0	0	0.249	0	0	0.639	0.717
C1S	COLEC11	9606.ENSP00000385035	9606.ENSP00000411770	0	0	0	0	0.063	0	0.5	0.601	0.796
CA9	SLC16A3	9606.ENSP00000367608	9606.ENSP00000463978	0	0	0	0	0.076	0	0	0.718	0.728
CA9	VEGFA	9606.ENSP00000367608	9606.ENSP00000478570	0	0	0	0	0.088	0	0	0.719	0.732
CACNG2	GRIK1	9606.ENSP00000300105	9606.ENSP00000382791	0	0	0	0	0.096	0.212	0.54	0.407	0.78
CACNG2	GRIN3A	9606.ENSP00000300105	9606.ENSP00000355155	0	0	0	0	0.065	0.212	0.72	0.254	0.825
CARD16	SERPINA5	9606.ENSP00000364858	9606.ENSP00000333203	0	0	0	0	0	0	0.9	0.043	0.9
CCL18	CCR5	9606.ENSP00000479955	9606.ENSP00000292303	0	0	0	0	0.265	0	0.6	0.469	0.83
CCL18	CD163	9606.ENSP00000479955	9606.ENSP00000352071	0	0	0	0	0.255	0	0	0.726	0.787
CCL18	CXCL9	9606.ENSP00000479955	9606.ENSP00000354901	0	0	0	0	0.35	0	0	0.627	0.747
CCL20	CSF3	9606.ENSP00000351671	9606.ENSP00000225474	0	0	0	0	0.158	0	0.9	0.601	0.963
CCL20	LIF	9606.ENSP00000351671	9606.ENSP00000249075	0	0	0	0	0.14	0	0.9	0.268	0.931
CCL20	CCR5	9606.ENSP00000351671	9606.ENSP00000292303	0	0	0	0	0	0	0.6	0.696	0.873
CCL20	CXCL10	9606.ENSP00000351671	9606.ENSP00000305651	0	0	0	0	0.143	0	0.6	0.764	0.912
CCL20	CXCL8	9606.ENSP00000351671	9606.ENSP00000306512	0	0	0	0	0.553	0	0.6	0.818	0.964
CCL20	CXCL11	9606.ENSP00000351671	9606.ENSP00000306884	0	0	0	0	0.088	0.274	0	0.701	0.785
CCL20	CXCL9	9606.ENSP00000351671	9606.ENSP00000354901	0	0	0	0	0.097	0	0	0.725	0.741
CCL20	CCL5	9606.ENSP00000351671	9606.ENSP00000474412	0	0	0	0	0.133	0.284	0.6	0.77	0.935
CCL20	IL6	9606.ENSP00000351671	9606.ENSP00000385675	0	0	0	0	0.245	0	0.9	0.757	0.98
CCL5	CSF3	9606.ENSP00000474412	9606.ENSP00000225474	0	0	0	0	0	0	0.9	0.839	0.983
CCL5	TNFAIP6	9606.ENSP00000474412	9606.ENSP00000243347	0	0	0	0	0	0.68	0	0.461	0.82
CCL5	LIF	9606.ENSP00000474412	9606.ENSP00000249075	0	0	0	0	0	0	0.9	0.457	0.943
CCL5	GZMA	9606.ENSP00000474412	9606.ENSP00000274306	0	0	0	0	0.566	0	0	0.5	0.774
CCL5	IL9	9606.ENSP00000474412	9606.ENSP00000274520	0	0	0	0	0	0	0	0.811	0.811
CCL5	CCR5	9606.ENSP00000474412	9606.ENSP00000292303	0	0	0	0	0.181	0.973	0.8	0.995	0.999
CCL5	CXCL10	9606.ENSP00000474412	9606.ENSP00000305651	0	0	0	0	0.306	0.248	0.6	0.908	0.978
CCL5	CXCL8	9606.ENSP00000474412	9606.ENSP00000306512	0	0	0	0	0.065	0.281	0.6	0.888	0.966
CCL5	CXCL11	9606.ENSP00000474412	9606.ENSP00000306884	0	0	0	0	0.153	0.237	0	0.781	0.846
CCL5	DPP4	9606.ENSP00000474412	9606.ENSP00000353731	0	0	0	0	0.062	0.463	0	0.573	0.766
CCL5	CXCL9	9606.ENSP00000474412	9606.ENSP00000354901	0	0	0	0	0.265	0.248	0	0.861	0.917
CCL5	SDC1	9606.ENSP00000474412	9606.ENSP00000370542	0	0	0	0	0.062	0.27	0.9	0.455	0.957
CCL5	IL6	9606.ENSP00000474412	9606.ENSP00000385675	0	0	0	0	0.065	0	0.9	0.883	0.988
CCL5	PRF1	9606.ENSP00000474412	9606.ENSP00000398568	0	0	0	0	0.294	0	0	0.601	0.706
CCL5	VEGFA	9606.ENSP00000474412	9606.ENSP00000478570	0	0	0	0	0	0	0	0.755	0.755
CCNA2	CDC6	9606.ENSP00000274026	9606.ENSP00000209728	0	0	0	0	0.916	0.945	0.9	0.831	0.999
CCNA2	MYBL2	9606.ENSP00000274026	9606.ENSP00000217026	0	0	0	0	0.59	0.307	0.8	0.653	0.977
CCNA2	DLGAP5	9606.ENSP00000274026	9606.ENSP00000247191	0	0	0	0	0.967	0	0	0.465	0.981
CCNA2	FAM64A	9606.ENSP00000274026	9606.ENSP00000250056	0	0	0	0	0.803	0	0	0.298	0.856
CCNA2	NCAPG	9606.ENSP00000274026	9606.ENSP00000251496	0	0	0	0	0.958	0	0	0.461	0.976
CCNA2	CCNB1	9606.ENSP00000274026	9606.ENSP00000256442	0	0	0	0.738	0.969	0.54	0.72	0.915	0.996
CCNA2	CDK4	9606.ENSP00000274026	9606.ENSP00000257904	0	0.003	0	0	0.183	0.587	0.9	0.946	0.997
CCNA2	TROAP	9606.ENSP00000274026	9606.ENSP00000257909	0	0	0	0	0.869	0	0	0.166	0.886
CCNA2	KIF23	9606.ENSP00000274026	9606.ENSP00000260363	0	0	0	0	0.936	0.139	0	0.475	0.969
CCNA2	NDC80	9606.ENSP00000274026	9606.ENSP00000261597	0	0	0	0	0.967	0	0	0.357	0.978
CCNA2	KIF18A	9606.ENSP00000274026	9606.ENSP00000263181	0	0	0	0	0.787	0.151	0	0.248	0.852
CCNA2	SGOL1	9606.ENSP00000274026	9606.ENSP00000263753	0	0	0	0	0.868	0.056	0	0.31	0.907
CCNA2	NEIL3	9606.ENSP00000274026	9606.ENSP00000264596	0	0	0	0	0.725	0	0	0.09	0.739
CCNA2	CENPE	9606.ENSP00000274026	9606.ENSP00000265148	0	0	0	0	0.963	0.151	0	0.511	0.983
CCNA2	NUF2	9606.ENSP00000274026	9606.ENSP00000271452	0	0	0	0	0.879	0	0	0.374	0.921
CCNA2	ERCC6L	9606.ENSP00000274026	9606.ENSP00000334675	0	0	0	0	0.656	0.117	0	0.193	0.734
CCNA2	CDCA2	9606.ENSP00000274026	9606.ENSP00000328228	0	0	0	0	0.634	0	0	0.338	0.747
CCNA2	FAM83D	9606.ENSP00000274026	9606.ENSP00000481110	0	0	0	0	0.741	0	0	0.181	0.779
CCNA2	TK1	9606.ENSP00000274026	9606.ENSP00000301634	0	0	0	0	0.696	0	0	0.391	0.807
CCNA2	CENPU	9606.ENSP00000274026	9606.ENSP00000281453	0	0	0	0	0.782	0	0	0.182	0.814
CCNA2	CKAP2L	9606.ENSP00000274026	9606.ENSP00000305204	0	0	0	0	0.818	0	0	0.075	0.825
CCNA2	SPC24	9606.ENSP00000274026	9606.ENSP00000465075	0	0	0	0	0.799	0	0	0.176	0.827
CCNA2	SKA1	9606.ENSP00000274026	9606.ENSP00000285116	0	0	0	0	0.814	0	0	0.245	0.854
CCNA2	DEPDC1	9606.ENSP00000274026	9606.ENSP00000412292	0	0	0	0	0.875	0	0	0.095	0.882
CCNA2	E2F7	9606.ENSP00000274026	9606.ENSP00000323246	0	0	0	0	0.618	0.171	0	0.666	0.885
CCNA2	EXO1	9606.ENSP00000274026	9606.ENSP00000355506	0	0	0	0	0.813	0.346	0	0.299	0.907
CCNA2	TYMS	9606.ENSP00000274026	9606.ENSP00000315644	0	0	0	0	0.837	0	0	0.456	0.907
CCNA2	CENPA	9606.ENSP00000274026	9606.ENSP00000336868	0	0	0	0	0.833	0.071	0	0.463	0.909
CCNA2	HJURP	9606.ENSP00000274026	9606.ENSP00000414109	0	0	0	0	0.904	0	0	0.264	0.926
CCNA2	CDC45	9606.ENSP00000274026	9606.ENSP00000405726	0	0	0	0	0.818	0.078	0	0.603	0.927
CCNA2	TACC3	9606.ENSP00000274026	9606.ENSP00000326550	0	0	0	0	0.916	0	0	0.213	0.931
CCNA2	SHCBP1	9606.ENSP00000274026	9606.ENSP00000306473	0	0	0	0	0.926	0	0	0.258	0.943
CCNA2	E2F8	9606.ENSP00000274026	9606.ENSP00000481103	0	0	0	0	0.821	0.171	0	0.667	0.946
CCNA2	KIF4A	9606.ENSP00000274026	9606.ENSP00000363524	0	0	0	0	0.921	0.139	0	0.382	0.954
CCNA2	CEP55	9606.ENSP00000274026	9606.ENSP00000360540	0	0	0	0	0.942	0	0	0.33	0.959
CCNA2	PTTG1	9606.ENSP00000274026	9606.ENSP00000377536	0	0	0	0	0.896	0	0	0.634	0.96
CCNA2	MELK	9606.ENSP00000274026	9606.ENSP00000298048	0	0	0	0	0.93	0.155	0	0.393	0.961
CCNA2	RRM2	9606.ENSP00000274026	9606.ENSP00000353770	0	0	0	0	0.93	0	0	0.522	0.965
CCNA2	KIF2C	9606.ENSP00000274026	9606.ENSP00000361298	0	0	0	0	0.932	0.139	0	0.468	0.966
CCNA2	KIAA0101	9606.ENSP00000274026	9606.ENSP00000300035	0	0	0	0	0.959	0	0	0.249	0.967
CCNA2	NEK2	9606.ENSP00000274026	9606.ENSP00000355966	0	0	0	0	0.918	0	0	0.621	0.967
CCNA2	PBK	9606.ENSP00000274026	9606.ENSP00000428489	0	0	0	0	0.949	0.103	0	0.361	0.968
CCNA2	KIF20A	9606.ENSP00000274026	9606.ENSP00000378356	0	0	0	0	0.938	0.139	0	0.468	0.969
CCNA2	CDKN3	9606.ENSP00000274026	9606.ENSP00000335357	0	0	0	0	0.886	0.085	0	0.79	0.976
CCNA2	WEE1	9606.ENSP00000274026	9606.ENSP00000402084	0	0	0	0	0.213	0.216	0.9	0.714	0.98
CCNA2	CDC25C	9606.ENSP00000274026	9606.ENSP00000321656	0	0	0	0	0.699	0.31	0.65	0.811	0.984
CCNA2	CDCA8	9606.ENSP00000274026	9606.ENSP00000362146	0	0	0	0	0.973	0	0	0.477	0.985
CCNA2	TOP2A	9606.ENSP00000274026	9606.ENSP00000411532	0	0	0	0	0.967	0.056	0	0.575	0.985
CCNA2	TTK	9606.ENSP00000274026	9606.ENSP00000358813	0	0	0	0	0.979	0.067	0	0.485	0.989
CCNA2	CCNB2	9606.ENSP00000274026	9606.ENSP00000288207	0	0	0	0.743	0.968	0.181	0.54	0.837	0.989
CCNA2	UBE2C	9606.ENSP00000274026	9606.ENSP00000348838	0	0	0	0	0.955	0.346	0.6	0.652	0.995
CCNA2	ORC1	9606.ENSP00000274026	9606.ENSP00000360623	0	0	0	0	0.758	0.795	0.9	0.602	0.997
CCNA2	CDC20	9606.ENSP00000274026	9606.ENSP00000361540	0	0	0	0	0.984	0.979	0.6	0.926	0.999
CCNB1	CDC6	9606.ENSP00000256442	9606.ENSP00000209728	0	0	0	0	0.813	0.757	0	0.78	0.989
CCNB1	MYBL2	9606.ENSP00000256442	9606.ENSP00000217026	0	0	0	0	0.575	0.156	0.9	0.624	0.984
CCNB1	DLGAP5	9606.ENSP00000256442	9606.ENSP00000247191	0	0	0	0	0.976	0	0	0.525	0.988
CCNB1	FAM64A	9606.ENSP00000256442	9606.ENSP00000250056	0	0	0	0	0.766	0	0	0.171	0.798
CCNB1	NCAPG	9606.ENSP00000256442	9606.ENSP00000251496	0	0	0	0	0.868	0	0.9	0.621	0.994
CCNB1	E2F7	9606.ENSP00000256442	9606.ENSP00000323246	0	0	0	0	0.421	0.171	0	0.482	0.729
CCNB1	TROAP	9606.ENSP00000256442	9606.ENSP00000257909	0	0	0	0	0.717	0	0	0.189	0.76
CCNB1	TK1	9606.ENSP00000256442	9606.ENSP00000301634	0	0	0	0	0.645	0	0	0.4	0.778
CCNB1	CDCA2	9606.ENSP00000256442	9606.ENSP00000328228	0	0	0	0	0.66	0	0	0.396	0.786
CCNB1	CENPU	9606.ENSP00000256442	9606.ENSP00000281453	0	0	0	0	0.724	0	0	0.283	0.794
CCNB1	DEPDC1	9606.ENSP00000256442	9606.ENSP00000412292	0	0	0	0	0.725	0	0	0.287	0.795
CCNB1	KIF18A	9606.ENSP00000256442	9606.ENSP00000263181	0	0	0	0	0.666	0.139	0	0.379	0.806
CCNB1	SHCBP1	9606.ENSP00000256442	9606.ENSP00000306473	0	0	0	0	0.775	0	0	0.23	0.819
CCNB1	SGOL1	9606.ENSP00000256442	9606.ENSP00000263753	0	0	0	0	0.717	0.057	0	0.393	0.823
CCNB1	HJURP	9606.ENSP00000256442	9606.ENSP00000414109	0	0	0	0	0.806	0	0	0.213	0.841
CCNB1	TYMS	9606.ENSP00000256442	9606.ENSP00000315644	0	0	0	0	0.725	0	0	0.456	0.844
CCNB1	EXO1	9606.ENSP00000256442	9606.ENSP00000355506	0	0	0	0	0.721	0.346	0	0.282	0.857
CCNB1	ORC1	9606.ENSP00000256442	9606.ENSP00000360623	0	0	0	0	0.434	0.232	0.6	0.361	0.874
CCNB1	SPC24	9606.ENSP00000256442	9606.ENSP00000465075	0	0	0	0	0.844	0	0	0.231	0.875
CCNB1	TACC3	9606.ENSP00000256442	9606.ENSP00000326550	0	0	0	0	0.801	0	0	0.424	0.88
CCNB1	NUF2	9606.ENSP00000256442	9606.ENSP00000271452	0	0	0	0	0.816	0	0	0.466	0.897
CCNB1	CENPA	9606.ENSP00000256442	9606.ENSP00000336868	0	0	0	0	0.788	0.071	0	0.567	0.907
CCNB1	CDC45	9606.ENSP00000256442	9606.ENSP00000405726	0	0	0	0	0.803	0.102	0	0.519	0.908
CCNB1	LPIN3	9606.ENSP00000256442	9606.ENSP00000362354	0	0	0	0	0	0	0.9	0.138	0.91
CCNB1	KIAA0101	9606.ENSP00000256442	9606.ENSP00000300035	0	0	0	0	0.892	0	0	0.308	0.922
CCNB1	HIST1H2BJ	9606.ENSP00000256442	9606.ENSP00000476136	0	0	0	0	0.096	0.058	0.9	0.207	0.923
CCNB1	CEP55	9606.ENSP00000256442	9606.ENSP00000360540	0	0	0	0	0.864	0	0	0.508	0.93
CCNB1	CENPE	9606.ENSP00000256442	9606.ENSP00000265148	0	0	0	0	0.829	0.139	0	0.658	0.945
CCNB1	CDKN3	9606.ENSP00000256442	9606.ENSP00000335357	0	0	0	0	0.867	0.153	0	0.598	0.951
CCNB1	TTK	9606.ENSP00000256442	9606.ENSP00000358813	0	0	0	0	0.875	0.103	0	0.623	0.954
CCNB1	NEK2	9606.ENSP00000256442	9606.ENSP00000355966	0	0	0	0	0.897	0	0	0.595	0.956
CCNB1	KIF4A	9606.ENSP00000256442	9606.ENSP00000363524	0	0	0	0	0.888	0.139	0	0.586	0.957
CCNB1	RRM2	9606.ENSP00000256442	9606.ENSP00000353770	0	0	0	0	0.902	0	0	0.593	0.958
CCNB1	SKA1	9606.ENSP00000256442	9606.ENSP00000285116	0	0	0	0	0.809	0	0.72	0.336	0.961
CCNB1	MELK	9606.ENSP00000256442	9606.ENSP00000298048	0	0	0	0	0.921	0.183	0	0.471	0.963
CCNB1	ERCC6L	9606.ENSP00000256442	9606.ENSP00000334675	0	0	0	0	0.582	0.117	0.9	0.249	0.968
CCNB1	KIF2C	9606.ENSP00000256442	9606.ENSP00000361298	0	0	0	0	0.929	0.139	0	0.543	0.969
CCNB1	PBK	9606.ENSP00000256442	9606.ENSP00000428489	0	0	0	0	0.936	0.263	0	0.494	0.974
CCNB1	PTTG1	9606.ENSP00000256442	9606.ENSP00000377536	0	0	0	0	0.929	0	0	0.792	0.984
CCNB1	CDCA8	9606.ENSP00000256442	9606.ENSP00000362146	0	0	0	0	0.968	0	0	0.553	0.985
CCNB1	KIF20A	9606.ENSP00000256442	9606.ENSP00000378356	0	0	0	0	0.964	0.139	0	0.611	0.986
CCNB1	KIF23	9606.ENSP00000256442	9606.ENSP00000260363	0	0	0	0	0.952	0.139	0	0.69	0.986
CCNB1	TOP2A	9606.ENSP00000256442	9606.ENSP00000411532	0	0	0	0	0.964	0.056	0	0.689	0.988
CCNB1	WEE1	9606.ENSP00000256442	9606.ENSP00000402084	0	0	0	0	0.213	0.216	0.9	0.839	0.988
CCNB1	CDK4	9606.ENSP00000256442	9606.ENSP00000257904	0	0	0	0	0.213	0.23	0.9	0.895	0.992
CCNB1	NDC80	9606.ENSP00000256442	9606.ENSP00000261597	0	0	0	0	0.916	0.271	0.72	0.593	0.992
CCNB1	UBE2C	9606.ENSP00000256442	9606.ENSP00000348838	0	0	0	0	0.922	0.346	0.6	0.716	0.993
CCNB1	CCNB2	9606.ENSP00000256442	9606.ENSP00000288207	0	0	0	0.943	0.955	0.754	0.9	0.856	0.998
CCNB1	CDC25C	9606.ENSP00000256442	9606.ENSP00000321656	0	0	0	0	0.778	0.528	0.9	0.91	0.998
CCNB1	CDC20	9606.ENSP00000256442	9606.ENSP00000361540	0	0	0	0	0.971	0.97	0.6	0.947	0.999
CCNB2	CDC6	9606.ENSP00000288207	9606.ENSP00000209728	0	0	0	0	0.753	0.682	0	0.73	0.976
CCNB2	MYBL2	9606.ENSP00000288207	9606.ENSP00000217026	0	0	0	0	0.603	0.156	0.9	0.479	0.98
CCNB2	DLGAP5	9606.ENSP00000288207	9606.ENSP00000247191	0	0	0	0	0.976	0	0	0.493	0.987
CCNB2	FAM64A	9606.ENSP00000288207	9606.ENSP00000250056	0	0	0	0	0.805	0	0	0.166	0.83
CCNB2	NCAPG	9606.ENSP00000288207	9606.ENSP00000251496	0	0	0	0	0.936	0	0.9	0.517	0.996
CCNB2	CDK4	9606.ENSP00000288207	9606.ENSP00000257904	0	0	0	0	0.199	0.23	0.9	0.681	0.977
CCNB2	TROAP	9606.ENSP00000288207	9606.ENSP00000257909	0	0	0	0	0.875	0	0	0.182	0.893
CCNB2	KIF23	9606.ENSP00000288207	9606.ENSP00000260363	0	0	0	0	0.954	0.139	0	0.706	0.987
CCNB2	NDC80	9606.ENSP00000288207	9606.ENSP00000261597	0	0	0	0	0.959	0	0	0.441	0.976
CCNB2	KIF18A	9606.ENSP00000288207	9606.ENSP00000263181	0	0	0	0	0.599	0.139	0	0.356	0.758
CCNB2	SGOL1	9606.ENSP00000288207	9606.ENSP00000263753	0	0	0	0	0.855	0.057	0	0.272	0.891
CCNB2	CENPE	9606.ENSP00000288207	9606.ENSP00000265148	0	0	0	0	0.871	0.139	0	0.58	0.949
CCNB2	NUF2	9606.ENSP00000288207	9606.ENSP00000271452	0	0	0	0	0.886	0	0	0.424	0.932
CCNB2	CENPU	9606.ENSP00000288207	9606.ENSP00000281453	0	0	0	0	0.758	0	0	0.293	0.822
CCNB2	SKA1	9606.ENSP00000288207	9606.ENSP00000285116	0	0	0	0	0.746	0	0	0.279	0.809
CCNB2	FAM83D	9606.ENSP00000288207	9606.ENSP00000481110	0	0	0	0	0.648	0	0	0.215	0.712
CCNB2	TK1	9606.ENSP00000288207	9606.ENSP00000301634	0	0	0	0	0.641	0	0	0.316	0.744
CCNB2	E2F8	9606.ENSP00000288207	9606.ENSP00000481103	0	0	0	0	0.569	0.171	0	0.351	0.748
CCNB2	WEE1	9606.ENSP00000288207	9606.ENSP00000402084	0	0	0	0	0.242	0.216	0	0.638	0.766
CCNB2	CDCA2	9606.ENSP00000288207	9606.ENSP00000328228	0	0	0	0	0.598	0	0	0.445	0.768
CCNB2	ORC1	9606.ENSP00000288207	9606.ENSP00000360623	0	0	0	0	0.608	0.232	0	0.311	0.774
CCNB2	DEPDC1	9606.ENSP00000288207	9606.ENSP00000412292	0	0	0	0	0.704	0	0	0.269	0.775
CCNB2	EXO1	9606.ENSP00000288207	9606.ENSP00000355506	0	0	0	0	0.724	0.141	0	0.271	0.812
CCNB2	TACC3	9606.ENSP00000288207	9606.ENSP00000326550	0	0	0	0	0.764	0	0	0.375	0.847
CCNB2	TYMS	9606.ENSP00000288207	9606.ENSP00000315644	0	0	0	0	0.833	0	0	0.309	0.88
CCNB2	SHCBP1	9606.ENSP00000288207	9606.ENSP00000306473	0	0	0	0	0.871	0	0	0.108	0.88
CCNB2	CENPA	9606.ENSP00000288207	9606.ENSP00000336868	0	0	0	0	0.81	0.071	0	0.524	0.908
CCNB2	CEP55	9606.ENSP00000288207	9606.ENSP00000360540	0	0	0	0	0.852	0	0	0.468	0.918
CCNB2	HJURP	9606.ENSP00000288207	9606.ENSP00000414109	0	0	0	0	0.901	0	0	0.247	0.922
CCNB2	CDKN3	9606.ENSP00000288207	9606.ENSP00000335357	0	0	0	0	0.858	0.153	0	0.404	0.922
CCNB2	CDC45	9606.ENSP00000288207	9606.ENSP00000405726	0	0	0	0	0.865	0.102	0	0.601	0.947
CCNB2	KIAA0101	9606.ENSP00000288207	9606.ENSP00000300035	0	0	0	0	0.936	0	0	0.294	0.953
CCNB2	RRM2	9606.ENSP00000288207	9606.ENSP00000353770	0	0	0	0	0.909	0	0	0.587	0.961
CCNB2	MELK	9606.ENSP00000288207	9606.ENSP00000298048	0	0	0	0	0.918	0.183	0	0.523	0.965
CCNB2	KIF2C	9606.ENSP00000288207	9606.ENSP00000361298	0	0	0	0	0.913	0.139	0	0.581	0.966
CCNB2	KIF4A	9606.ENSP00000288207	9606.ENSP00000363524	0	0	0	0	0.922	0.139	0	0.534	0.966
CCNB2	PBK	9606.ENSP00000288207	9606.ENSP00000428489	0	0	0	0	0.95	0.103	0	0.391	0.97
CCNB2	CDCA8	9606.ENSP00000288207	9606.ENSP00000362146	0	0	0	0	0.936	0	0	0.591	0.972
CCNB2	PTTG1	9606.ENSP00000288207	9606.ENSP00000377536	0	0	0	0	0.934	0	0	0.631	0.974
CCNB2	TTK	9606.ENSP00000288207	9606.ENSP00000358813	0	0	0	0	0.935	0.103	0	0.655	0.978
CCNB2	NEK2	9606.ENSP00000288207	9606.ENSP00000355966	0	0	0	0	0.956	0	0	0.564	0.98
CCNB2	KIF20A	9606.ENSP00000288207	9606.ENSP00000378356	0	0	0	0	0.952	0.139	0	0.624	0.983
CCNB2	TOP2A	9606.ENSP00000288207	9606.ENSP00000411532	0	0	0	0	0.969	0.056	0	0.714	0.991
CCNB2	CDC25C	9606.ENSP00000288207	9606.ENSP00000321656	0	0	0	0	0.793	0.238	0.8	0.801	0.992
CCNB2	UBE2C	9606.ENSP00000288207	9606.ENSP00000348838	0	0	0	0	0.976	0.142	0	0.692	0.993
CCNB2	CDC20	9606.ENSP00000288207	9606.ENSP00000361540	0	0	0	0	0.988	0.672	0.6	0.894	0.999
CCR5	CXCL6	9606.ENSP00000292303	9606.ENSP00000226317	0	0	0	0	0.06	0	0.6	0.298	0.713
CCR5	IL1RN	9606.ENSP00000292303	9606.ENSP00000259206	0	0	0	0	0.23	0	0.9	0.334	0.944
CCR5	CXCL13	9606.ENSP00000292303	9606.ENSP00000286758	0	0	0	0	0.108	0	0.6	0.654	0.866
CCR5	CD2	9606.ENSP00000292303	9606.ENSP00000358490	0	0	0	0	0.551	0	0	0.39	0.714
CCR5	CXCL14	9606.ENSP00000292303	9606.ENSP00000337065	0	0	0	0	0	0	0.6	0.346	0.727
CCR5	CD163	9606.ENSP00000292303	9606.ENSP00000352071	0	0	0	0	0.523	0	0	0.514	0.758
CCR5	FCGR3A	9606.ENSP00000292303	9606.ENSP00000356946	0	0	0	0	0.397	0	0	0.653	0.781
CCR5	CXCL11	9606.ENSP00000292303	9606.ENSP00000306884	0	0	0	0	0.136	0	0.6	0.762	0.911
CCR5	CXCL8	9606.ENSP00000292303	9606.ENSP00000306512	0	0	0	0	0.086	0	0.6	0.795	0.918
CCR5	CXCL9	9606.ENSP00000292303	9606.ENSP00000354901	0	0	0	0	0.336	0	0.6	0.753	0.928
CCR5	CXCL10	9606.ENSP00000292303	9606.ENSP00000305651	0	0	0	0	0.225	0	0.6	0.84	0.946
CD163	F13A1	9606.ENSP00000352071	9606.ENSP00000264870	0	0	0	0	0.684	0	0	0.341	0.783
CD163	FN1	9606.ENSP00000352071	9606.ENSP00000346839	0	0	0	0	0	0	0	0.716	0.716
CD163	HP	9606.ENSP00000352071	9606.ENSP00000348170	0	0	0	0	0.062	0.213	0.6	0.995	0.998
CD163	S100A9	9606.ENSP00000352071	9606.ENSP00000357727	0	0	0	0	0.189	0	0	0.656	0.709
CD163	FCGR3A	9606.ENSP00000352071	9606.ENSP00000356946	0	0	0	0	0.551	0	0	0.705	0.861
CD163	IL6	9606.ENSP00000352071	9606.ENSP00000385675	0	0	0	0	0	0	0.9	0.71	0.969
CD2	IL2RB	9606.ENSP00000358490	9606.ENSP00000216223	0	0	0	0	0.563	0	0	0.501	0.772
CD2	GZMH	9606.ENSP00000358490	9606.ENSP00000216338	0	0	0	0	0.728	0	0	0.247	0.787
CD2	GZMA	9606.ENSP00000358490	9606.ENSP00000274306	0	0	0	0	0.826	0	0	0.393	0.89
CD2	CD3D	9606.ENSP00000358490	9606.ENSP00000300692	0	0	0	0	0.784	0	0	0.556	0.9
CD2	IL7R	9606.ENSP00000358490	9606.ENSP00000306157	0	0	0	0	0.551	0	0	0.517	0.773
CD2	LCK	9606.ENSP00000358490	9606.ENSP00000337825	0	0	0	0	0.402	0.487	0	0.974	0.991
CD2	CD3E	9606.ENSP00000358490	9606.ENSP00000354566	0	0	0	0	0.862	0	0	0.457	0.922
CD2	FCGR3A	9606.ENSP00000358490	9606.ENSP00000356946	0	0	0	0	0.337	0	0.9	0.923	0.994
CD2	PRF1	9606.ENSP00000358490	9606.ENSP00000398568	0	0	0	0	0.564	0	0	0.634	0.833
CD2	CD48	9606.ENSP00000358490	9606.ENSP00000484431	0	0	0	0	0.551	0.27	0	0.991	0.996
CD2	CD58	9606.ENSP00000358490	9606.ENSP00000358501	0	0	0	0	0.062	0.686	0.8	0.991	0.999
CD248	FN1	9606.ENSP00000308117	9606.ENSP00000346839	0	0	0	0	0.147	0	0	0.984	0.987
CD3D	IL2RB	9606.ENSP00000300692	9606.ENSP00000216223	0	0	0	0	0.307	0	0.9	0.34	0.95
CD3D	GZMA	9606.ENSP00000300692	9606.ENSP00000274306	0	0	0	0	0.564	0	0	0.506	0.775
CD3D	HLA-DPA1	9606.ENSP00000300692	9606.ENSP00000393566	0	0	0	0	0.097	0	0.6	0.241	0.702
CD3D	IL7R	9606.ENSP00000300692	9606.ENSP00000306157	0	0	0	0	0.217	0	0.5	0.502	0.788
CD3D	PDCD1LG2	9606.ENSP00000300692	9606.ENSP00000380855	0	0	0	0	0.062	0	0.9	0.193	0.917
CD3D	HLA-DRB1	9606.ENSP00000300692	9606.ENSP00000353099	0	0	0	0	0.11	0	0.9	0.218	0.924
CD3D	IL2RA	9606.ENSP00000300692	9606.ENSP00000369293	0	0	0	0	0.087	0	0.9	0.392	0.939
CD3D	HLA-DRA	9606.ENSP00000300692	9606.ENSP00000378786	0	0	0	0	0.097	0	0.9	0.391	0.94
CD3D	LCK	9606.ENSP00000300692	9606.ENSP00000337825	0	0	0	0	0.737	0	0.9	0.603	0.988
CD3D	CD3E	9606.ENSP00000300692	9606.ENSP00000354566	0	0	0	0	0.765	0.887	0.9	0.86	0.999
CD3E	IL2RB	9606.ENSP00000354566	9606.ENSP00000216223	0	0	0	0	0.299	0	0.9	0.491	0.961
CD3E	LCK	9606.ENSP00000354566	9606.ENSP00000337825	0	0	0	0	0.571	0.486	0.9	0.755	0.993
CD3E	FCGR2B	9606.ENSP00000354566	9606.ENSP00000351497	0	0	0	0	0.098	0	0	0.688	0.707
CD3E	HLA-DRB1	9606.ENSP00000354566	9606.ENSP00000353099	0	0	0	0	0.12	0	0.9	0.263	0.929
CD3E	HLA-DQB1	9606.ENSP00000354566	9606.ENSP00000364080	0	0	0	0	0.097	0	0.6	0.349	0.744
CD3E	HLA-DQB2	9606.ENSP00000354566	9606.ENSP00000390431	0	0	0	0	0.063	0	0.6	0.41	0.759
CD3E	PDCD1LG2	9606.ENSP00000354566	9606.ENSP00000380855	0	0	0	0	0.062	0	0.9	0.317	0.93
CD3E	HLA-DRA	9606.ENSP00000354566	9606.ENSP00000378786	0	0	0	0	0.157	0	0.9	0.322	0.937
CD3E	IL2RA	9606.ENSP00000354566	9606.ENSP00000369293	0	0	0	0	0.089	0	0.9	0.573	0.957
CD48	LCK	9606.ENSP00000484431	9606.ENSP00000337825	0	0	0	0	0.157	0.462	0	0.907	0.954
CD48	CD58	9606.ENSP00000484431	9606.ENSP00000358501	0	0	0	0	0.064	0	0	0.82	0.824
CDC20	CDC6	9606.ENSP00000361540	9606.ENSP00000209728	0	0	0	0	0.76	0.352	0	0.791	0.964
CDC20	MYBL2	9606.ENSP00000361540	9606.ENSP00000217026	0	0	0	0	0.641	0.058	0	0.467	0.804
CDC20	DLGAP5	9606.ENSP00000361540	9606.ENSP00000247191	0	0	0	0	0.981	0	0	0.567	0.991
CDC20	FAM64A	9606.ENSP00000361540	9606.ENSP00000250056	0	0	0	0	0.872	0	0	0.366	0.915
CDC20	NCAPG	9606.ENSP00000361540	9606.ENSP00000251496	0	0	0	0	0.948	0.056	0	0.547	0.976
CDC20	CDK4	9606.ENSP00000361540	9606.ENSP00000257904	0	0	0	0	0.205	0.258	0	0.542	0.706
CDC20	TROAP	9606.ENSP00000361540	9606.ENSP00000257909	0	0	0	0	0.92	0	0	0.202	0.933
CDC20	KIF23	9606.ENSP00000361540	9606.ENSP00000260363	0	0	0	0	0.971	0.102	0	0.51	0.986
CDC20	NDC80	9606.ENSP00000361540	9606.ENSP00000261597	0	0	0	0	0.973	0.056	0	0.731	0.992
CDC20	KIF18A	9606.ENSP00000361540	9606.ENSP00000263181	0	0	0	0	0.525	0.316	0	0.368	0.777
CDC20	SGOL1	9606.ENSP00000361540	9606.ENSP00000263753	0	0	0	0	0.827	0.058	0	0.592	0.927
CDC20	CENPE	9606.ENSP00000361540	9606.ENSP00000265148	0	0	0	0	0.966	0.102	0	0.824	0.994
CDC20	NUF2	9606.ENSP00000361540	9606.ENSP00000271452	0	0	0	0	0.914	0.056	0	0.623	0.967
CDC20	SKA1	9606.ENSP00000361540	9606.ENSP00000285116	0	0	0	0	0.84	0	0	0.436	0.906
CDC20	MELK	9606.ENSP00000361540	9606.ENSP00000298048	0	0	0	0	0.963	0.065	0	0.466	0.98
CDC20	KIAA0101	9606.ENSP00000361540	9606.ENSP00000300035	0	0	0	0	0.939	0	0	0.332	0.958
CDC20	TK1	9606.ENSP00000361540	9606.ENSP00000301634	0	0	0	0	0.644	0.27	0	0.455	0.846
CDC20	CKAP2L	9606.ENSP00000361540	9606.ENSP00000305204	0	0	0	0	0.781	0	0	0.287	0.837
CDC20	SHCBP1	9606.ENSP00000361540	9606.ENSP00000306473	0	0	0	0	0.865	0	0	0.062	0.868
CDC20	CLSPN	9606.ENSP00000361540	9606.ENSP00000312995	0	0	0	0	0.629	0.27	0	0.385	0.819
CDC20	TYMS	9606.ENSP00000361540	9606.ENSP00000315644	0	0	0	0	0.879	0	0	0.436	0.929
CDC20	CDC25C	9606.ENSP00000361540	9606.ENSP00000321656	0	0	0	0	0.641	0.343	0	0.67	0.915
CDC20	TACC3	9606.ENSP00000361540	9606.ENSP00000326550	0	0	0	0	0.964	0	0	0.336	0.975
CDC20	CDCA2	9606.ENSP00000361540	9606.ENSP00000328228	0	0	0	0	0.757	0	0	0.425	0.855
CDC20	CDKN3	9606.ENSP00000361540	9606.ENSP00000335357	0	0	0	0	0.825	0.216	0	0.399	0.91
CDC20	CENPA	9606.ENSP00000361540	9606.ENSP00000336868	0	0	0	0	0.781	0.127	0	0.608	0.918
CDC20	UBE2C	9606.ENSP00000361540	9606.ENSP00000348838	0	0	0	0	0.982	0.937	0.3	0.913	0.999
CDC20	RRM2	9606.ENSP00000361540	9606.ENSP00000353770	0	0	0	0	0.925	0.058	0	0.588	0.968
CDC20	NEK2	9606.ENSP00000361540	9606.ENSP00000355966	0	0	0	0	0.947	0.675	0.6	0.878	0.999
CDC20	TTK	9606.ENSP00000361540	9606.ENSP00000358813	0	0	0	0	0.982	0.375	0	0.76	0.997
CDC20	CEP55	9606.ENSP00000361540	9606.ENSP00000360540	0	0	0	0	0.898	0	0	0.561	0.953
CDC20	ORC1	9606.ENSP00000361540	9606.ENSP00000360623	0	0	0	0	0.636	0.067	0	0.298	0.741
CDC20	KIF2C	9606.ENSP00000361540	9606.ENSP00000361298	0	0	0	0	0.957	0.102	0	0.623	0.984
CDC20	DEPDC1	9606.ENSP00000361540	9606.ENSP00000412292	0	0	0	0	0.647	0	0	0.315	0.748
CDC20	WEE1	9606.ENSP00000361540	9606.ENSP00000402084	0	0	0	0	0.142	0.344	0	0.663	0.794
CDC20	FAM83D	9606.ENSP00000361540	9606.ENSP00000481110	0	0	0	0	0.761	0	0	0.253	0.813
CDC20	E2F8	9606.ENSP00000361540	9606.ENSP00000481103	0	0	0	0	0.724	0	0	0.394	0.825
CDC20	HJURP	9606.ENSP00000361540	9606.ENSP00000414109	0	0	0	0	0.891	0	0	0.369	0.928
CDC20	SPC24	9606.ENSP00000361540	9606.ENSP00000465075	0	0	0	0	0.875	0	0	0.452	0.929
CDC20	CDC45	9606.ENSP00000361540	9606.ENSP00000405726	0	0	0	0	0.86	0.056	0	0.613	0.944
CDC20	KIF4A	9606.ENSP00000361540	9606.ENSP00000363524	0	0	0	0	0.944	0.102	0	0.462	0.97
CDC20	PBK	9606.ENSP00000361540	9606.ENSP00000428489	0	0	0	0	0.962	0.071	0	0.425	0.978
CDC20	KIF20A	9606.ENSP00000361540	9606.ENSP00000378356	0	0	0	0	0.955	0.102	0	0.576	0.981
CDC20	TOP2A	9606.ENSP00000361540	9606.ENSP00000411532	0	0	0	0	0.965	0	0	0.663	0.987
CDC20	CDCA8	9606.ENSP00000361540	9606.ENSP00000362146	0	0	0	0	0.989	0	0	0.66	0.996
CDC20	PTTG1	9606.ENSP00000361540	9606.ENSP00000377536	0	0	0	0	0.931	0.914	0.6	0.957	0.999
CDC25C	CDC6	9606.ENSP00000321656	9606.ENSP00000209728	0	0	0	0	0.557	0.18	0	0.554	0.824
CDC25C	DLGAP5	9606.ENSP00000321656	9606.ENSP00000247191	0	0	0	0	0.79	0	0	0.193	0.823
CDC25C	FAM64A	9606.ENSP00000321656	9606.ENSP00000250056	0	0	0	0	0.687	0	0	0.134	0.717
CDC25C	NCAPG	9606.ENSP00000321656	9606.ENSP00000251496	0	0	0	0	0.699	0	0	0.197	0.748
CDC25C	CDK4	9606.ENSP00000321656	9606.ENSP00000257904	0	0	0	0	0.118	0.319	0	0.657	0.776
CDC25C	TROAP	9606.ENSP00000321656	9606.ENSP00000257909	0	0	0	0	0.708	0	0	0.162	0.745
CDC25C	KIF23	9606.ENSP00000321656	9606.ENSP00000260363	0	0	0	0	0.69	0.102	0	0.347	0.803
CDC25C	CENPE	9606.ENSP00000321656	9606.ENSP00000265148	0	0	0	0	0.601	0.152	0	0.343	0.759
CDC25C	MELK	9606.ENSP00000321656	9606.ENSP00000298048	0	0	0	0	0.71	0.151	0	0.289	0.81
CDC25C	CDCA2	9606.ENSP00000321656	9606.ENSP00000328228	0	0	0	0	0.577	0	0	0.319	0.7
CDC25C	CEP55	9606.ENSP00000321656	9606.ENSP00000360540	0	0	0	0	0.691	0	0	0.225	0.75
CDC25C	EXO1	9606.ENSP00000321656	9606.ENSP00000355506	0	0	0	0	0.685	0	0	0.25	0.754
CDC25C	TOP2A	9606.ENSP00000321656	9606.ENSP00000411532	0	0	0	0	0.636	0	0	0.379	0.764
CDC25C	PBK	9606.ENSP00000321656	9606.ENSP00000428489	0	0	0	0	0.718	0.072	0	0.216	0.777
CDC25C	HJURP	9606.ENSP00000321656	9606.ENSP00000414109	0	0	0	0	0.781	0	0	0.087	0.792
CDC25C	CENPA	9606.ENSP00000321656	9606.ENSP00000336868	0	0	0	0	0.722	0	0	0.288	0.793
CDC25C	TTK	9606.ENSP00000321656	9606.ENSP00000358813	0	0	0	0	0.7	0	0	0.378	0.806
CDC25C	CDCA8	9606.ENSP00000321656	9606.ENSP00000362146	0	0	0	0	0.727	0	0	0.347	0.814
CDC25C	NEK2	9606.ENSP00000321656	9606.ENSP00000355966	0	0	0	0	0.7	0	0	0.416	0.817
CDC25C	PTTG1	9606.ENSP00000321656	9606.ENSP00000377536	0	0	0	0	0.691	0	0	0.479	0.832
CDC25C	CDC45	9606.ENSP00000321656	9606.ENSP00000405726	0	0	0	0	0.691	0	0	0.506	0.841
CDC25C	UBE2C	9606.ENSP00000321656	9606.ENSP00000348838	0	0	0	0	0.753	0.06	0	0.382	0.844
CDC25C	KIF4A	9606.ENSP00000321656	9606.ENSP00000363524	0	0	0	0	0.807	0.102	0	0.181	0.846
CDC25C	KIF20A	9606.ENSP00000321656	9606.ENSP00000378356	0	0	0	0	0.796	0.102	0	0.307	0.862
CDC25C	KIF2C	9606.ENSP00000321656	9606.ENSP00000361298	0	0	0	0	0.802	0.102	0	0.337	0.872
CDC25C	CDKN3	9606.ENSP00000321656	9606.ENSP00000335357	0	0	0	0	0.692	0.365	0	0.468	0.887
CDC25C	WEE1	9606.ENSP00000321656	9606.ENSP00000402084	0	0	0	0	0.119	0.528	0	0.83	0.923
CDC45	CDC6	9606.ENSP00000405726	9606.ENSP00000209728	0	0	0	0	0.9	0.154	0.6	0.943	0.997
CDC45	DLGAP5	9606.ENSP00000405726	9606.ENSP00000247191	0	0	0	0	0.838	0	0	0.296	0.881
CDC45	FAM64A	9606.ENSP00000405726	9606.ENSP00000250056	0	0	0	0	0.686	0	0	0.15	0.721
CDC45	NCAPG	9606.ENSP00000405726	9606.ENSP00000251496	0	0	0	0	0.954	0	0	0.334	0.968
CDC45	CDK4	9606.ENSP00000405726	9606.ENSP00000257904	0	0	0	0	0.238	0.673	0	0.421	0.843
CDC45	TROAP	9606.ENSP00000405726	9606.ENSP00000257909	0	0	0	0	0.785	0	0	0.158	0.811
CDC45	KIF23	9606.ENSP00000405726	9606.ENSP00000260363	0	0	0	0	0.856	0	0	0.23	0.884
CDC45	NDC80	9606.ENSP00000405726	9606.ENSP00000261597	0	0	0	0	0.838	0	0	0.106	0.849
CDC45	NEIL3	9606.ENSP00000405726	9606.ENSP00000264596	0	0	0	0	0.581	0	0	0.393	0.734
CDC45	CENPE	9606.ENSP00000405726	9606.ENSP00000265148	0	0	0	0	0.719	0	0	0.265	0.785
CDC45	NUF2	9606.ENSP00000405726	9606.ENSP00000271452	0	0	0	0	0.877	0	0	0.269	0.906
CDC45	CENPU	9606.ENSP00000405726	9606.ENSP00000281453	0	0	0	0	0.746	0	0	0.279	0.809
CDC45	MELK	9606.ENSP00000405726	9606.ENSP00000298048	0	0	0	0	0.885	0	0	0.324	0.919
CDC45	KIAA0101	9606.ENSP00000405726	9606.ENSP00000300035	0	0	0	0	0.825	0	0	0.218	0.858
CDC45	TK1	9606.ENSP00000405726	9606.ENSP00000301634	0	0	0	0	0.699	0	0	0.216	0.754
CDC45	CLSPN	9606.ENSP00000405726	9606.ENSP00000312995	0	0	0	0	0.476	0.27	0.6	0.945	0.99
CDC45	TYMS	9606.ENSP00000405726	9606.ENSP00000315644	0	0	0	0	0.927	0.056	0	0.29	0.947
CDC45	CHAF1B	9606.ENSP00000405726	9606.ENSP00000315700	0	0	0	0	0.814	0	0	0.282	0.861
CDC45	CDKN3	9606.ENSP00000405726	9606.ENSP00000335357	0	0	0	0	0.785	0	0	0.237	0.829
CDC45	CENPA	9606.ENSP00000405726	9606.ENSP00000336868	0	0	0	0	0.792	0.056	0	0.329	0.857
CDC45	UBE2C	9606.ENSP00000405726	9606.ENSP00000348838	0	0	0	0	0.851	0	0	0.334	0.897
CDC45	RRM2	9606.ENSP00000405726	9606.ENSP00000353770	0	0	0	0	0.898	0	0	0.355	0.932
CDC45	EXO1	9606.ENSP00000405726	9606.ENSP00000355506	0	0	0	0	0.902	0	0	0.648	0.964
CDC45	NEK2	9606.ENSP00000405726	9606.ENSP00000355966	0	0	0	0	0.624	0	0	0.343	0.742
CDC45	TTK	9606.ENSP00000405726	9606.ENSP00000358813	0	0	0	0	0.88	0	0	0.391	0.923
CDC45	CEP55	9606.ENSP00000405726	9606.ENSP00000360540	0	0	0	0	0.833	0.464	0	0.218	0.924
CDC45	ORC1	9606.ENSP00000405726	9606.ENSP00000360623	0	0	0	0	0.87	0.732	0.6	0.788	0.996
CDC45	KIF2C	9606.ENSP00000405726	9606.ENSP00000361298	0	0	0	0	0.834	0	0	0.4	0.896
CDC45	CDCA8	9606.ENSP00000405726	9606.ENSP00000362146	0	0	0	0	0.842	0	0	0.494	0.916
CDC45	KIF4A	9606.ENSP00000405726	9606.ENSP00000363524	0	0	0	0	0.772	0	0	0.336	0.842
CDC45	PTTG1	9606.ENSP00000405726	9606.ENSP00000377536	0	0	0	0	0.806	0	0	0.395	0.877
CDC45	KIF20A	9606.ENSP00000405726	9606.ENSP00000378356	0	0	0	0	0.808	0	0	0.302	0.861
CDC45	FAM83D	9606.ENSP00000405726	9606.ENSP00000481110	0	0	0	0	0.645	0	0	0.234	0.717
CDC45	HJURP	9606.ENSP00000405726	9606.ENSP00000414109	0	0	0	0	0.799	0	0	0.283	0.849
CDC45	PBK	9606.ENSP00000405726	9606.ENSP00000428489	0	0	0	0	0.857	0	0	0.234	0.886
CDC45	TOP2A	9606.ENSP00000405726	9606.ENSP00000411532	0	0	0	0	0.829	0	0	0.548	0.919
CDC6	CENPU	9606.ENSP00000209728	9606.ENSP00000281453	0	0	0	0	0.669	0	0	0.134	0.701
CDC6	KIF4A	9606.ENSP00000209728	9606.ENSP00000363524	0	0	0	0	0.65	0.057	0	0.193	0.71
CDC6	SKA1	9606.ENSP00000209728	9606.ENSP00000285116	0	0	0	0	0.677	0	0	0.156	0.716
CDC6	TK1	9606.ENSP00000209728	9606.ENSP00000301634	0	0	0	0	0.595	0	0	0.343	0.722
CDC6	SGOL1	9606.ENSP00000209728	9606.ENSP00000263753	0	0	0	0	0.651	0	0	0.246	0.725
CDC6	NEK2	9606.ENSP00000209728	9606.ENSP00000355966	0	0	0	0	0.615	0	0	0.37	0.747
CDC6	MELK	9606.ENSP00000209728	9606.ENSP00000298048	0	0	0	0	0.717	0	0	0.21	0.767
CDC6	KIF20A	9606.ENSP00000209728	9606.ENSP00000378356	0	0	0	0	0.734	0.057	0	0.17	0.774
CDC6	CEP55	9606.ENSP00000209728	9606.ENSP00000360540	0	0	0	0	0.699	0	0	0.281	0.774
CDC6	PTTG1	9606.ENSP00000209728	9606.ENSP00000377536	0	0	0	0	0.573	0	0	0.51	0.781
CDC6	CENPA	9606.ENSP00000209728	9606.ENSP00000336868	0	0	0	0	0.554	0.244	0	0.41	0.784
CDC6	WEE1	9606.ENSP00000209728	9606.ENSP00000402084	0	0	0	0	0.297	0.218	0	0.654	0.793
CDC6	MYBL2	9606.ENSP00000209728	9606.ENSP00000217026	0	0	0	0	0.615	0.102	0	0.465	0.799
CDC6	PBK	9606.ENSP00000209728	9606.ENSP00000428489	0	0	0	0	0.731	0.067	0	0.263	0.799
CDC6	KIF2C	9606.ENSP00000209728	9606.ENSP00000361298	0	0	0	0	0.705	0.057	0	0.341	0.801
CDC6	E2F8	9606.ENSP00000209728	9606.ENSP00000481103	0	0	0	0	0.375	0.104	0	0.678	0.804
CDC6	CDKN3	9606.ENSP00000209728	9606.ENSP00000335357	0	0	0	0	0.634	0.286	0	0.358	0.818
CDC6	CDK4	9606.ENSP00000209728	9606.ENSP00000257904	0	0	0	0	0.182	0.406	0	0.66	0.82
CDC6	HOXD13	9606.ENSP00000209728	9606.ENSP00000376322	0	0	0	0	0.065	0	0	0.831	0.835
CDC6	E2F7	9606.ENSP00000209728	9606.ENSP00000323246	0	0	0	0	0.542	0.104	0	0.678	0.856
CDC6	TYMS	9606.ENSP00000209728	9606.ENSP00000315644	0	0	0	0	0.757	0	0	0.485	0.869
CDC6	TOP2A	9606.ENSP00000209728	9606.ENSP00000411532	0	0	0	0	0.711	0.129	0	0.526	0.87
CDC6	CDCA8	9606.ENSP00000209728	9606.ENSP00000362146	0	0	0	0	0.808	0	0	0.359	0.872
CDC6	TTK	9606.ENSP00000209728	9606.ENSP00000358813	0	0	0	0	0.824	0	0	0.323	0.875
CDC6	DLGAP5	9606.ENSP00000209728	9606.ENSP00000247191	0	0	0	0	0.821	0	0	0.366	0.882
CDC6	KIF23	9606.ENSP00000209728	9606.ENSP00000260363	0	0	0	0	0.832	0.057	0	0.323	0.883
CDC6	NUF2	9606.ENSP00000209728	9606.ENSP00000271452	0	0	0	0	0.829	0	0	0.369	0.887
CDC6	CLSPN	9606.ENSP00000209728	9606.ENSP00000312995	0	0	0	0	0.507	0	0.6	0.495	0.891
CDC6	NDC80	9606.ENSP00000209728	9606.ENSP00000261597	0	0	0	0	0.877	0	0	0.182	0.895
CDC6	EXO1	9606.ENSP00000209728	9606.ENSP00000355506	0.073	0	0	0	0.854	0	0	0.407	0.912
CDC6	NCAPG	9606.ENSP00000209728	9606.ENSP00000251496	0	0	0	0	0.901	0	0	0.358	0.934
CDC6	RRM2	9606.ENSP00000209728	9606.ENSP00000353770	0	0	0	0	0.86	0	0	0.548	0.934
CDC6	UBE2C	9606.ENSP00000209728	9606.ENSP00000348838	0	0	0	0	0.722	0.06	0.9	0.465	0.984
CDC6	ORC1	9606.ENSP00000209728	9606.ENSP00000360623	0	0	0	0.69	0.935	0.991	0.9	0.88	0.999
CDCA2	DLGAP5	9606.ENSP00000328228	9606.ENSP00000247191	0	0	0	0	0.732	0	0	0.261	0.794
CDCA2	NCAPG	9606.ENSP00000328228	9606.ENSP00000251496	0	0	0	0	0.781	0	0	0.287	0.837
CDCA2	KIF23	9606.ENSP00000328228	9606.ENSP00000260363	0	0	0	0	0.62	0	0	0.386	0.757
CDCA2	NDC80	9606.ENSP00000328228	9606.ENSP00000261597	0	0	0	0	0.694	0	0	0.293	0.774
CDCA2	KIF18A	9606.ENSP00000328228	9606.ENSP00000263181	0	0	0	0	0.584	0	0	0.392	0.736
CDCA2	CENPE	9606.ENSP00000328228	9606.ENSP00000265148	0	0	0	0	0.583	0	0	0.512	0.788
CDCA2	NUF2	9606.ENSP00000328228	9606.ENSP00000271452	0	0	0	0	0.657	0	0	0.659	0.878
CDCA2	GSG2	9606.ENSP00000328228	9606.ENSP00000325290	0	0	0	0	0.394	0	0	0.612	0.755
CDCA2	TOP2A	9606.ENSP00000328228	9606.ENSP00000411532	0	0	0	0	0.652	0	0	0.266	0.734
CDCA2	KIF20A	9606.ENSP00000328228	9606.ENSP00000378356	0	0	0	0	0.597	0	0	0.418	0.755
CDCA2	KIF2C	9606.ENSP00000328228	9606.ENSP00000361298	0	0	0	0	0.638	0	0	0.424	0.782
CDCA2	KIF4A	9606.ENSP00000328228	9606.ENSP00000363524	0	0	0	0	0.613	0	0	0.467	0.785
CDCA2	CEP55	9606.ENSP00000328228	9606.ENSP00000360540	0	0	0	0	0.719	0	0	0.273	0.787
CDCA2	TTK	9606.ENSP00000328228	9606.ENSP00000358813	0	0	0	0	0.791	0	0	0.208	0.828
CDCA2	CDCA8	9606.ENSP00000328228	9606.ENSP00000362146	0	0	0	0	0.652	0	0	0.591	0.852
CDCA2	PBK	9606.ENSP00000328228	9606.ENSP00000428489	0	0	0	0	0.87	0	0	0.324	0.908
CDCA8	MYBL2	9606.ENSP00000362146	9606.ENSP00000217026	0	0	0	0	0.624	0	0	0.279	0.717
CDCA8	DLGAP5	9606.ENSP00000362146	9606.ENSP00000247191	0	0	0	0	0.951	0	0	0.572	0.978
CDCA8	FAM64A	9606.ENSP00000362146	9606.ENSP00000250056	0	0	0	0	0.844	0	0	0.239	0.876
CDCA8	NCAPG	9606.ENSP00000362146	9606.ENSP00000251496	0	0	0	0	0.931	0	0	0.501	0.964
CDCA8	TROAP	9606.ENSP00000362146	9606.ENSP00000257909	0	0	0	0	0.918	0	0	0.113	0.924
CDCA8	KIF23	9606.ENSP00000362146	9606.ENSP00000260363	0	0	0	0	0.879	0.27	0.9	0.563	0.995
CDCA8	NDC80	9606.ENSP00000362146	9606.ENSP00000261597	0	0	0	0	0.958	0	0	0.567	0.981
CDCA8	KIF18A	9606.ENSP00000362146	9606.ENSP00000263181	0	0	0	0	0.606	0	0	0.294	0.71
CDCA8	SGOL1	9606.ENSP00000362146	9606.ENSP00000263753	0	0	0	0	0.857	0.27	0	0.798	0.977
CDCA8	CENPE	9606.ENSP00000362146	9606.ENSP00000265148	0	0	0	0	0.959	0	0	0.631	0.984
CDCA8	NUF2	9606.ENSP00000362146	9606.ENSP00000271452	0	0	0	0	0.871	0	0	0.558	0.941
CDCA8	CENPU	9606.ENSP00000362146	9606.ENSP00000281453	0	0	0	0	0.573	0	0	0.331	0.703
CDCA8	SKA1	9606.ENSP00000362146	9606.ENSP00000285116	0	0	0	0	0.756	0	0	0.473	0.866
CDCA8	MELK	9606.ENSP00000362146	9606.ENSP00000298048	0	0	0	0	0.911	0	0	0.459	0.95
CDCA8	KIAA0101	9606.ENSP00000362146	9606.ENSP00000300035	0	0	0	0	0.918	0	0	0.225	0.934
CDCA8	TK1	9606.ENSP00000362146	9606.ENSP00000301634	0	0	0	0	0.723	0	0	0.373	0.819
CDCA8	CKAP2L	9606.ENSP00000362146	9606.ENSP00000305204	0	0	0	0	0.757	0	0	0.392	0.846
CDCA8	SHCBP1	9606.ENSP00000362146	9606.ENSP00000306473	0	0	0	0	0.856	0	0	0.554	0.933
CDCA8	TYMS	9606.ENSP00000362146	9606.ENSP00000315644	0	0	0	0	0.807	0	0	0.157	0.83
CDCA8	E2F7	9606.ENSP00000362146	9606.ENSP00000323246	0	0	0	0	0.542	0	0	0.494	0.758
CDCA8	GSG2	9606.ENSP00000362146	9606.ENSP00000325290	0	0	0	0	0.337	0	0	0.662	0.766
CDCA8	TACC3	9606.ENSP00000362146	9606.ENSP00000326550	0	0	0	0	0.912	0	0	0.309	0.936
CDCA8	ERCC6L	9606.ENSP00000362146	9606.ENSP00000334675	0	0	0	0	0.64	0	0	0.262	0.722
CDCA8	CDKN3	9606.ENSP00000362146	9606.ENSP00000335357	0	0	0	0	0.815	0	0	0.205	0.846
CDCA8	CENPA	9606.ENSP00000362146	9606.ENSP00000336868	0	0	0	0	0.794	0.148	0.9	0.637	0.992
CDCA8	UBE2C	9606.ENSP00000362146	9606.ENSP00000348838	0	0	0	0	0.961	0	0	0.414	0.976
CDCA8	RRM2	9606.ENSP00000362146	9606.ENSP00000353770	0	0	0	0	0.916	0	0	0.402	0.948
CDCA8	EXO1	9606.ENSP00000362146	9606.ENSP00000355506	0	0	0	0	0.765	0	0	0.153	0.792
CDCA8	NEK2	9606.ENSP00000362146	9606.ENSP00000355966	0	0	0	0	0.915	0	0	0.543	0.959
CDCA8	TTK	9606.ENSP00000362146	9606.ENSP00000358813	0	0	0	0	0.971	0.27	0	0.504	0.988
CDCA8	CEP55	9606.ENSP00000362146	9606.ENSP00000360540	0	0	0	0	0.912	0	0	0.551	0.958
CDCA8	KIF2C	9606.ENSP00000362146	9606.ENSP00000361298	0	0	0	0	0.933	0.128	0.9	0.667	0.997
CDCA8	HFE	9606.ENSP00000362146	9606.ENSP00000417404	0	0	0	0	0.062	0.709	0	0	0.715
CDCA8	FAM83D	9606.ENSP00000362146	9606.ENSP00000481110	0	0	0	0	0.664	0	0	0.3	0.754
CDCA8	DEPDC1	9606.ENSP00000362146	9606.ENSP00000412292	0	0	0	0	0.787	0	0	0.195	0.821
CDCA8	SPC24	9606.ENSP00000362146	9606.ENSP00000465075	0	0	0	0	0.742	0	0	0.369	0.83
CDCA8	HJURP	9606.ENSP00000362146	9606.ENSP00000414109	0	0	0	0	0.892	0	0	0.401	0.932
CDCA8	E2F8	9606.ENSP00000362146	9606.ENSP00000481103	0	0	0	0	0.892	0	0	0.496	0.943
CDCA8	KIF4A	9606.ENSP00000362146	9606.ENSP00000363524	0	0	0	0	0.889	0	0	0.531	0.946
CDCA8	PBK	9606.ENSP00000362146	9606.ENSP00000428489	0	0	0	0	0.915	0	0	0.391	0.946
CDCA8	PTTG1	9606.ENSP00000362146	9606.ENSP00000377536	0	0	0	0	0.904	0	0	0.586	0.958
CDCA8	TOP2A	9606.ENSP00000362146	9606.ENSP00000411532	0	0	0	0	0.931	0	0	0.517	0.965
CDCA8	KIF20A	9606.ENSP00000362146	9606.ENSP00000378356	0	0	0	0	0.919	0.458	0.9	0.632	0.998
CDK4	MYOD1	9606.ENSP00000257904	9606.ENSP00000250003	0	0	0	0	0	0.494	0	0.695	0.839
CDK4	E2F7	9606.ENSP00000257904	9606.ENSP00000323246	0	0	0	0	0.119	0.142	0	0.707	0.759
CDK4	E2F8	9606.ENSP00000257904	9606.ENSP00000481103	0	0	0	0	0.098	0.142	0	0.719	0.764
CDK4	CDKN3	9606.ENSP00000257904	9606.ENSP00000335357	0	0	0	0	0.107	0.157	0	0.969	0.975
CDK4	CDKN2C	9606.ENSP00000257904	9606.ENSP00000262662	0	0	0	0	0.062	0.894	0.9	0.979	0.999
CDKN3	DLGAP5	9606.ENSP00000335357	9606.ENSP00000247191	0	0	0	0	0.913	0.057	0	0.101	0.92
CDKN3	FAM64A	9606.ENSP00000335357	9606.ENSP00000250056	0	0	0	0	0.774	0	0	0.043	0.774
CDKN3	NCAPG	9606.ENSP00000335357	9606.ENSP00000251496	0	0	0	0	0.904	0.056	0	0.312	0.932
CDKN3	KIF23	9606.ENSP00000335357	9606.ENSP00000260363	0	0	0	0	0.786	0.085	0	0.113	0.811
CDKN3	NDC80	9606.ENSP00000335357	9606.ENSP00000261597	0	0	0	0	0.806	0	0	0.179	0.834
CDKN3	CENPE	9606.ENSP00000335357	9606.ENSP00000265148	0	0	0	0	0.792	0.141	0	0.095	0.824
CDKN3	NUF2	9606.ENSP00000335357	9606.ENSP00000271452	0	0	0	0	0.793	0	0	0.124	0.811
CDKN3	CENPU	9606.ENSP00000335357	9606.ENSP00000281453	0	0	0	0	0.786	0	0	0.058	0.79
CDKN3	MELK	9606.ENSP00000335357	9606.ENSP00000298048	0	0	0	0	0.899	0.143	0	0.117	0.917
CDKN3	KIAA0101	9606.ENSP00000335357	9606.ENSP00000300035	0	0	0	0	0.838	0	0	0.126	0.852
CDKN3	TYMS	9606.ENSP00000335357	9606.ENSP00000315644	0	0	0	0	0.771	0	0	0.248	0.82
CDKN3	DEPDC1	9606.ENSP00000335357	9606.ENSP00000412292	0	0	0	0	0.728	0	0	0	0.728
CDKN3	HJURP	9606.ENSP00000335357	9606.ENSP00000414109	0	0	0	0	0.787	0	0	0	0.787
CDKN3	NEK2	9606.ENSP00000335357	9606.ENSP00000355966	0	0	0	0	0.79	0	0	0.156	0.815
CDKN3	CENPA	9606.ENSP00000335357	9606.ENSP00000336868	0	0	0	0	0.807	0.078	0	0.096	0.825
CDKN3	KIF4A	9606.ENSP00000335357	9606.ENSP00000363524	0	0	0	0	0.809	0.085	0	0.094	0.827
CDKN3	KIF2C	9606.ENSP00000335357	9606.ENSP00000361298	0	0	0	0	0.826	0.085	0	0.055	0.837
CDKN3	KIF20A	9606.ENSP00000335357	9606.ENSP00000378356	0	0	0	0	0.831	0.085	0	0.092	0.847
CDKN3	UBE2C	9606.ENSP00000335357	9606.ENSP00000348838	0	0	0	0	0.845	0.056	0	0.16	0.866
CDKN3	RRM2	9606.ENSP00000335357	9606.ENSP00000353770	0	0	0	0	0.838	0	0	0.223	0.869
CDKN3	TTK	9606.ENSP00000335357	9606.ENSP00000358813	0	0	0	0	0.874	0.098	0	0.137	0.893
CDKN3	CEP55	9606.ENSP00000335357	9606.ENSP00000360540	0	0	0	0	0.892	0	0	0.107	0.9
CDKN3	TOP2A	9606.ENSP00000335357	9606.ENSP00000411532	0	0	0	0	0.875	0	0	0.316	0.911
CDKN3	PTTG1	9606.ENSP00000335357	9606.ENSP00000377536	0	0	0	0	0.907	0	0	0.177	0.92
CDKN3	PBK	9606.ENSP00000335357	9606.ENSP00000428489	0	0	0	0	0.904	0.111	0	0.152	0.922
CENPA	DLGAP5	9606.ENSP00000336868	9606.ENSP00000247191	0	0	0	0	0.805	0	0	0.46	0.89
CENPA	FAM64A	9606.ENSP00000336868	9606.ENSP00000250056	0	0	0	0	0.781	0	0	0.324	0.845
CENPA	NCAPG	9606.ENSP00000336868	9606.ENSP00000251496	0	0	0	0	0.894	0.141	0	0.391	0.94
CENPA	TROAP	9606.ENSP00000336868	9606.ENSP00000257909	0	0	0	0	0.69	0	0	0.161	0.729
CENPA	KIF23	9606.ENSP00000336868	9606.ENSP00000260363	0	0	0	0	0.734	0.324	0	0.466	0.895
CENPA	NDC80	9606.ENSP00000336868	9606.ENSP00000261597	0	0	0	0	0.788	0.125	0	0.761	0.952
CENPA	KIF18A	9606.ENSP00000336868	9606.ENSP00000263181	0	0	0	0	0.559	0.112	0	0.424	0.754
CENPA	CENPE	9606.ENSP00000336868	9606.ENSP00000265148	0	0	0	0	0.778	0.112	0	0.733	0.942
CENPA	NUF2	9606.ENSP00000336868	9606.ENSP00000271452	0	0	0	0	0.575	0.057	0	0.712	0.874
CENPA	CENPU	9606.ENSP00000336868	9606.ENSP00000281453	0	0	0	0	0.563	0.486	0.6	0.797	0.979
CENPA	SKA1	9606.ENSP00000336868	9606.ENSP00000285116	0	0	0	0	0.573	0	0	0.619	0.83
CENPA	MELK	9606.ENSP00000336868	9606.ENSP00000298048	0	0	0	0	0.821	0.058	0	0.466	0.902
CENPA	KIAA0101	9606.ENSP00000336868	9606.ENSP00000300035	0	0	0	0	0.784	0	0	0.185	0.817
CENPA	SHCBP1	9606.ENSP00000336868	9606.ENSP00000306473	0	0	0	0	0.542	0.27	0	0.263	0.732
CENPA	TYMS	9606.ENSP00000336868	9606.ENSP00000315644	0	0	0	0	0.754	0	0	0.292	0.818
CENPA	ERCC6L	9606.ENSP00000336868	9606.ENSP00000334675	0	0	0	0	0.561	0.168	0	0.464	0.787
CENPA	SPC24	9606.ENSP00000336868	9606.ENSP00000465075	0	0	0	0	0.155	0	0	0.705	0.74
CENPA	FAM83D	9606.ENSP00000336868	9606.ENSP00000481110	0	0	0	0	0.666	0	0	0.301	0.756
CENPA	DEPDC1	9606.ENSP00000336868	9606.ENSP00000412292	0	0	0	0	0.739	0	0	0.361	0.826
CENPA	EXO1	9606.ENSP00000336868	9606.ENSP00000355506	0	0	0	0	0.782	0.057	0	0.315	0.847
CENPA	PBK	9606.ENSP00000336868	9606.ENSP00000428489	0	0	0	0	0.824	0.065	0	0.292	0.873
CENPA	RRM2	9606.ENSP00000336868	9606.ENSP00000353770	0	0	0	0	0.807	0	0	0.401	0.88
CENPA	PTTG1	9606.ENSP00000336868	9606.ENSP00000377536	0	0	0	0	0.795	0	0	0.452	0.882
CENPA	KIF4A	9606.ENSP00000336868	9606.ENSP00000363524	0	0	0	0	0.78	0.112	0	0.462	0.885
CENPA	CEP55	9606.ENSP00000336868	9606.ENSP00000360540	0	0	0	0	0.819	0	0	0.393	0.885
CENPA	NEK2	9606.ENSP00000336868	9606.ENSP00000355966	0	0	0	0	0.772	0	0	0.517	0.885
CENPA	TTK	9606.ENSP00000336868	9606.ENSP00000358813	0	0	0	0	0.826	0	0	0.472	0.904
CENPA	CENPK	9606.ENSP00000336868	9606.ENSP00000379911	0	0	0	0	0.189	0.27	0.6	0.687	0.916
CENPA	KIF20A	9606.ENSP00000336868	9606.ENSP00000378356	0	0	0	0	0.833	0.112	0	0.501	0.919
CENPA	TOP2A	9606.ENSP00000336868	9606.ENSP00000411532	0	0	0	0	0.811	0.125	0	0.569	0.922
CENPA	UBE2C	9606.ENSP00000336868	9606.ENSP00000348838	0	0	0	0	0.892	0.062	0	0.455	0.939
CENPA	KIF2C	9606.ENSP00000336868	9606.ENSP00000361298	0	0	0	0	0.818	0.112	0	0.664	0.941
CENPA	HIST1H2BJ	9606.ENSP00000336868	9606.ENSP00000476136	0	0	0	0	0.153	0.841	0.6	0.098	0.945
CENPA	HIST1H3J	9606.ENSP00000336868	9606.ENSP00000352252	0	0	0	0.905	0.063	0.462	0.9	0.44	0.947
CENPA	HJURP	9606.ENSP00000336868	9606.ENSP00000414109	0	0	0	0	0.822	0.978	0.6	0.989	0.999
CENPE	DLGAP5	9606.ENSP00000265148	9606.ENSP00000247191	0	0	0	0	0.974	0.056	0	0.538	0.987
CENPE	FAM64A	9606.ENSP00000265148	9606.ENSP00000250056	0	0	0	0	0.574	0	0	0.33	0.702
CENPE	NCAPG	9606.ENSP00000265148	9606.ENSP00000251496	0	0	0	0	0.967	0.077	0	0.405	0.98
CENPE	TROAP	9606.ENSP00000265148	9606.ENSP00000257909	0	0	0	0	0.684	0	0	0.095	0.702
CENPE	KIF23	9606.ENSP00000265148	9606.ENSP00000260363	0	0	0	0.595	0.885	0	0.5	0.799	0.959
CENPE	NDC80	9606.ENSP00000265148	9606.ENSP00000261597	0	0	0	0	0.959	0.742	0	0.849	0.998
CENPE	KIF18A	9606.ENSP00000265148	9606.ENSP00000263181	0	0	0	0.643	0.773	0.103	0.8	0.896	0.969
CENPE	SGOL1	9606.ENSP00000265148	9606.ENSP00000263753	0	0	0	0	0.67	0.385	0	0.611	0.914
CENPE	SPC24	9606.ENSP00000265148	9606.ENSP00000465075	0	0	0	0	0.413	0	0	0.554	0.727
CENPE	CENPK	9606.ENSP00000265148	9606.ENSP00000379911	0	0	0	0	0.373	0.121	0	0.545	0.727
CENPE	EXO1	9606.ENSP00000265148	9606.ENSP00000355506	0	0	0	0	0.709	0	0	0.183	0.752
CENPE	ERCC6L	9606.ENSP00000265148	9606.ENSP00000334675	0	0	0	0	0.622	0.081	0	0.373	0.763
CENPE	RRM2	9606.ENSP00000265148	9606.ENSP00000353770	0	0	0	0	0.709	0	0	0.314	0.792
CENPE	SHCBP1	9606.ENSP00000265148	9606.ENSP00000306473	0	0	0	0	0.773	0.075	0	0.26	0.831
CENPE	CENPU	9606.ENSP00000265148	9606.ENSP00000281453	0	0	0	0	0.691	0.121	0	0.516	0.857
CENPE	HJURP	9606.ENSP00000265148	9606.ENSP00000414109	0	0	0	0	0.814	0	0	0.342	0.872
CENPE	PTTG1	9606.ENSP00000265148	9606.ENSP00000377536	0	0	0	0	0.701	0	0	0.622	0.882
CENPE	MELK	9606.ENSP00000265148	9606.ENSP00000298048	0	0	0	0	0.842	0.056	0	0.323	0.89
CENPE	PBK	9606.ENSP00000265148	9606.ENSP00000428489	0	0	0	0	0.85	0.104	0	0.249	0.89
CENPE	DEPDC1	9606.ENSP00000265148	9606.ENSP00000412292	0	0	0	0	0.869	0	0	0.269	0.9
CENPE	CKAP2L	9606.ENSP00000265148	9606.ENSP00000305204	0	0	0	0	0.857	0	0	0.338	0.901
CENPE	UBE2C	9606.ENSP00000265148	9606.ENSP00000348838	0	0	0	0	0.822	0.077	0	0.492	0.909
CENPE	TACC3	9606.ENSP00000265148	9606.ENSP00000326550	0	0	0	0	0.89	0.06	0	0.385	0.931
CENPE	SKA1	9606.ENSP00000265148	9606.ENSP00000285116	0	0	0	0	0.64	0.273	0	0.761	0.932
CENPE	NEK2	9606.ENSP00000265148	9606.ENSP00000355966	0	0	0	0	0.881	0.058	0	0.533	0.943
CENPE	CEP55	9606.ENSP00000265148	9606.ENSP00000360540	0	0	0	0	0.885	0.056	0	0.561	0.948
CENPE	KIF4A	9606.ENSP00000265148	9606.ENSP00000363524	0	0	0	0.631	0.917	0	0.5	0.8	0.969
CENPE	KIF20A	9606.ENSP00000265148	9606.ENSP00000378356	0	0	0	0.572	0.923	0.27	0.5	0.643	0.977
CENPE	KIF2C	9606.ENSP00000265148	9606.ENSP00000361298	0	0	0	0.616	0.87	0	0.8	0.774	0.98
CENPE	TOP2A	9606.ENSP00000265148	9606.ENSP00000411532	0	0	0	0	0.959	0	0	0.538	0.98
CENPE	NUF2	9606.ENSP00000265148	9606.ENSP00000271452	0	0	0	0	0.828	0.55	0	0.867	0.988
CENPE	TTK	9606.ENSP00000265148	9606.ENSP00000358813	0	0	0	0	0.983	0.15	0	0.583	0.993
CENPK	NCAPG	9606.ENSP00000379911	9606.ENSP00000251496	0	0	0	0	0.65	0	0	0.385	0.776
CENPK	KIF23	9606.ENSP00000379911	9606.ENSP00000260363	0	0	0	0	0.451	0.392	0	0.324	0.755
CENPK	NDC80	9606.ENSP00000379911	9606.ENSP00000261597	0	0	0	0	0.595	0	0	0.457	0.77
CENPK	KIF18A	9606.ENSP00000379911	9606.ENSP00000263181	0	0	0	0	0.49	0.121	0	0.513	0.763
CENPK	NUF2	9606.ENSP00000379911	9606.ENSP00000271452	0	0	0	0	0.646	0	0	0.508	0.818
CENPK	CENPU	9606.ENSP00000379911	9606.ENSP00000281453	0	0	0	0	0.369	0.72	0.8	0.744	0.989
CENPK	KIAA0101	9606.ENSP00000379911	9606.ENSP00000300035	0	0	0	0	0.654	0	0	0.184	0.706
CENPK	PBK	9606.ENSP00000379911	9606.ENSP00000428489	0	0	0	0	0.65	0.392	0	0.07	0.785
CENPK	HJURP	9606.ENSP00000379911	9606.ENSP00000414109	0	0	0	0	0.284	0	0.6	0.409	0.815
CENPU	DLGAP5	9606.ENSP00000281453	9606.ENSP00000247191	0	0	0	0	0.787	0	0	0.252	0.833
CENPU	NCAPG	9606.ENSP00000281453	9606.ENSP00000251496	0	0	0	0	0.837	0	0	0.37	0.893
CENPU	KIF23	9606.ENSP00000281453	9606.ENSP00000260363	0	0	0	0	0.634	0.394	0	0.29	0.829
CENPU	NDC80	9606.ENSP00000281453	9606.ENSP00000261597	0	0	0	0	0.788	0	0	0.938	0.986
CENPU	KIF18A	9606.ENSP00000281453	9606.ENSP00000263181	0	0	0	0	0.568	0.121	0	0.374	0.742
CENPU	NUF2	9606.ENSP00000281453	9606.ENSP00000271452	0	0	0	0	0.721	0	0	0.451	0.84
CENPU	EXO1	9606.ENSP00000281453	9606.ENSP00000355506	0	0	0	0	0.691	0	0	0.079	0.703
CENPU	PTTG1	9606.ENSP00000281453	9606.ENSP00000377536	0	0	0	0	0.683	0	0	0.248	0.751
CENPU	UBE2C	9606.ENSP00000281453	9606.ENSP00000348838	0	0	0	0	0.709	0	0	0.189	0.754
CENPU	TYMS	9606.ENSP00000281453	9606.ENSP00000315644	0	0	0	0	0.699	0	0	0.232	0.759
CENPU	KIF2C	9606.ENSP00000281453	9606.ENSP00000361298	0	0	0	0	0.682	0.121	0	0.338	0.799
CENPU	PBK	9606.ENSP00000281453	9606.ENSP00000428489	0	0	0	0	0.796	0	0	0.145	0.818
CENPU	KIAA0101	9606.ENSP00000281453	9606.ENSP00000300035	0	0	0	0	0.808	0	0	0.1	0.82
CENPU	TOP2A	9606.ENSP00000281453	9606.ENSP00000411532	0	0	0	0	0.757	0	0	0.317	0.827
CENPU	RRM2	9606.ENSP00000281453	9606.ENSP00000353770	0	0	0	0	0.786	0	0	0.233	0.828
CENPU	TTK	9606.ENSP00000281453	9606.ENSP00000358813	0	0	0	0	0.789	0	0	0.232	0.831
CENPU	CEP55	9606.ENSP00000281453	9606.ENSP00000360540	0	0	0	0	0.777	0	0	0.305	0.838
CENPU	KIF20A	9606.ENSP00000281453	9606.ENSP00000378356	0	0	0	0	0.68	0.245	0	0.388	0.839
CENPU	MELK	9606.ENSP00000281453	9606.ENSP00000298048	0	0	0	0	0.826	0	0	0.27	0.868
CENPU	HJURP	9606.ENSP00000281453	9606.ENSP00000414109	0	0	0	0	0.615	0	0.6	0.493	0.915
CEP55	DLGAP5	9606.ENSP00000360540	9606.ENSP00000247191	0	0	0	0	0.937	0	0	0.574	0.972
CEP55	FAM64A	9606.ENSP00000360540	9606.ENSP00000250056	0	0	0	0	0.784	0	0	0.284	0.839
CEP55	NCAPG	9606.ENSP00000360540	9606.ENSP00000251496	0	0	0	0	0.923	0	0	0.376	0.95
CEP55	TROAP	9606.ENSP00000360540	9606.ENSP00000257909	0	0	0	0	0.698	0	0	0.191	0.746
CEP55	KIF23	9606.ENSP00000360540	9606.ENSP00000260363	0	0	0	0	0.848	0.436	0	0.962	0.996
CEP55	NDC80	9606.ENSP00000360540	9606.ENSP00000261597	0	0	0	0	0.91	0	0	0.399	0.944
CEP55	KIF18A	9606.ENSP00000360540	9606.ENSP00000263181	0	0	0	0	0.655	0.056	0	0.254	0.736
CEP55	SGOL1	9606.ENSP00000360540	9606.ENSP00000263753	0	0	0	0	0.666	0	0	0.298	0.755
CEP55	NUF2	9606.ENSP00000360540	9606.ENSP00000271452	0	0	0	0	0.83	0	0	0.601	0.929
CEP55	MELK	9606.ENSP00000360540	9606.ENSP00000298048	0	0	0	0	0.908	0	0	0.498	0.952
CEP55	KIAA0101	9606.ENSP00000360540	9606.ENSP00000300035	0	0	0	0	0.852	0	0	0.416	0.91
CEP55	CKAP2L	9606.ENSP00000360540	9606.ENSP00000305204	0	0	0	0	0.637	0	0	0.283	0.728
CEP55	SHCBP1	9606.ENSP00000360540	9606.ENSP00000306473	0	0	0	0	0.804	0	0	0.23	0.843
CEP55	TYMS	9606.ENSP00000360540	9606.ENSP00000315644	0	0	0	0	0.785	0	0	0.377	0.86
CEP55	TACC3	9606.ENSP00000360540	9606.ENSP00000326550	0	0	0	0	0.642	0.128	0	0.161	0.715
CEP55	ERCC6L	9606.ENSP00000360540	9606.ENSP00000334675	0	0	0	0	0.601	0	0	0.301	0.709
CEP55	UBE2C	9606.ENSP00000360540	9606.ENSP00000348838	0	0	0	0	0.911	0	0	0.564	0.959
CEP55	RRM2	9606.ENSP00000360540	9606.ENSP00000353770	0	0	0	0	0.919	0	0	0.562	0.963
CEP55	EXO1	9606.ENSP00000360540	9606.ENSP00000355506	0	0	0	0	0.803	0	0	0.177	0.831
CEP55	NEK2	9606.ENSP00000360540	9606.ENSP00000355966	0	0	0	0	0.871	0	0	0.483	0.93
CEP55	TTK	9606.ENSP00000360540	9606.ENSP00000358813	0	0	0	0	0.943	0	0	0.519	0.971
CEP55	E2F8	9606.ENSP00000360540	9606.ENSP00000481103	0	0	0	0	0.671	0	0	0.124	0.7
CEP55	FAM83D	9606.ENSP00000360540	9606.ENSP00000481110	0	0	0	0	0.564	0	0	0.373	0.715
CEP55	HJURP	9606.ENSP00000360540	9606.ENSP00000414109	0	0	0	0	0.839	0	0	0.324	0.887
CEP55	DEPDC1	9606.ENSP00000360540	9606.ENSP00000412292	0	0	0	0	0.86	0	0	0.414	0.914
CEP55	PTTG1	9606.ENSP00000360540	9606.ENSP00000377536	0	0	0	0	0.831	0	0	0.519	0.915
CEP55	KIF4A	9606.ENSP00000360540	9606.ENSP00000363524	0	0	0	0	0.825	0.056	0	0.54	0.917
CEP55	KIF2C	9606.ENSP00000360540	9606.ENSP00000361298	0	0	0	0	0.907	0.056	0	0.504	0.952
CEP55	PBK	9606.ENSP00000360540	9606.ENSP00000428489	0	0	0	0	0.924	0	0	0.56	0.965
CEP55	KIF20A	9606.ENSP00000360540	9606.ENSP00000378356	0	0	0	0	0.914	0.059	0	0.617	0.966
CEP55	TOP2A	9606.ENSP00000360540	9606.ENSP00000411532	0	0	0	0	0.937	0	0	0.529	0.969
CFAP45	RIBC2	9606.ENSP00000357079	9606.ENSP00000483356	0	0	0	0	0.24	0.384	0	0.661	0.827
CFH	PTX3	9606.ENSP00000356399	9606.ENSP00000295927	0	0	0	0	0.065	0.877	0	0.963	0.995
CFH	SPP1	9606.ENSP00000356399	9606.ENSP00000378517	0	0	0	0	0	0	0	0.708	0.708
CFH	CFI	9606.ENSP00000356399	9606.ENSP00000378130	0	0	0	0	0.12	0.87	0.6	0.93	0.996
CHAF1B	NCAPG	9606.ENSP00000315700	9606.ENSP00000251496	0	0	0	0	0.693	0	0	0.147	0.727
CHAF1B	TYMS	9606.ENSP00000315700	9606.ENSP00000315644	0	0	0	0	0.664	0	0	0.218	0.726
CHAF1B	HIST1H3J	9606.ENSP00000315700	9606.ENSP00000352252	0	0	0	0	0.062	0.929	0	0.352	0.953
CHI3L1	IL13RA2	9606.ENSP00000255409	9606.ENSP00000361004	0	0	0	0	0	0.746	0	0.8	0.947
CHI3L1	SDC1	9606.ENSP00000255409	9606.ENSP00000370542	0	0	0	0	0	0	0	0.961	0.961
CHRNA1	LAMB1	9606.ENSP00000261007	9606.ENSP00000222399	0	0	0	0	0.062	0	0.9	0.063	0.904
CISH	IL2RB	9606.ENSP00000409346	9606.ENSP00000216223	0	0	0	0	0.077	0.27	0.9	0.212	0.939
CISH	IL7R	9606.ENSP00000409346	9606.ENSP00000306157	0	0	0	0	0	0.486	0	0.48	0.721
CISH	SOCS1	9606.ENSP00000409346	9606.ENSP00000329418	0	0	0	0.709	0.082	0	0.9	0.895	0.929
CISH	LCK	9606.ENSP00000409346	9606.ENSP00000337825	0	0	0	0	0	0.317	0.9	0.292	0.947
CISH	IL2RA	9606.ENSP00000409346	9606.ENSP00000369293	0	0	0	0	0.061	0	0.9	0.335	0.932
CKAP2L	NCAPG	9606.ENSP00000305204	9606.ENSP00000251496	0	0	0	0	0.732	0	0	0.382	0.827
CKAP2L	KIF23	9606.ENSP00000305204	9606.ENSP00000260363	0	0	0	0	0.623	0	0	0.329	0.736
CKAP2L	NDC80	9606.ENSP00000305204	9606.ENSP00000261597	0	0	0	0	0.859	0	0	0.062	0.862
CKAP2L	SGOL1	9606.ENSP00000305204	9606.ENSP00000263753	0	0	0	0	0.816	0	0	0	0.816
CKAP2L	NUF2	9606.ENSP00000305204	9606.ENSP00000271452	0	0	0	0	0.694	0	0	0.231	0.755
CKAP2L	SKA1	9606.ENSP00000305204	9606.ENSP00000285116	0	0	0	0	0.698	0	0	0.21	0.751
CKAP2L	MELK	9606.ENSP00000305204	9606.ENSP00000298048	0	0	0	0	0.726	0	0	0.36	0.817
CKAP2L	SHCBP1	9606.ENSP00000305204	9606.ENSP00000306473	0	0	0	0	0.59	0	0	0.298	0.7
CKAP2L	NEK2	9606.ENSP00000305204	9606.ENSP00000355966	0	0	0	0	0.661	0	0	0.162	0.703
CKAP2L	UBE2C	9606.ENSP00000305204	9606.ENSP00000348838	0	0	0	0	0.642	0	0	0.248	0.719
CKAP2L	TTK	9606.ENSP00000305204	9606.ENSP00000358813	0	0	0	0	0.658	0	0	0.284	0.745
CKAP2L	TOP2A	9606.ENSP00000305204	9606.ENSP00000411532	0	0	0	0	0.737	0	0	0.198	0.78
CKAP2L	KIF2C	9606.ENSP00000305204	9606.ENSP00000361298	0	0	0	0	0.754	0	0	0.196	0.794
CKAP2L	KIF20A	9606.ENSP00000305204	9606.ENSP00000378356	0	0	0	0	0.818	0	0	0.322	0.871
CLEC5A	TREM1	9606.ENSP00000449999	9606.ENSP00000244709	0	0	0	0	0.347	0	0	0.568	0.706
CLSPN	NDC80	9606.ENSP00000312995	9606.ENSP00000261597	0	0	0	0	0.7	0	0	0.083	0.713
CLSPN	WEE1	9606.ENSP00000312995	9606.ENSP00000402084	0	0	0	0	0.131	0	0	0.707	0.735
CLSPN	TOP2A	9606.ENSP00000312995	9606.ENSP00000411532	0	0	0	0	0.759	0	0	0.449	0.862
CLSPN	ORC1	9606.ENSP00000312995	9606.ENSP00000360623	0	0	0	0	0.631	0	0.6	0.168	0.866
CLSPN	EXO1	9606.ENSP00000312995	9606.ENSP00000355506	0	0	0	0	0.675	0	0.6	0.552	0.936
COL12A1	COL1A1	9606.ENSP00000325146	9606.ENSP00000225964	0	0	0	0.557	0.462	0.169	0.3	0.673	0.759
COL12A1	COL6A2	9606.ENSP00000325146	9606.ENSP00000300527	0	0	0	0.591	0.287	0.349	0.3	0.681	0.743
COL12A1	COL3A1	9606.ENSP00000325146	9606.ENSP00000304408	0	0	0	0.557	0.509	0.169	0.3	0.668	0.779
COL12A1	POSTN	9606.ENSP00000325146	9606.ENSP00000369071	0	0	0	0	0.533	0.103	0	0.433	0.742
COL12A1	COL5A1	9606.ENSP00000325146	9606.ENSP00000360882	0	0	0	0.553	0.349	0.243	0.3	0.733	0.746
COL12A1	SERPINH1	9606.ENSP00000325146	9606.ENSP00000434412	0	0	0	0	0.23	0.059	0.6	0.338	0.782
COL12A1	COL5A2	9606.ENSP00000325146	9606.ENSP00000364000	0	0	0	0.553	0.563	0.169	0.3	0.693	0.807
COL12A1	MMP12	9606.ENSP00000325146	9606.ENSP00000458585	0	0	0	0	0.065	0.059	0.9	0.277	0.927
COL15A1	MMP7	9606.ENSP00000364140	9606.ENSP00000260227	0	0	0	0	0.063	0	0.9	0.138	0.912
COL15A1	MMP13	9606.ENSP00000364140	9606.ENSP00000260302	0	0	0	0	0.062	0	0.9	0.164	0.914
COL15A1	COL8A1	9606.ENSP00000364140	9606.ENSP00000261037	0	0	0	0.658	0.076	0	0.72	0.578	0.781
COL15A1	COL4A2	9606.ENSP00000364140	9606.ENSP00000353654	0	0	0	0.558	0.17	0	0.54	0.614	0.707
COL15A1	MMP9	9606.ENSP00000364140	9606.ENSP00000361405	0	0	0	0	0.063	0	0.9	0.181	0.916
COL15A1	COL4A1	9606.ENSP00000364140	9606.ENSP00000364979	0	0	0	0.567	0.161	0	0.54	0.654	0.709
COL1A1	TIMP1	9606.ENSP00000225964	9606.ENSP00000218388	0	0	0	0	0.145	0	0	0.716	0.747
COL1A1	PCOLCE	9606.ENSP00000225964	9606.ENSP00000223061	0	0	0	0	0.544	0.173	0.9	0.415	0.975
COL1A1	IBSP	9606.ENSP00000225964	9606.ENSP00000226284	0	0	0	0	0.053	0	0	0.697	0.7
COL1A1	FMOD	9606.ENSP00000225964	9606.ENSP00000347041	0	0	0	0	0.373	0.076	0	0.53	0.703
COL1A1	SPP1	9606.ENSP00000225964	9606.ENSP00000378517	0	0	0	0	0.063	0	0	0.714	0.72
COL1A1	MMP9	9606.ENSP00000225964	9606.ENSP00000361405	0	0	0	0	0.077	0.227	0	0.639	0.72
COL1A1	COL2A1	9606.ENSP00000225964	9606.ENSP00000369889	0	0	0.445	0.971	0.085	0.043	0.72	0.858	0.743
COL1A1	COL4A2	9606.ENSP00000225964	9606.ENSP00000353654	0	0	0.378	0.698	0.509	0.155	0.3	0.664	0.773
COL1A1	LOX	9606.ENSP00000225964	9606.ENSP00000231004	0	0	0	0	0.409	0.192	0	0.632	0.809
COL1A1	COL4A1	9606.ENSP00000225964	9606.ENSP00000364979	0	0	0.407	0.706	0.576	0.155	0.3	0.753	0.81
COL1A1	ITGA5	9606.ENSP00000225964	9606.ENSP00000293379	0	0	0	0	0.121	0.213	0.6	0.49	0.84
COL1A1	COL6A3	9606.ENSP00000225964	9606.ENSP00000295550	0	0	0	0.574	0.768	0	0.3	0.702	0.88
COL1A1	POSTN	9606.ENSP00000225964	9606.ENSP00000369071	0	0	0	0	0.658	0.103	0	0.662	0.887
COL1A1	SDC1	9606.ENSP00000225964	9606.ENSP00000370542	0	0	0	0	0.141	0	0.9	0.181	0.923
COL1A1	SERPINH1	9606.ENSP00000225964	9606.ENSP00000434412	0	0	0	0	0.4	0.183	0.6	0.665	0.925
COL1A1	COL6A2	9606.ENSP00000225964	9606.ENSP00000300527	0	0	0	0.602	0.882	0.178	0.3	0.742	0.948
COL1A1	FN1	9606.ENSP00000225964	9606.ENSP00000346839	0	0	0	0	0.356	0.701	0	0.757	0.949
COL1A1	ITGB3	9606.ENSP00000225964	9606.ENSP00000452786	0	0	0	0	0.085	0.103	0.9	0.47	0.95
COL1A1	COL5A1	9606.ENSP00000225964	9606.ENSP00000360882	0	0	0.42	0.85	0.779	0.192	0.72	0.82	0.955
COL1A1	LUM	9606.ENSP00000225964	9606.ENSP00000266718	0	0	0	0	0.764	0.379	0.72	0.58	0.98
COL1A1	COL5A2	9606.ENSP00000225964	9606.ENSP00000364000	0	0	0.444	0.949	0.94	0	0.72	0.796	0.983
COL1A1	COL3A1	9606.ENSP00000225964	9606.ENSP00000304408	0	0	0.439	0.951	0.944	0	0.8	0.892	0.989
COL1A1	COL1A2	9606.ENSP00000225964	9606.ENSP00000297268	0	0	0.443	0.958	0.99	0.559	0.9	0.954	0.999
COL1A2	PCOLCE	9606.ENSP00000297268	9606.ENSP00000223061	0	0	0	0	0.557	0.151	0.9	0.626	0.984
COL1A2	LOX	9606.ENSP00000297268	9606.ENSP00000231004	0	0	0	0	0.378	0.192	0	0.53	0.743
COL1A2	F13A1	9606.ENSP00000297268	9606.ENSP00000264870	0	0	0	0	0	0	0.9	0.143	0.91
COL1A2	LUM	9606.ENSP00000297268	9606.ENSP00000266718	0	0	0	0	0.875	0.472	0.9	0.559	0.996
COL1A2	ITGA5	9606.ENSP00000297268	9606.ENSP00000293379	0	0	0	0	0.098	0	0.6	0.373	0.754
COL1A2	COL6A3	9606.ENSP00000297268	9606.ENSP00000295550	0	0	0	0.563	0.838	0	0.3	0.699	0.917
COL1A2	TGFBI	9606.ENSP00000297268	9606.ENSP00000416330	0	0	0	0	0.256	0.391	0	0.418	0.713
COL1A2	COL4A2	9606.ENSP00000297268	9606.ENSP00000353654	0	0	0.411	0.706	0.354	0.4	0.3	0.662	0.788
COL1A2	COL2A1	9606.ENSP00000297268	9606.ENSP00000369889	0	0	0.446	0.958	0.123	0.213	0.72	0.736	0.799
COL1A2	COL6A2	9606.ENSP00000297268	9606.ENSP00000300527	0	0	0	0.581	0.62	0	0.3	0.691	0.801
COL1A2	COL4A1	9606.ENSP00000297268	9606.ENSP00000364979	0	0	0.419	0.708	0.565	0.246	0.3	0.708	0.824
COL1A2	SERPINH1	9606.ENSP00000297268	9606.ENSP00000434412	0	0	0	0	0.271	0.059	0.6	0.668	0.896
COL1A2	SDC1	9606.ENSP00000297268	9606.ENSP00000370542	0	0	0	0	0.079	0	0.9	0.17	0.916
COL1A2	POSTN	9606.ENSP00000297268	9606.ENSP00000369071	0	0	0	0	0.738	0.392	0	0.585	0.928
COL1A2	ITGB3	9606.ENSP00000297268	9606.ENSP00000452786	0	0	0	0	0.085	0.229	0.9	0.298	0.943
COL1A2	COL5A1	9606.ENSP00000297268	9606.ENSP00000360882	0	0	0.426	0.84	0.723	0.466	0.72	0.785	0.963
COL1A2	FN1	9606.ENSP00000297268	9606.ENSP00000346839	0	0	0	0	0.518	0.225	0.9	0.689	0.986
COL1A2	COL3A1	9606.ENSP00000297268	9606.ENSP00000304408	0	0	0.44	0.93	0.948	0.213	0.8	0.873	0.991
COL1A2	COL5A2	9606.ENSP00000297268	9606.ENSP00000364000	0	0	0.446	0.936	0.964	0.4	0.72	0.81	0.993
COL2A1	PCOLCE	9606.ENSP00000369889	9606.ENSP00000223061	0	0	0	0	0.079	0.321	0.9	0.101	0.936
COL2A1	MMP13	9606.ENSP00000369889	9606.ENSP00000260302	0	0	0	0	0	0.227	0	0.833	0.865
COL2A1	LUM	9606.ENSP00000369889	9606.ENSP00000266718	0	0	0	0	0.067	0.189	0.72	0.415	0.859
COL2A1	ITGA5	9606.ENSP00000369889	9606.ENSP00000293379	0	0	0	0	0.064	0	0.6	0.29	0.711
COL2A1	COL3A1	9606.ENSP00000369889	9606.ENSP00000304408	0	0	0.429	0.952	0.088	0	0.72	0.659	0.746
COL2A1	COL5A1	9606.ENSP00000369889	9606.ENSP00000360882	0	0	0.421	0.864	0.138	0.266	0.72	0.571	0.831
COL2A1	COL5A2	9606.ENSP00000369889	9606.ENSP00000364000	0	0	0.442	0.962	0.064	0	0.72	0.547	0.736
COL2A1	SERPINH1	9606.ENSP00000369889	9606.ENSP00000434412	0	0	0	0	0.098	0.182	0.6	0.343	0.78
COL2A1	HLA-DRA	9606.ENSP00000369889	9606.ENSP00000378786	0	0	0	0	0	0.8	0	0	0.8
COL2A1	SDC1	9606.ENSP00000369889	9606.ENSP00000370542	0	0	0	0	0	0	0.9	0.052	0.901
COL2A1	ITGB3	9606.ENSP00000369889	9606.ENSP00000452786	0	0	0	0	0.062	0.103	0.9	0.213	0.924
COL3A1	PCOLCE	9606.ENSP00000304408	9606.ENSP00000223061	0	0	0	0	0.487	0.857	0.9	0.418	0.995
COL3A1	LOX	9606.ENSP00000304408	9606.ENSP00000231004	0	0	0	0	0.278	0.192	0	0.571	0.728
COL3A1	LUM	9606.ENSP00000304408	9606.ENSP00000266718	0	0	0	0	0.831	0.189	0.72	0.607	0.982
COL3A1	COL6A3	9606.ENSP00000304408	9606.ENSP00000295550	0	0	0	0.571	0.802	0	0.3	0.735	0.9
COL3A1	COL6A2	9606.ENSP00000304408	9606.ENSP00000300527	0	0	0	0.597	0.6	0.178	0.3	0.681	0.817
COL3A1	COL4A2	9606.ENSP00000304408	9606.ENSP00000353654	0	0	0.364	0.703	0.53	0.155	0.3	0.667	0.78
COL3A1	FN1	9606.ENSP00000304408	9606.ENSP00000346839	0	0	0	0	0.343	0.056	0	0.686	0.789
COL3A1	FMOD	9606.ENSP00000304408	9606.ENSP00000347041	0	0	0	0	0.594	0.076	0	0.503	0.797
COL3A1	COL4A1	9606.ENSP00000304408	9606.ENSP00000364979	0	0	0.413	0.717	0.569	0.155	0.3	0.757	0.805
COL3A1	SERPINH1	9606.ENSP00000304408	9606.ENSP00000434412	0	0	0	0	0.305	0.182	0.6	0.469	0.863
COL3A1	COL5A1	9606.ENSP00000304408	9606.ENSP00000360882	0	0	0.401	0.841	0.643	0	0.72	0.818	0.914
COL3A1	SDC1	9606.ENSP00000304408	9606.ENSP00000370542	0	0	0	0	0.093	0	0.9	0.156	0.916
COL3A1	POSTN	9606.ENSP00000304408	9606.ENSP00000369071	0	0	0	0	0.798	0.103	0	0.609	0.923
COL3A1	ITGB3	9606.ENSP00000304408	9606.ENSP00000452786	0	0	0	0	0.09	0.103	0.9	0.391	0.943
COL3A1	COL5A2	9606.ENSP00000304408	9606.ENSP00000364000	0	0	0.444	0.931	0.939	0	0.72	0.822	0.983
COL4A1	LAMB1	9606.ENSP00000364979	9606.ENSP00000222399	0	0	0	0	0.347	0.072	0	0.629	0.755
COL4A1	IBSP	9606.ENSP00000364979	9606.ENSP00000226284	0	0	0	0	0	0	0.9	0.102	0.906
COL4A1	THBS1	9606.ENSP00000364979	9606.ENSP00000260356	0	0	0	0	0.115	0.281	0.5	0.517	0.826
COL4A1	ITGA5	9606.ENSP00000364979	9606.ENSP00000293379	0	0	0	0	0.152	0	0.6	0.455	0.799
COL4A1	FN1	9606.ENSP00000364979	9606.ENSP00000346839	0	0	0	0	0.347	0.225	0	0.603	0.781
COL4A1	COL4A2	9606.ENSP00000364979	9606.ENSP00000353654	0	0	0.433	0.886	0.963	0.934	0.9	0.96	0.999
COL4A1	COL5A1	9606.ENSP00000364979	9606.ENSP00000360882	0	0	0.4	0.684	0.618	0.155	0.3	0.697	0.83
COL4A1	COL5A2	9606.ENSP00000364979	9606.ENSP00000364000	0	0	0.43	0.699	0.578	0.155	0.3	0.684	0.81
COL4A1	SERPINH1	9606.ENSP00000364979	9606.ENSP00000434412	0	0	0	0	0.383	0.252	0.6	0.47	0.889
COL4A1	SDC1	9606.ENSP00000364979	9606.ENSP00000370542	0	0	0	0	0.09	0	0.9	0.15	0.915
COL4A1	ITGB3	9606.ENSP00000364979	9606.ENSP00000452786	0	0	0	0	0.091	0.123	0.9	0.409	0.946
COL4A2	LAMB1	9606.ENSP00000353654	9606.ENSP00000222399	0	0	0	0	0.347	0.072	0	0.58	0.723
COL4A2	IBSP	9606.ENSP00000353654	9606.ENSP00000226284	0	0	0	0	0	0	0.9	0.143	0.91
COL4A2	THBS1	9606.ENSP00000353654	9606.ENSP00000260356	0	0	0	0	0.12	0.056	0.5	0.424	0.728
COL4A2	MSR1	9606.ENSP00000353654	9606.ENSP00000262101	0	0	0	0.576	0	0.615	0.6	0	0.839
COL4A2	ITGA5	9606.ENSP00000353654	9606.ENSP00000293379	0	0	0	0	0.152	0	0.6	0.367	0.766
COL4A2	FN1	9606.ENSP00000353654	9606.ENSP00000346839	0	0	0	0	0.346	0.225	0	0.523	0.737
COL4A2	COL5A2	9606.ENSP00000353654	9606.ENSP00000364000	0	0	0.397	0.692	0.405	0.339	0.3	0.609	0.783
COL4A2	COL5A1	9606.ENSP00000353654	9606.ENSP00000360882	0	0	0.351	0.647	0.373	0.402	0.3	0.676	0.806
COL4A2	SERPINH1	9606.ENSP00000353654	9606.ENSP00000434412	0	0	0	0	0.337	0.547	0.6	0.4	0.918
COL4A2	SDC1	9606.ENSP00000353654	9606.ENSP00000370542	0	0	0	0	0.126	0	0.9	0.15	0.919
COL4A2	ITGB3	9606.ENSP00000353654	9606.ENSP00000452786	0	0	0	0	0.097	0.123	0.9	0.409	0.947
COL5A1	PCOLCE	9606.ENSP00000360882	9606.ENSP00000223061	0	0	0	0	0.374	0.497	0.9	0.48	0.981
COL5A1	THBS1	9606.ENSP00000360882	9606.ENSP00000260356	0	0	0	0	0.132	0.47	0	0.424	0.712
COL5A1	LUM	9606.ENSP00000360882	9606.ENSP00000266718	0	0	0	0	0.381	0.189	0.72	0.522	0.923
COL5A1	COL6A3	9606.ENSP00000360882	9606.ENSP00000295550	0	0	0	0.561	0.488	0.192	0.3	0.675	0.776
COL5A1	COL6A2	9606.ENSP00000360882	9606.ENSP00000300527	0	0	0	0.624	0.832	0.367	0.3	0.701	0.94
COL5A1	FN1	9606.ENSP00000360882	9606.ENSP00000346839	0	0	0	0	0.373	0.281	0	0.518	0.764
COL5A1	SERPINH1	9606.ENSP00000360882	9606.ENSP00000434412	0	0	0	0	0.298	0.305	0.6	0.467	0.882
COL5A1	SDC1	9606.ENSP00000360882	9606.ENSP00000370542	0	0	0	0	0.098	0	0.9	0.15	0.916
COL5A1	ITGB3	9606.ENSP00000360882	9606.ENSP00000452786	0	0	0	0	0.107	0.103	0.9	0.367	0.942
COL5A1	COL5A2	9606.ENSP00000360882	9606.ENSP00000364000	0	0	0.421	0.838	0.663	0.305	0.9	0.868	0.979
COL5A2	PCOLCE	9606.ENSP00000364000	9606.ENSP00000223061	0	0	0	0	0.242	0.173	0.9	0.425	0.959
COL5A2	LUM	9606.ENSP00000364000	9606.ENSP00000266718	0	0	0	0	0.61	0.189	0.72	0.42	0.941
COL5A2	COL6A3	9606.ENSP00000364000	9606.ENSP00000295550	0	0	0	0.561	0.597	0	0.3	0.749	0.801
COL5A2	COL6A2	9606.ENSP00000364000	9606.ENSP00000300527	0	0	0	0.592	0.366	0.178	0.3	0.675	0.71
COL5A2	SERPINH1	9606.ENSP00000364000	9606.ENSP00000434412	0	0	0	0	0.299	0.344	0.6	0.42	0.879
COL5A2	POSTN	9606.ENSP00000364000	9606.ENSP00000369071	0	0	0	0	0.767	0.103	0	0.47	0.879
COL5A2	SDC1	9606.ENSP00000364000	9606.ENSP00000370542	0	0	0	0	0.076	0	0.9	0.082	0.907
COL5A2	ITGB3	9606.ENSP00000364000	9606.ENSP00000452786	0	0	0	0	0.085	0.103	0.9	0.329	0.937
COL6A2	PCOLCE	9606.ENSP00000300527	9606.ENSP00000223061	0	0	0	0	0.564	0.151	0	0.47	0.787
COL6A2	THBS1	9606.ENSP00000300527	9606.ENSP00000260356	0	0	0	0	0.108	0.056	0.5	0.408	0.717
COL6A2	ITGA5	9606.ENSP00000300527	9606.ENSP00000293379	0	0	0	0	0.183	0	0.6	0.407	0.789
COL6A2	COL6A3	9606.ENSP00000300527	9606.ENSP00000295550	0	0	0	0.657	0.861	0	0.9	0.947	0.99
COL6A2	SERPINH1	9606.ENSP00000300527	9606.ENSP00000434412	0	0	0	0	0.256	0.059	0.6	0.45	0.825
COL6A2	SDC1	9606.ENSP00000300527	9606.ENSP00000370542	0	0	0	0	0.076	0	0.9	0.122	0.911
COL6A2	ITGB3	9606.ENSP00000300527	9606.ENSP00000452786	0	0	0	0	0.13	0.061	0.9	0.178	0.923
COL6A3	THBS1	9606.ENSP00000295550	9606.ENSP00000260356	0	0	0	0	0.174	0.056	0.5	0.332	0.705
COL6A3	LUM	9606.ENSP00000295550	9606.ENSP00000266718	0	0	0	0	0.585	0.076	0	0.558	0.816
COL6A3	ITGA5	9606.ENSP00000295550	9606.ENSP00000293379	0	0	0	0	0.096	0	0.6	0.326	0.735
COL6A3	SERPINH1	9606.ENSP00000295550	9606.ENSP00000434412	0	0	0	0	0.161	0.059	0.6	0.298	0.748
COL6A3	POSTN	9606.ENSP00000295550	9606.ENSP00000369071	0	0	0	0	0.588	0.103	0	0.459	0.782
COL6A3	SDC1	9606.ENSP00000295550	9606.ENSP00000370542	0	0	0	0	0.062	0	0.9	0.091	0.907
COL6A3	ITGB3	9606.ENSP00000295550	9606.ENSP00000452786	0	0	0	0	0.096	0.061	0.9	0.135	0.916
COL8A1	SERPINH1	9606.ENSP00000261037	9606.ENSP00000434412	0	0	0	0	0.087	0	0.6	0.375	0.752
CP	TTR	9606.ENSP00000264613	9606.ENSP00000237014	0	0	0	0	0.116	0	0	0.687	0.711
CP	SERPINA1	9606.ENSP00000264613	9606.ENSP00000416066	0	0	0	0	0.118	0	0	0.845	0.857
CP	HP	9606.ENSP00000264613	9606.ENSP00000348170	0	0	0	0	0.093	0	0	0.893	0.899
CRABP1	STRA6	9606.ENSP00000299529	9606.ENSP00000456609	0	0	0	0	0.062	0	0	0.72	0.726
CSF3	IL7R	9606.ENSP00000225474	9606.ENSP00000306157	0	0	0	0	0	0	0.6	0.408	0.753
CSF3	IL2RA	9606.ENSP00000225474	9606.ENSP00000369293	0	0	0	0	0	0	0.6	0.468	0.778
CSF3	OSMR	9606.ENSP00000225474	9606.ENSP00000274276	0	0	0	0	0	0	0.6	0.506	0.794
CSF3	IL9	9606.ENSP00000225474	9606.ENSP00000274520	0	0	0	0	0	0	0	0.815	0.815
CSF3	VEGFA	9606.ENSP00000225474	9606.ENSP00000478570	0	0	0	0	0	0	0	0.855	0.855
CSF3	LIF	9606.ENSP00000225474	9606.ENSP00000249075	0	0	0	0	0.076	0	0.9	0.658	0.965
CSF3	CXCL10	9606.ENSP00000225474	9606.ENSP00000305651	0	0	0	0	0.098	0	0.9	0.805	0.98
CSF3	CXCL8	9606.ENSP00000225474	9606.ENSP00000306512	0	0	0	0	0.172	0	0.9	0.861	0.987
CSF3	IL6	9606.ENSP00000225474	9606.ENSP00000385675	0	0	0	0	0.298	0	0.9	0.872	0.99
CSTA	PI3	9606.ENSP00000264474	9606.ENSP00000243924	0	0	0	0	0.128	0.27	0.9	0.431	0.959
CSTA	S100A9	9606.ENSP00000264474	9606.ENSP00000357727	0	0	0	0	0.538	0	0	0.381	0.702
CTHRC1	ROR2	9606.ENSP00000330523	9606.ENSP00000364860	0	0	0	0	0.062	0	0.9	0.235	0.922
CXCL10	LIF	9606.ENSP00000305651	9606.ENSP00000249075	0	0	0	0	0.062	0	0.9	0.417	0.94
CXCL10	OASL	9606.ENSP00000305651	9606.ENSP00000257570	0	0	0	0	0.639	0	0	0.522	0.82
CXCL10	IL9	9606.ENSP00000305651	9606.ENSP00000274520	0	0	0	0	0	0	0	0.731	0.731
CXCL10	CXCL13	9606.ENSP00000305651	9606.ENSP00000286758	0	0	0	0	0.153	0	0.9	0.712	0.973
CXCL10	OAS1	9606.ENSP00000305651	9606.ENSP00000388001	0	0	0	0	0.328	0	0	0.602	0.721
CXCL10	IDO1	9606.ENSP00000305651	9606.ENSP00000430950	0	0	0	0	0.411	0	0	0.56	0.73
CXCL10	VEGFA	9606.ENSP00000305651	9606.ENSP00000478570	0	0	0	0	0	0	0	0.739	0.739
CXCL10	GBP5	9606.ENSP00000305651	9606.ENSP00000359488	0	0	0	0	0.67	0	0	0.455	0.812
CXCL10	MX1	9606.ENSP00000305651	9606.ENSP00000381601	0	0	0	0	0.416	0	0	0.703	0.819
CXCL10	DPP4	9606.ENSP00000305651	9606.ENSP00000353731	0	0	0	0	0	0.679	0	0.528	0.842
CXCL10	GBP1	9606.ENSP00000305651	9606.ENSP00000359504	0	0	0	0	0.795	0	0	0.55	0.903
CXCL10	CXCL8	9606.ENSP00000305651	9606.ENSP00000306512	0	0	0	0	0.145	0	0.6	0.879	0.955
CXCL10	CXCL11	9606.ENSP00000305651	9606.ENSP00000306884	0	0	0	0.818	0.841	0.237	0.9	0.882	0.988
CXCL10	CXCL9	9606.ENSP00000305651	9606.ENSP00000354901	0	0	0	0.862	0.848	0.272	0.9	0.918	0.989
CXCL10	IL6	9606.ENSP00000305651	9606.ENSP00000385675	0	0	0	0	0.175	0	0.9	0.878	0.989
CXCL11	CXCL6	9606.ENSP00000306884	9606.ENSP00000226317	0	0	0	0	0.086	0	0	0.774	0.784
CXCL11	TNFAIP6	9606.ENSP00000306884	9606.ENSP00000243347	0	0	0	0	0.09	0.68	0	0.24	0.759
CXCL11	CXCL13	9606.ENSP00000306884	9606.ENSP00000286758	0	0	0	0	0.153	0	0.8	0.692	0.943
CXCL11	CXCL8	9606.ENSP00000306884	9606.ENSP00000306512	0	0	0	0	0.108	0	0	0.698	0.719
CXCL11	DPP4	9606.ENSP00000306884	9606.ENSP00000353731	0	0	0	0	0.062	0.679	0	0.409	0.806
CXCL11	CXCL9	9606.ENSP00000306884	9606.ENSP00000354901	0	0	0	0.846	0.749	0.237	0.9	0.884	0.982
CXCL13	CXCL9	9606.ENSP00000286758	9606.ENSP00000354901	0	0	0	0	0.482	0	0.8	0.727	0.969
CXCL6	IL6	9606.ENSP00000226317	9606.ENSP00000385675	0	0	0	0	0.193	0	0	0.766	0.803
CXCL8	TIMP1	9606.ENSP00000306512	9606.ENSP00000218388	0	0	0	0	0.12	0	0	0.688	0.713
CXCL8	HGF	9606.ENSP00000306512	9606.ENSP00000222390	0	0	0	0	0.077	0	0	0.69	0.701
CXCL8	SERPINE1	9606.ENSP00000306512	9606.ENSP00000223095	0	0	0	0	0.137	0	0	0.703	0.732
CXCL8	TNFAIP6	9606.ENSP00000306512	9606.ENSP00000243347	0	0	0	0	0.182	0.417	0	0.969	0.984
CXCL8	LIF	9606.ENSP00000306512	9606.ENSP00000249075	0	0	0	0	0.172	0	0.9	0.517	0.956
CXCL8	IL1RN	9606.ENSP00000306512	9606.ENSP00000259206	0	0	0	0	0.324	0	0	0.717	0.8
CXCL8	IL9	9606.ENSP00000306512	9606.ENSP00000274520	0	0	0	0	0	0	0	0.718	0.718
CXCL8	S100A8	9606.ENSP00000306512	9606.ENSP00000357722	0	0	0	0	0.189	0	0	0.664	0.716
CXCL8	FN1	9606.ENSP00000306512	9606.ENSP00000346839	0	0	0	0	0	0	0	0.723	0.723
CXCL8	MMP1	9606.ENSP00000306512	9606.ENSP00000322788	0	0	0	0	0.19	0	0	0.715	0.759
CXCL8	CXCL9	9606.ENSP00000306512	9606.ENSP00000354901	0	0	0	0	0.065	0	0	0.78	0.786
CXCL8	SERPINA1	9606.ENSP00000306512	9606.ENSP00000416066	0	0	0	0	0.14	0	0	0.777	0.8
CXCL8	SDC1	9606.ENSP00000306512	9606.ENSP00000370542	0	0	0	0	0	0.27	0	0.794	0.843
CXCL8	MMP9	9606.ENSP00000306512	9606.ENSP00000361405	0	0	0	0	0.134	0.213	0	0.825	0.871
CXCL8	VEGFA	9606.ENSP00000306512	9606.ENSP00000478570	0	0	0	0	0.065	0	0	0.875	0.879
CXCL8	UBE2C	9606.ENSP00000306512	9606.ENSP00000348838	0	0	0	0	0	0	0.9	0.095	0.905
CXCL8	IL6	9606.ENSP00000306512	9606.ENSP00000385675	0	0	0	0	0.581	0	0.9	0.947	0.997
CXCL9	DPP4	9606.ENSP00000354901	9606.ENSP00000353731	0	0	0	0	0.062	0.679	0	0.283	0.765
CXCL9	IDO1	9606.ENSP00000354901	9606.ENSP00000430950	0	0	0	0	0.489	0	0	0.561	0.766
CXCL9	IL6	9606.ENSP00000354901	9606.ENSP00000385675	0	0	0	0	0.093	0	0	0.774	0.786
CXCL9	GBP5	9606.ENSP00000354901	9606.ENSP00000359488	0	0	0	0	0.676	0	0	0.418	0.803
CYTL1	PLAC8	9606.ENSP00000303550	9606.ENSP00000399700	0	0	0	0	0	0	0	0.733	0.733
DEPDC1	DLGAP5	9606.ENSP00000412292	9606.ENSP00000247191	0	0	0	0	0.92	0	0	0.392	0.949
DEPDC1	FAM64A	9606.ENSP00000412292	9606.ENSP00000250056	0	0	0	0	0.571	0	0	0.366	0.716
DEPDC1	NCAPG	9606.ENSP00000412292	9606.ENSP00000251496	0	0	0	0	0.795	0	0	0.194	0.828
DEPDC1	KIF23	9606.ENSP00000412292	9606.ENSP00000260363	0	0	0	0	0.732	0	0	0.241	0.788
DEPDC1	NDC80	9606.ENSP00000412292	9606.ENSP00000261597	0	0	0	0	0.846	0	0	0.074	0.852
DEPDC1	KIF18A	9606.ENSP00000412292	9606.ENSP00000263181	0	0	0	0	0.761	0	0	0.429	0.858
DEPDC1	NEIL3	9606.ENSP00000412292	9606.ENSP00000264596	0	0	0	0	0.692	0	0	0.237	0.755
DEPDC1	NUF2	9606.ENSP00000412292	9606.ENSP00000271452	0	0	0	0	0.644	0	0	0.504	0.816
DEPDC1	MELK	9606.ENSP00000412292	9606.ENSP00000298048	0	0	0	0	0.729	0	0	0.273	0.794
DEPDC1	UBE2C	9606.ENSP00000412292	9606.ENSP00000348838	0	0	0	0	0.67	0	0	0.211	0.729
DEPDC1	RRM2	9606.ENSP00000412292	9606.ENSP00000353770	0	0	0	0	0.773	0	0	0.283	0.83
DEPDC1	EXO1	9606.ENSP00000412292	9606.ENSP00000355506	0	0	0	0	0.675	0	0	0.13	0.705
DEPDC1	NEK2	9606.ENSP00000412292	9606.ENSP00000355966	0	0	0	0	0.876	0	0	0.222	0.9
DEPDC1	TTK	9606.ENSP00000412292	9606.ENSP00000358813	0	0	0	0	0.855	0	0	0.503	0.925
DEPDC1	KIF2C	9606.ENSP00000412292	9606.ENSP00000361298	0	0	0	0	0.794	0	0	0.183	0.824
DEPDC1	KIF4A	9606.ENSP00000412292	9606.ENSP00000363524	0	0	0	0	0.724	0	0	0.2	0.77
DEPDC1	KIF20A	9606.ENSP00000412292	9606.ENSP00000378356	0	0	0	0	0.855	0	0	0.503	0.924
DEPDC1	TOP2A	9606.ENSP00000412292	9606.ENSP00000411532	0	0	0	0	0.939	0	0	0.217	0.95
DEPDC1	HJURP	9606.ENSP00000412292	9606.ENSP00000414109	0	0	0	0	0.813	0	0	0	0.813
DEPDC1	PBK	9606.ENSP00000412292	9606.ENSP00000428489	0	0	0	0	0.815	0	0	0.345	0.874
DEPDC1B	DLGAP5	9606.ENSP00000265036	9606.ENSP00000247191	0	0	0	0	0.732	0	0	0.057	0.737
DEPDC1B	KIF2C	9606.ENSP00000265036	9606.ENSP00000361298	0	0	0	0	0.648	0	0	0.203	0.707
DES	VIM	9606.ENSP00000363071	9606.ENSP00000446007	0	0	0	0.962	0.062	0.8	0.8	0.06	0.959
DKK1	WNT16	9606.ENSP00000363081	9606.ENSP00000222462	0	0	0	0	0	0.058	0.6	0.643	0.853
DKK1	SFRP2	9606.ENSP00000363081	9606.ENSP00000274063	0	0	0	0	0	0.121	0	0.756	0.776
DKK1	TNFRSF11B	9606.ENSP00000363081	9606.ENSP00000297350	0	0	0	0	0.107	0	0	0.689	0.71
DKK1	SFRP4	9606.ENSP00000363081	9606.ENSP00000410715	0	0	0	0	0	0.056	0	0.756	0.759
DLGAP5	TK1	9606.ENSP00000247191	9606.ENSP00000301634	0	0	0	0	0.57	0	0	0.343	0.706
DLGAP5	E2F7	9606.ENSP00000247191	9606.ENSP00000323246	0	0	0	0	0.61	0	0	0.283	0.708
DLGAP5	ERCC6L	9606.ENSP00000247191	9606.ENSP00000334675	0	0	0	0	0.701	0.057	0	0.108	0.726
DLGAP5	NEIL3	9606.ENSP00000247191	9606.ENSP00000264596	0	0	0	0	0.785	0	0	0.046	0.786
DLGAP5	SHCBP1	9606.ENSP00000247191	9606.ENSP00000306473	0	0	0	0	0.777	0	0	0.193	0.813
DLGAP5	TROAP	9606.ENSP00000247191	9606.ENSP00000257909	0	0	0	0	0.804	0	0	0.225	0.842
DLGAP5	TYMS	9606.ENSP00000247191	9606.ENSP00000315644	0	0	0	0	0.819	0	0	0.184	0.846
DLGAP5	EXO1	9606.ENSP00000247191	9606.ENSP00000355506	0	0	0	0	0.823	0	0	0.162	0.846
DLGAP5	FAM64A	9606.ENSP00000247191	9606.ENSP00000250056	0	0	0	0	0.794	0	0	0.434	0.878
DLGAP5	SGOL1	9606.ENSP00000247191	9606.ENSP00000263753	0	0	0	0	0.833	0	0	0.341	0.885
DLGAP5	TACC3	9606.ENSP00000247191	9606.ENSP00000326550	0	0	0	0	0.705	0.15	0	0.64	0.902
DLGAP5	E2F8	9606.ENSP00000247191	9606.ENSP00000481103	0	0	0	0	0.915	0	0	0.265	0.934
DLGAP5	HJURP	9606.ENSP00000247191	9606.ENSP00000414109	0	0	0	0	0.895	0	0	0.401	0.934
DLGAP5	KIAA0101	9606.ENSP00000247191	9606.ENSP00000300035	0	0	0	0	0.894	0	0	0.501	0.945
DLGAP5	KIF18A	9606.ENSP00000247191	9606.ENSP00000263181	0	0	0	0	0.868	0.056	0	0.648	0.952
DLGAP5	RRM2	9606.ENSP00000247191	9606.ENSP00000353770	0	0	0	0	0.916	0	0	0.518	0.958
DLGAP5	PTTG1	9606.ENSP00000247191	9606.ENSP00000377536	0	0	0	0	0.922	0	0	0.507	0.959
DLGAP5	NEK2	9606.ENSP00000247191	9606.ENSP00000355966	0	0	0	0	0.931	0	0	0.467	0.961
DLGAP5	KIF2C	9606.ENSP00000247191	9606.ENSP00000361298	0	0	0	0	0.903	0.058	0	0.606	0.961
DLGAP5	KIF4A	9606.ENSP00000247191	9606.ENSP00000363524	0	0	0	0	0.939	0.056	0	0.515	0.969
DLGAP5	MELK	9606.ENSP00000247191	9606.ENSP00000298048	0	0	0	0	0.942	0	0	0.506	0.97
DLGAP5	KIF23	9606.ENSP00000247191	9606.ENSP00000260363	0	0	0	0	0.956	0.056	0	0.437	0.974
DLGAP5	NUF2	9606.ENSP00000247191	9606.ENSP00000271452	0	0	0	0	0.947	0	0	0.544	0.974
DLGAP5	PBK	9606.ENSP00000247191	9606.ENSP00000428489	0	0	0	0	0.958	0.056	0	0.523	0.979
DLGAP5	KIF20A	9606.ENSP00000247191	9606.ENSP00000378356	0	0	0	0	0.963	0.056	0	0.528	0.982
DLGAP5	UBE2C	9606.ENSP00000247191	9606.ENSP00000348838	0	0	0	0	0.969	0.058	0	0.479	0.983
DLGAP5	NCAPG	9606.ENSP00000247191	9606.ENSP00000251496	0	0	0	0	0.976	0	0	0.51	0.987
DLGAP5	NDC80	9606.ENSP00000247191	9606.ENSP00000261597	0	0	0	0	0.974	0	0	0.559	0.988
DLGAP5	TOP2A	9606.ENSP00000247191	9606.ENSP00000411532	0	0	0	0	0.979	0	0	0.556	0.99
DLGAP5	TTK	9606.ENSP00000247191	9606.ENSP00000358813	0	0	0	0	0.982	0	0	0.52	0.991
DLK1	IGF2	9606.ENSP00000340292	9606.ENSP00000391826	0	0	0	0	0.217	0	0	0.73	0.78
DLK1	FN1	9606.ENSP00000340292	9606.ENSP00000346839	0	0	0	0	0.062	0	0	0.951	0.953
DLX5	NKX3-2	9606.ENSP00000222598	9606.ENSP00000371875	0	0	0	0.639	0.054	0.115	0.65	0.556	0.743
DPP4	LGALS3	9606.ENSP00000353731	9606.ENSP00000254301	0	0	0	0	0	0	0	0.82	0.82
DPP4	FN1	9606.ENSP00000353731	9606.ENSP00000346839	0	0	0	0	0.049	0.176	0	0.988	0.99
DPP4	GLP1R	9606.ENSP00000353731	9606.ENSP00000362353	0	0	0	0	0	0	0	0.937	0.938
DPYD	HPD	9606.ENSP00000359211	9606.ENSP00000289004	0	0	0	0	0.119	0.726	0	0.132	0.772
DPYD	TYMS	9606.ENSP00000359211	9606.ENSP00000315644	0	0	0	0	0.062	0	0	0.889	0.891
DPYD	TYMP	9606.ENSP00000359211	9606.ENSP00000379038	0.073	0	0	0	0.097	0	0.9	0.812	0.982
DRC1	RSPH4A	9606.ENSP00000288710	9606.ENSP00000229554	0	0	0	0	0.103	0	0	0.765	0.78
DRC1	ZMYND10	9606.ENSP00000288710	9606.ENSP00000231749	0	0	0	0	0.185	0	0	0.675	0.724
E2F7	MYBL2	9606.ENSP00000323246	9606.ENSP00000217026	0	0	0	0	0.377	0.176	0	0.484	0.712
E2F7	RRM2	9606.ENSP00000323246	9606.ENSP00000353770	0	0	0	0	0.463	0	0	0.466	0.701
E2F7	E2F8	9606.ENSP00000323246	9606.ENSP00000481103	0	0	0	0.774	0.233	0.486	0.8	0.968	0.933
E2F8	MYBL2	9606.ENSP00000481103	9606.ENSP00000217026	0	0	0	0	0.358	0.176	0	0.535	0.733
E2F8	NCAPG	9606.ENSP00000481103	9606.ENSP00000251496	0	0	0	0	0.611	0	0	0.329	0.728
E2F8	KIAA0101	9606.ENSP00000481103	9606.ENSP00000300035	0	0	0	0	0.749	0	0	0.088	0.761
E2F8	RRM2	9606.ENSP00000481103	9606.ENSP00000353770	0	0	0	0	0.91	0	0	0.397	0.943
E2F8	NEK2	9606.ENSP00000481103	9606.ENSP00000355966	0	0	0	0	0.675	0	0	0.21	0.732
E2F8	TTK	9606.ENSP00000481103	9606.ENSP00000358813	0	0	0	0	0.774	0	0	0.236	0.82
E2F8	KIF2C	9606.ENSP00000481103	9606.ENSP00000361298	0	0	0	0	0.872	0	0	0.176	0.89
E2F8	KIF20A	9606.ENSP00000481103	9606.ENSP00000378356	0	0	0	0	0.767	0	0	0.202	0.806
E2F8	TOP2A	9606.ENSP00000481103	9606.ENSP00000411532	0	0	0	0	0.909	0	0	0.27	0.93
E2F8	HJURP	9606.ENSP00000481103	9606.ENSP00000414109	0	0	0	0	0.794	0	0	0.155	0.818
EFEMP2	LOX	9606.ENSP00000309953	9606.ENSP00000231004	0	0	0	0	0.229	0.622	0	0.98	0.994
EFEMP2	LOXL1	9606.ENSP00000309953	9606.ENSP00000261921	0	0	0	0	0.272	0.056	0	0.677	0.759
EFEMP2	FBLN5	9606.ENSP00000309953	9606.ENSP00000345008	0	0	0	0.945	0.13	0.417	0.65	0.904	0.816
EFEMP2	MFAP5	9606.ENSP00000309953	9606.ENSP00000352455	0	0	0	0	0.062	0	0.6	0.56	0.82
EFEMP2	MFAP2	9606.ENSP00000309953	9606.ENSP00000364685	0	0	0	0	0.1	0	0.6	0.561	0.828
EFHC2	GPR82	9606.ENSP00000404232	9606.ENSP00000303549	0	0	0	0	0	0	0	0.909	0.909
EMR1	IL6	9606.ENSP00000311545	9606.ENSP00000385675	0	0	0	0	0	0	0	0.712	0.712
ERCC6L	NCAPG	9606.ENSP00000334675	9606.ENSP00000251496	0	0	0	0	0.815	0.06	0	0.205	0.85
ERCC6L	MELK	9606.ENSP00000334675	9606.ENSP00000298048	0	0	0	0	0.642	0.076	0	0.263	0.735
ERCC6L	PBK	9606.ENSP00000334675	9606.ENSP00000428489	0	0	0	0	0.65	0.058	0	0.166	0.701
ERCC6L	TTK	9606.ENSP00000334675	9606.ENSP00000358813	0	0	0	0	0.701	0.06	0	0.297	0.785
ERCC6L	EXO1	9606.ENSP00000334675	9606.ENSP00000355506	0	0	0	0	0.679	0.144	0	0.343	0.804
ERCC6L	TOP2A	9606.ENSP00000334675	9606.ENSP00000411532	0	0	0	0	0.583	0.166	0	0.543	0.827
ERCC6L	KIF4A	9606.ENSP00000334675	9606.ENSP00000363524	0	0	0	0	0.811	0.081	0	0.382	0.883
EVC2	GLI1	9606.ENSP00000342144	9606.ENSP00000228682	0	0	0	0	0.062	0	0.9	0.476	0.946
EXO1	NCAPG	9606.ENSP00000355506	9606.ENSP00000251496	0	0	0	0	0.853	0	0	0.234	0.882
EXO1	KIF23	9606.ENSP00000355506	9606.ENSP00000260363	0	0	0	0	0.744	0	0	0.125	0.766
EXO1	NDC80	9606.ENSP00000355506	9606.ENSP00000261597	0	0	0	0	0.709	0.056	0	0.104	0.732
EXO1	NEIL3	9606.ENSP00000355506	9606.ENSP00000264596	0.154	0	0	0	0.708	0	0	0.515	0.869
EXO1	NUF2	9606.ENSP00000355506	9606.ENSP00000271452	0	0	0	0	0.815	0	0	0.146	0.835
EXO1	MELK	9606.ENSP00000355506	9606.ENSP00000298048	0	0	0	0	0.836	0	0	0.263	0.874
EXO1	KIAA0101	9606.ENSP00000355506	9606.ENSP00000300035	0	0	0	0	0.793	0	0	0.206	0.829
EXO1	TYMS	9606.ENSP00000355506	9606.ENSP00000315644	0.058	0	0	0	0.726	0	0	0.306	0.805
EXO1	UBE2C	9606.ENSP00000355506	9606.ENSP00000348838	0	0	0	0	0.743	0.07	0	0.134	0.775
EXO1	RRM2	9606.ENSP00000355506	9606.ENSP00000353770	0.052	0	0	0	0.816	0	0	0.575	0.919
EXO1	PTTG1	9606.ENSP00000355506	9606.ENSP00000377536	0	0	0	0	0.648	0	0	0.237	0.72
EXO1	NEK2	9606.ENSP00000355506	9606.ENSP00000355966	0	0	0	0	0.699	0	0	0.166	0.739
EXO1	KIF4A	9606.ENSP00000355506	9606.ENSP00000363524	0	0	0	0	0.745	0	0	0.183	0.783
EXO1	KIF20A	9606.ENSP00000355506	9606.ENSP00000378356	0	0	0	0	0.812	0	0	0.122	0.827
EXO1	KIF2C	9606.ENSP00000355506	9606.ENSP00000361298	0	0	0	0	0.79	0	0	0.234	0.832
EXO1	PBK	9606.ENSP00000355506	9606.ENSP00000428489	0	0	0	0	0.818	0.076	0	0.106	0.837
EXO1	HJURP	9606.ENSP00000355506	9606.ENSP00000414109	0	0	0	0	0.793	0	0	0.287	0.846
EXO1	TTK	9606.ENSP00000355506	9606.ENSP00000358813	0	0	0	0	0.864	0	0	0.262	0.895
EXO1	ORC1	9606.ENSP00000355506	9606.ENSP00000360623	0.073	0	0	0	0.878	0	0	0.176	0.898
EXO1	TOP2A	9606.ENSP00000355506	9606.ENSP00000411532	0.047	0	0	0	0.792	0.056	0	0.576	0.91
EYA4	SIX2	9606.ENSP00000432770	9606.ENSP00000304502	0	0	0	0	0.108	0.801	0	0.659	0.934
EYA4	HIST1H2BJ	9606.ENSP00000432770	9606.ENSP00000476136	0	0	0	0	0	0	0.9	0	0.9
F13A1	SERPINA5	9606.ENSP00000264870	9606.ENSP00000333203	0	0	0	0	0	0.056	0.9	0.181	0.915
FAM181A	TEAD4	9606.ENSP00000267594	9606.ENSP00000352926	0	0	0	0	0	0.821	0	0	0.821
FAM64A	NEK2	9606.ENSP00000250056	9606.ENSP00000355966	0	0	0	0	0.605	0	0	0.288	0.707
FAM64A	NUF2	9606.ENSP00000250056	9606.ENSP00000271452	0	0	0	0	0.66	0	0	0.222	0.725
FAM64A	KIF4A	9606.ENSP00000250056	9606.ENSP00000363524	0	0	0	0	0.706	0	0	0.16	0.743
FAM64A	PTTG1	9606.ENSP00000250056	9606.ENSP00000377536	0	0	0	0	0.685	0	0	0.241	0.75
FAM64A	RRM2	9606.ENSP00000250056	9606.ENSP00000353770	0	0	0	0	0.677	0	0	0.282	0.758
FAM64A	KIF23	9606.ENSP00000250056	9606.ENSP00000260363	0	0	0	0	0.675	0	0	0.307	0.765
FAM64A	TOP2A	9606.ENSP00000250056	9606.ENSP00000411532	0	0	0	0	0.731	0	0	0.25	0.789
FAM64A	PBK	9606.ENSP00000250056	9606.ENSP00000428489	0	0	0	0	0.798	0	0	0	0.798
FAM64A	MELK	9606.ENSP00000250056	9606.ENSP00000298048	0	0	0	0	0.757	0	0	0.266	0.814
FAM64A	TTK	9606.ENSP00000250056	9606.ENSP00000358813	0	0	0	0	0.786	0	0	0.213	0.824
FAM64A	KIF2C	9606.ENSP00000250056	9606.ENSP00000361298	0	0	0	0	0.816	0	0	0.181	0.843
FAM64A	TROAP	9606.ENSP00000250056	9606.ENSP00000257909	0	0	0	0	0.699	0	0	0.502	0.844
FAM64A	UBE2C	9606.ENSP00000250056	9606.ENSP00000348838	0	0	0	0	0.801	0	0	0.264	0.847
FAM64A	HJURP	9606.ENSP00000250056	9606.ENSP00000414109	0	0	0	0	0.784	0	0	0.385	0.861
FAM64A	NCAPG	9606.ENSP00000250056	9606.ENSP00000251496	0	0	0	0	0.79	0	0	0.401	0.868
FAM64A	KIF20A	9606.ENSP00000250056	9606.ENSP00000378356	0	0	0	0	0.838	0	0	0.279	0.878
FAM83D	KIF23	9606.ENSP00000481110	9606.ENSP00000260363	0	0	0	0	0.737	0	0	0.155	0.768
FAM83D	SHCBP1	9606.ENSP00000481110	9606.ENSP00000306473	0	0	0	0	0.609	0	0	0.446	0.774
FAM83D	NEK2	9606.ENSP00000481110	9606.ENSP00000355966	0	0	0	0	0.611	0	0	0.372	0.745
FAM83D	KIF2C	9606.ENSP00000481110	9606.ENSP00000361298	0	0	0	0	0.585	0	0	0.341	0.715
FAM83D	KIF4A	9606.ENSP00000481110	9606.ENSP00000363524	0	0	0	0	0.66	0	0	0.651	0.876
FAM83D	KIF20A	9606.ENSP00000481110	9606.ENSP00000378356	0	0	0	0	0.701	0.27	0	0.223	0.816
FAM83D	TOP2A	9606.ENSP00000481110	9606.ENSP00000411532	0	0	0	0	0.739	0	0	0.164	0.772
FAM83D	PBK	9606.ENSP00000481110	9606.ENSP00000428489	0	0	0	0	0.734	0	0	0.18	0.772
FAP	POSTN	9606.ENSP00000188790	9606.ENSP00000369071	0	0	0	0	0.573	0	0	0.378	0.723
FAP	FN1	9606.ENSP00000188790	9606.ENSP00000346839	0	0	0	0	0.2	0.163	0	0.67	0.76
FBLIM1	FLNC	9606.ENSP00000416387	9606.ENSP00000327145	0	0	0	0	0.096	0.803	0.6	0.364	0.948
FBLN5	LOX	9606.ENSP00000345008	9606.ENSP00000231004	0	0	0	0	0.169	0.507	0.9	0.787	0.99
FBLN5	LOXL4	9606.ENSP00000345008	9606.ENSP00000260702	0	0	0	0	0.084	0.057	0.9	0.396	0.94
FBLN5	LOXL1	9606.ENSP00000345008	9606.ENSP00000261921	0	0	0	0	0.108	0.494	0.9	0.988	0.999
FBLN5	PLAU	9606.ENSP00000345008	9606.ENSP00000361850	0	0	0	0	0.062	0.056	0	0.705	0.716
FBLN5	MFAP5	9606.ENSP00000345008	9606.ENSP00000352455	0	0	0	0	0.114	0	0.6	0.4	0.769
FBLN5	MFAP2	9606.ENSP00000345008	9606.ENSP00000364685	0	0	0	0	0.062	0	0.6	0.616	0.843
FBLN5	LOXL2	9606.ENSP00000345008	9606.ENSP00000373783	0	0	0	0	0.085	0.057	0.9	0.564	0.957
FCGBP	TFF3	9606.ENSP00000481056	9606.ENSP00000430690	0	0	0	0	0.076	0	0	0.982	0.983
FCGR2B	LILRB3	9606.ENSP00000351497	9606.ENSP00000245620	0	0	0	0	0.231	0	0.8	0.465	0.91
FCGR2B	LGALS3	9606.ENSP00000351497	9606.ENSP00000254301	0	0	0	0	0.064	0.27	0	0.691	0.77
FCGR2B	LILRA5	9606.ENSP00000351497	9606.ENSP00000404236	0	0	0	0	0.128	0	0.8	0.167	0.842
FCGR3A	LILRB3	9606.ENSP00000356946	9606.ENSP00000245620	0	0	0	0	0.295	0	0.8	0.282	0.89
FCGR3A	IL7R	9606.ENSP00000356946	9606.ENSP00000306157	0	0	0	0	0.104	0	0	0.701	0.72
FCGR3A	LCK	9606.ENSP00000356946	9606.ENSP00000337825	0	0	0	0	0	0.47	0	0.723	0.847
FCGR3A	VAV3	9606.ENSP00000356946	9606.ENSP00000359073	0	0	0	0	0.065	0	0.6	0.297	0.714
FCGR3A	PRF1	9606.ENSP00000356946	9606.ENSP00000398568	0	0	0	0	0.23	0	0	0.739	0.79
FCGR3A	LILRA5	9606.ENSP00000356946	9606.ENSP00000404236	0	0	0	0	0.134	0	0.8	0.181	0.845
FMOD	LUM	9606.ENSP00000347041	9606.ENSP00000266718	0	0	0.447	0.928	0.353	0	0.9	0.919	0.938
FMOD	FN1	9606.ENSP00000347041	9606.ENSP00000346839	0	0	0	0	0.107	0	0	0.691	0.713
FMOD	TNMD	9606.ENSP00000347041	9606.ENSP00000362122	0	0	0	0	0.1	0	0	0.736	0.752
FMOD	TGFB2	9606.ENSP00000347041	9606.ENSP00000355896	0	0	0	0	0.072	0.225	0.6	0.371	0.795
FN1	LGALS1	9606.ENSP00000346839	9606.ENSP00000215909	0	0	0	0	0.111	0.074	0	0.7	0.732
FN1	TIMP1	9606.ENSP00000346839	9606.ENSP00000218388	0	0	0	0	0.112	0	0	0.744	0.763
FN1	PLAT	9606.ENSP00000346839	9606.ENSP00000220809	0	0	0	0	0.177	0.27	0	0.779	0.856
FN1	HGF	9606.ENSP00000346839	9606.ENSP00000222390	0	0	0	0	0.062	0.6	0	0.827	0.929
FN1	SERPINE1	9606.ENSP00000346839	9606.ENSP00000223095	0	0	0	0	0.295	0	0	0.749	0.815
FN1	MGP	9606.ENSP00000346839	9606.ENSP00000228938	0	0	0	0	0.09	0	0	0.818	0.828
FN1	LOX	9606.ENSP00000346839	9606.ENSP00000231004	0	0	0	0	0.36	0.644	0	0.969	0.992
FN1	TWIST1	9606.ENSP00000346839	9606.ENSP00000242261	0	0	0	0	0.144	0	0	0.689	0.723
FN1	TNFAIP6	9606.ENSP00000346839	9606.ENSP00000243347	0	0	0	0	0.062	0.318	0	0.702	0.793
FN1	PI3	9606.ENSP00000346839	9606.ENSP00000243924	0	0	0	0	0	0	0	0.864	0.864
FN1	SNAI1	9606.ENSP00000346839	9606.ENSP00000244050	0	0	0	0	0.062	0.27	0	0.822	0.867
FN1	LGALS3	9606.ENSP00000346839	9606.ENSP00000254301	0	0	0	0	0.062	0.254	0	0.987	0.99
FN1	MMP7	9606.ENSP00000346839	9606.ENSP00000260227	0	0	0	0	0	0	0	0.752	0.752
FN1	THBS1	9606.ENSP00000346839	9606.ENSP00000260356	0	0	0	0	0.17	0.684	0.72	0.985	0.998
FN1	LUM	9606.ENSP00000346839	9606.ENSP00000266718	0	0	0	0	0.336	0	0	0.645	0.755
FN1	SFRP2	9606.ENSP00000346839	9606.ENSP00000274063	0	0	0	0	0.089	0	0	0.701	0.716
FN1	ITGA5	9606.ENSP00000346839	9606.ENSP00000293379	0	0	0	0	0.153	0.87	0.9	0.989	0.999
FN1	MMP14	9606.ENSP00000346839	9606.ENSP00000308208	0	0	0	0	0.315	0	0	0.705	0.79
FN1	MET	9606.ENSP00000346839	9606.ENSP00000317272	0	0	0	0	0.098	0	0	0.753	0.768
FN1	MMP1	9606.ENSP00000346839	9606.ENSP00000322788	0	0	0	0	0.139	0	0	0.696	0.727
FN1	PLAUR	9606.ENSP00000346839	9606.ENSP00000339328	0	0	0	0	0.062	0	0.9	0.844	0.984
FN1	VIM	9606.ENSP00000346839	9606.ENSP00000446007	0	0	0	0	0.129	0.074	0	0.716	0.751
FN1	TGFB2	9606.ENSP00000346839	9606.ENSP00000355896	0	0	0	0	0.147	0	0	0.729	0.759
FN1	LOXL2	9606.ENSP00000346839	9606.ENSP00000373783	0	0	0	0	0.228	0.429	0	0.507	0.764
FN1	IL6	9606.ENSP00000346839	9606.ENSP00000385675	0	0	0	0	0.074	0	0	0.891	0.895
FN1	TGFBI	9606.ENSP00000346839	9606.ENSP00000416330	0	0	0	0	0.224	0.462	0	0.885	0.948
FN1	PLAU	9606.ENSP00000346839	9606.ENSP00000361850	0	0	0	0	0.102	0	0.9	0.69	0.969
FN1	SPP1	9606.ENSP00000346839	9606.ENSP00000378517	0	0	0	0	0.102	0	0	0.981	0.983
FN1	IGFBP3	9606.ENSP00000346839	9606.ENSP00000370473	0	0	0	0	0.303	0.486	0	0.961	0.985
FN1	VEGFA	9606.ENSP00000346839	9606.ENSP00000478570	0	0	0	0	0.076	0.27	0	0.989	0.992
FN1	POSTN	9606.ENSP00000346839	9606.ENSP00000369071	0	0	0	0	0.339	0	0	0.988	0.992
FN1	SDC1	9606.ENSP00000346839	9606.ENSP00000370542	0	0	0	0	0.117	0	0.8	0.988	0.997
FN1	ITGB3	9606.ENSP00000346839	9606.ENSP00000452786	0	0	0	0	0.1	0.974	0.9	0.972	0.999
FPR2	PLAUR	9606.ENSP00000468897	9606.ENSP00000339328	0	0	0	0	0.099	0	0.9	0.897	0.989
FPR2	SAA1	9606.ENSP00000468897	9606.ENSP00000384906	0	0	0	0	0	0	0.6	0.6	0.833
GAL	NTS	9606.ENSP00000265643	9606.ENSP00000256010	0	0	0	0	0.166	0	0	0.801	0.827
GATA4	MYOD1	9606.ENSP00000334458	9606.ENSP00000250003	0	0	0	0	0	0	0	0.712	0.712
GATA4	NKX2-5	9606.ENSP00000334458	9606.ENSP00000327758	0	0	0	0	0.141	0.801	0.9	0.992	0.999
GATA4	HAND2	9606.ENSP00000334458	9606.ENSP00000352565	0	0	0	0	0.091	0.297	0	0.949	0.964
GBP1	OASL	9606.ENSP00000359504	9606.ENSP00000257570	0	0	0	0	0.347	0	0	0.605	0.731
GBP1	GBP5	9606.ENSP00000359504	9606.ENSP00000359488	0	0	0	0.97	0.789	0.129	0	0.906	0.814
GBP1	OAS1	9606.ENSP00000359504	9606.ENSP00000388001	0	0	0	0	0.317	0	0	0.614	0.725
GBP1	MX1	9606.ENSP00000359504	9606.ENSP00000381601	0	0	0	0	0.394	0	0	0.671	0.792
GDF15	HAMP	9606.ENSP00000252809	9606.ENSP00000471894	0	0	0	0	0	0	0	0.702	0.702
GIG25	HP	9606.ENSP00000376793	9606.ENSP00000348170	0	0	0	0	0.066	0.12	0	0.715	0.745
GJB2	GJD3	9606.ENSP00000372295	9606.ENSP00000463752	0	0	0	0.873	0	0	0.9	0.611	0.907
GNLY	GZMH	9606.ENSP00000263863	9606.ENSP00000216338	0	0	0	0	0.791	0	0	0.596	0.912
GNLY	GZMA	9606.ENSP00000263863	9606.ENSP00000274306	0	0	0	0	0.778	0	0	0.684	0.927
GNLY	PRF1	9606.ENSP00000263863	9606.ENSP00000398568	0	0	0	0	0.783	0	0	0.942	0.987
GPR1	RARRES2	9606.ENSP00000480405	9606.ENSP00000418009	0	0	0	0	0	0	0	0.988	0.988
GPX8	SOD3	9606.ENSP00000423822	9606.ENSP00000371554	0.044	0	0	0	0.112	0.178	0.9	0.443	0.954
GPX8	SOD2	9606.ENSP00000423822	9606.ENSP00000446252	0	0	0	0	0.062	0.254	0.9	0.463	0.957
GRIK1	GRIN3A	9606.ENSP00000382791	9606.ENSP00000355155	0	0	0	0.592	0.097	0.149	0.54	0.696	0.722
GSG2	SGOL1	9606.ENSP00000325290	9606.ENSP00000263753	0	0	0	0	0.211	0.058	0	0.743	0.792
GSG2	TTK	9606.ENSP00000325290	9606.ENSP00000358813	0	0	0	0	0.371	0	0	0.62	0.751
GSG2	KIF2C	9606.ENSP00000325290	9606.ENSP00000361298	0	0	0	0	0.365	0	0	0.68	0.788
GZMA	IL2RB	9606.ENSP00000274306	9606.ENSP00000216223	0	0	0	0	0.591	0	0	0.434	0.758
GZMA	GZMH	9606.ENSP00000274306	9606.ENSP00000216338	0	0	0.447	0.873	0.816	0	0	0.755	0.843
GZMA	PRF1	9606.ENSP00000274306	9606.ENSP00000398568	0	0	0	0	0.73	0	0.9	0.872	0.996
GZMH	PRF1	9606.ENSP00000216338	9606.ENSP00000398568	0	0	0	0	0.782	0	0	0.518	0.89
GZMH	IGF2	9606.ENSP00000216338	9606.ENSP00000391826	0	0	0	0	0	0	0.9	0	0.9
GZMH	IGFBP3	9606.ENSP00000216338	9606.ENSP00000370473	0	0	0	0	0	0	0.9	0.12	0.908
HAMP	IL6	9606.ENSP00000471894	9606.ENSP00000385675	0	0	0	0	0	0	0	0.757	0.757
HAMP	HFE	9606.ENSP00000471894	9606.ENSP00000417404	0	0	0	0	0.062	0	0	0.913	0.915
HAND2	NKX2-5	9606.ENSP00000352565	9606.ENSP00000327758	0	0	0	0	0.095	0.182	0.9	0.93	0.994
HAND2	HOXD13	9606.ENSP00000352565	9606.ENSP00000376322	0	0	0	0	0.08	0.345	0	0.542	0.7
HAND2	NKX3-2	9606.ENSP00000352565	9606.ENSP00000371875	0	0	0	0	0.062	0.136	0	0.744	0.774
HBA1	HP	9606.ENSP00000322421	9606.ENSP00000348170	0	0	0	0	0.077	0.864	0.72	0.622	0.984
HFE	HIST1H2BJ	9606.ENSP00000417404	9606.ENSP00000476136	0	0	0	0	0.11	0.709	0	0.175	0.767
HGF	TIMP1	9606.ENSP00000222390	9606.ENSP00000218388	0	0	0	0	0.065	0	0.5	0.602	0.797
HGF	LAMB1	9606.ENSP00000222390	9606.ENSP00000222399	0	0	0	0	0.053	0	0.9	0.091	0.906
HGF	SAA1	9606.ENSP00000222390	9606.ENSP00000384906	0	0	0	0	0	0	0.9	0.134	0.909
HGF	VEGFA	9606.ENSP00000222390	9606.ENSP00000478570	0	0	0	0	0	0	0.5	0.86	0.927
HGF	PLAU	9606.ENSP00000222390	9606.ENSP00000361850	0	0	0	0.666	0	0.213	0.9	0.602	0.933
HGF	PLAUR	9606.ENSP00000222390	9606.ENSP00000339328	0	0	0	0	0	0.058	0.9	0.511	0.949
HGF	MMP1	9606.ENSP00000222390	9606.ENSP00000322788	0	0	0	0	0.067	0	0.9	0.527	0.952
HGF	LIF	9606.ENSP00000222390	9606.ENSP00000249075	0	0	0	0	0	0	0.9	0.573	0.955
HGF	MMP9	9606.ENSP00000222390	9606.ENSP00000361405	0	0	0	0	0.062	0	0.9	0.705	0.97
HGF	IL6	9606.ENSP00000222390	9606.ENSP00000385675	0	0	0	0	0.06	0	0.9	0.736	0.973
HGF	SDC1	9606.ENSP00000222390	9606.ENSP00000370542	0	0	0	0	0	0.27	0.9	0.963	0.997
HGF	MET	9606.ENSP00000222390	9606.ENSP00000317272	0	0	0	0	0.062	0.98	0.9	0.991	0.999
HIST1H2BJ	THBS1	9606.ENSP00000476136	9606.ENSP00000260356	0	0	0	0	0	0	0.9	0	0.9
HIST1H2BJ	HIST1H3J	9606.ENSP00000476136	9606.ENSP00000352252	0	0.001	0	0	0.268	0.863	0	0.445	0.939
HJURP	NCAPG	9606.ENSP00000414109	9606.ENSP00000251496	0	0	0	0	0.835	0	0	0.37	0.891
HJURP	TROAP	9606.ENSP00000414109	9606.ENSP00000257909	0	0	0	0	0.883	0	0	0.295	0.914
HJURP	KIF23	9606.ENSP00000414109	9606.ENSP00000260363	0	0	0	0	0.767	0	0	0.294	0.828
HJURP	NDC80	9606.ENSP00000414109	9606.ENSP00000261597	0	0	0	0	0.916	0	0	0.374	0.945
HJURP	NUF2	9606.ENSP00000414109	9606.ENSP00000271452	0	0	0	0	0.578	0	0	0.366	0.721
HJURP	SKA1	9606.ENSP00000414109	9606.ENSP00000285116	0	0	0	0	0.531	0	0	0.459	0.735
HJURP	MELK	9606.ENSP00000414109	9606.ENSP00000298048	0	0	0	0	0.842	0	0	0.456	0.91
HJURP	KIAA0101	9606.ENSP00000414109	9606.ENSP00000300035	0	0	0	0	0.834	0	0	0.102	0.844
HJURP	TYMS	9606.ENSP00000414109	9606.ENSP00000315644	0	0	0	0	0.685	0	0	0.171	0.727
HJURP	UBE2C	9606.ENSP00000414109	9606.ENSP00000348838	0	0	0	0	0.889	0	0	0.374	0.927
HJURP	RRM2	9606.ENSP00000414109	9606.ENSP00000353770	0	0	0	0	0.885	0	0	0.261	0.911
HJURP	NEK2	9606.ENSP00000414109	9606.ENSP00000355966	0	0	0	0	0.912	0	0	0.209	0.928
HJURP	TTK	9606.ENSP00000414109	9606.ENSP00000358813	0	0	0	0	0.898	0	0	0.401	0.936
HJURP	KIF2C	9606.ENSP00000414109	9606.ENSP00000361298	0	0	0	0	0.89	0	0	0.358	0.926
HJURP	KIF4A	9606.ENSP00000414109	9606.ENSP00000363524	0	0	0	0	0.81	0	0	0.431	0.887
HJURP	PTTG1	9606.ENSP00000414109	9606.ENSP00000377536	0	0	0	0	0.815	0	0	0.217	0.848
HJURP	KIF20A	9606.ENSP00000414109	9606.ENSP00000378356	0	0	0	0	0.917	0	0	0.299	0.939
HJURP	TOP2A	9606.ENSP00000414109	9606.ENSP00000411532	0	0	0	0	0.901	0	0	0.376	0.936
HJURP	PBK	9606.ENSP00000414109	9606.ENSP00000428489	0	0	0	0	0.827	0	0	0.129	0.843
HLA-DPA1	HLA-DQA1	9606.ENSP00000393566	9606.ENSP00000339398	0	0	0	0.953	0.352	0	0.72	0.866	0.818
HLA-DPA1	HLA-DRB1	9606.ENSP00000393566	9606.ENSP00000353099	0	0	0	0.648	0.574	0.345	0.9	0.773	0.977
HLA-DPA1	HLA-DQA2	9606.ENSP00000393566	9606.ENSP00000364076	0	0	0	0.953	0.371	0	0.6	0.865	0.748
HLA-DPA1	HLA-DQB1	9606.ENSP00000393566	9606.ENSP00000364080	0	0	0	0.653	0.373	0.345	0.72	0.883	0.913
HLA-DPA1	HLA-DRA	9606.ENSP00000393566	9606.ENSP00000378786	0	0	0	0.957	0.56	0	0.9	0.785	0.955
HLA-DPA1	PDCD1LG2	9606.ENSP00000393566	9606.ENSP00000380855	0	0	0	0	0.08	0	0.9	0.193	0.919
HLA-DPA1	HLA-DQB2	9606.ENSP00000393566	9606.ENSP00000390431	0	0	0	0.653	0.174	0.345	0.9	0.748	0.956
HLA-DQA1	HLA-DRA	9606.ENSP00000339398	9606.ENSP00000378786	0	0	0	0.95	0.556	0	0.72	0.785	0.875
HLA-DQA1	HLA-DRB1	9606.ENSP00000339398	9606.ENSP00000353099	0	0	0	0.645	0.241	0.375	0.72	0.926	0.902
HLA-DQA1	PDCD1LG2	9606.ENSP00000339398	9606.ENSP00000380855	0	0	0	0	0.062	0	0.9	0.296	0.928
HLA-DQA1	HLA-DQB2	9606.ENSP00000339398	9606.ENSP00000390431	0	0	0	0.672	0.552	0.94	0.72	0.66	0.993
HLA-DQA1	HLA-DQB1	9606.ENSP00000339398	9606.ENSP00000364080	0	0	0	0.641	0.556	0.994	0.72	0.926	0.999
HLA-DQA2	HLA-DRB1	9606.ENSP00000364076	9606.ENSP00000353099	0	0	0	0.638	0.264	0.375	0.6	0.908	0.865
HLA-DQA2	HLA-DRA	9606.ENSP00000364076	9606.ENSP00000378786	0	0	0	0.946	0.564	0	0.6	0.842	0.826
HLA-DQA2	PDCD1LG2	9606.ENSP00000364076	9606.ENSP00000380855	0	0	0	0	0.062	0	0.9	0.241	0.922
HLA-DQA2	HLA-DQB1	9606.ENSP00000364076	9606.ENSP00000364080	0	0	0	0.629	0.492	0.826	0.6	0.904	0.974
HLA-DQA2	HLA-DQB2	9606.ENSP00000364076	9606.ENSP00000390431	0	0	0	0.664	0.515	0.94	0.6	0.774	0.99
HLA-DQB1	HLA-DRB1	9606.ENSP00000364080	9606.ENSP00000353099	0	0	0	0.963	0.482	0	0.72	0.931	0.854
HLA-DQB1	HLA-DQB2	9606.ENSP00000364080	9606.ENSP00000390431	0	0	0	0.974	0.138	0	0.72	0.686	0.752
HLA-DQB1	HLA-DRA	9606.ENSP00000364080	9606.ENSP00000378786	0	0	0	0.641	0.407	0.345	0.72	0.811	0.915
HLA-DQB1	PDCD1LG2	9606.ENSP00000364080	9606.ENSP00000380855	0	0	0	0	0.062	0	0.9	0.186	0.917
HLA-DQB2	HLA-DRB1	9606.ENSP00000390431	9606.ENSP00000353099	0	0	0	0.956	0.31	0	0.9	0.685	0.93
HLA-DQB2	HLA-DRA	9606.ENSP00000390431	9606.ENSP00000378786	0	0	0	0.66	0.174	0.345	0.9	0.652	0.953
HLA-DQB2	PDCD1LG2	9606.ENSP00000390431	9606.ENSP00000380855	0	0	0	0	0.063	0	0.9	0.202	0.918
HLA-DRA	LCK	9606.ENSP00000378786	9606.ENSP00000337825	0	0	0	0	0.087	0	0.9	0.147	0.915
HLA-DRA	HLA-DRB1	9606.ENSP00000378786	9606.ENSP00000353099	0	0	0	0.642	0.869	0.992	0.9	0.908	0.999
HLA-DRA	VIM	9606.ENSP00000378786	9606.ENSP00000446007	0	0	0	0	0	0.8	0	0.125	0.817
HLA-DRA	PDCD1LG2	9606.ENSP00000378786	9606.ENSP00000380855	0	0	0	0	0.062	0	0.9	0.283	0.926
HLA-DRB1	LCK	9606.ENSP00000353099	9606.ENSP00000337825	0	0	0	0	0.065	0	0.9	0.189	0.917
HLA-DRB1	PDCD1LG2	9606.ENSP00000353099	9606.ENSP00000380855	0	0	0	0	0.062	0	0.9	0.215	0.92
HOXA10	HOXA9	9606.ENSP00000283921	9606.ENSP00000343619	0	0	0	0.781	0.821	0	0	0.903	0.856
HOXA2	HOXA5	9606.ENSP00000222718	9606.ENSP00000222726	0	0	0	0.717	0.231	0.697	0	0.809	0.812
HOXA5	HOXB2	9606.ENSP00000222726	9606.ENSP00000331741	0	0	0	0.713	0.101	0.697	0	0.776	0.778
HOXA5	HOXC6	9606.ENSP00000222726	9606.ENSP00000243108	0	0	0	0.848	0.13	0.8	0	0.712	0.837
HOXA5	HOXB7	9606.ENSP00000222726	9606.ENSP00000239165	0	0	0	0.846	0.12	0.822	0	0.88	0.859
HOXA5	HOXB4	9606.ENSP00000222726	9606.ENSP00000328928	0	0	0	0.844	0.234	0.811	0	0.793	0.868
HOXA5	HOXC4	9606.ENSP00000222726	9606.ENSP00000399808	0	0	0	0.839	0.24	0.811	0	0.804	0.87
HOXA5	HOXA7	9606.ENSP00000222726	9606.ENSP00000242159	0	0	0	0.841	0.355	0.8	0	0.811	0.882
HOXA5	HOXA6	9606.ENSP00000222726	9606.ENSP00000222728	0	0	0	0.842	0.362	0.8	0	0.789	0.883
HOXA6	HOXC6	9606.ENSP00000222728	9606.ENSP00000243108	0	0	0	0.919	0.118	0.8	0	0.572	0.824
HOXA6	HOXB7	9606.ENSP00000222728	9606.ENSP00000239165	0	0	0	0.845	0.098	0.8	0	0.504	0.826
HOXA6	HOXC4	9606.ENSP00000222728	9606.ENSP00000399808	0	0	0	0.81	0.121	0.8	0	0.585	0.836
HOXA6	HOXB4	9606.ENSP00000222728	9606.ENSP00000328928	0	0	0	0.809	0.122	0.8	0	0.616	0.837
HOXA6	HOXA7	9606.ENSP00000222728	9606.ENSP00000242159	0	0	0	0.83	0.387	0.8	0	0.814	0.889
HOXA7	HOXB7	9606.ENSP00000242159	9606.ENSP00000239165	0	0	0	0.949	0.139	0.8	0	0.681	0.826
HOXA7	HOXC4	9606.ENSP00000242159	9606.ENSP00000399808	0	0	0	0.826	0.119	0.8	0	0.565	0.833
HOXA7	HOXC6	9606.ENSP00000242159	9606.ENSP00000243108	0	0	0	0.851	0.157	0.8	0	0.661	0.841
HOXA7	HOXB4	9606.ENSP00000242159	9606.ENSP00000328928	0	0	0	0.812	0.143	0.8	0	0.625	0.841
HOXB13	TEAD4	9606.ENSP00000290295	9606.ENSP00000352926	0	0	0	0	0	0.8	0	0.059	0.803
HOXB13	PRRX2	9606.ENSP00000290295	9606.ENSP00000361547	0	0	0	0	0	0.078	0	0.819	0.825
HOXB4	HOXB7	9606.ENSP00000328928	9606.ENSP00000239165	0	0	0	0.824	0.175	0.82	0	0.824	0.867
HOXB4	HOXC6	9606.ENSP00000328928	9606.ENSP00000243108	0	0	0	0.806	0.098	0.8	0	0.73	0.838
HOXB4	HOXC4	9606.ENSP00000328928	9606.ENSP00000399808	0	0	0	0.94	0.172	0.8	0	0.773	0.835
HOXB7	SIX2	9606.ENSP00000239165	9606.ENSP00000304502	0	0	0	0	0.062	0.061	0	0.702	0.715
HOXB7	HOXC6	9606.ENSP00000239165	9606.ENSP00000243108	0	0	0	0.849	0.157	0.8	0	0.764	0.844
HOXB7	HOXC4	9606.ENSP00000239165	9606.ENSP00000399808	0	0	0	0.836	0.111	0.82	0	0.714	0.852
HOXC4	HOXC6	9606.ENSP00000399808	9606.ENSP00000243108	0	0	0	0.803	0.377	0.8	0	0.801	0.89
HOXD10	HOXD11	9606.ENSP00000249501	9606.ENSP00000249504	0	0	0	0.681	0.763	0	0	0.871	0.828
HP	TTR	9606.ENSP00000348170	9606.ENSP00000237014	0	0	0	0	0.062	0	0	0.838	0.842
HP	IL6	9606.ENSP00000348170	9606.ENSP00000385675	0	0	0	0	0	0	0	0.718	0.718
HP	SAA2	9606.ENSP00000348170	9606.ENSP00000436126	0	0	0	0	0.078	0	0.54	0.431	0.737
HP	SAA1	9606.ENSP00000348170	9606.ENSP00000384906	0	0	0	0	0.063	0	0.54	0.665	0.843
HP	MMP9	9606.ENSP00000348170	9606.ENSP00000361405	0	0	0	0	0.062	0	0	0.865	0.868
HP	SERPINA1	9606.ENSP00000348170	9606.ENSP00000416066	0	0	0	0	0.171	0.12	0	0.878	0.904
HPD	IL4I1	9606.ENSP00000289004	9606.ENSP00000472474	0.053	0	0	0	0	0	0.9	0.147	0.912
HS3ST3A1	HS3ST3B1	9606.ENSP00000284110	9606.ENSP00000354213	0	0	0.416	0.971	0.105	0	0.8	0.926	0.82
HS3ST3A1	SDC1	9606.ENSP00000284110	9606.ENSP00000370542	0	0	0	0	0.065	0	0.9	0.21	0.919
HS3ST3B1	SDC1	9606.ENSP00000354213	9606.ENSP00000370542	0	0	0	0	0.062	0	0.9	0.232	0.921
IBSP	SPP1	9606.ENSP00000226284	9606.ENSP00000378517	0	0	0	0	0.089	0	0	0.911	0.916
IBSP	ITGB3	9606.ENSP00000226284	9606.ENSP00000452786	0	0	0	0	0	0.144	0.9	0.211	0.926
IDO1	SOCS3	9606.ENSP00000430950	9606.ENSP00000330341	0	0	0	0	0.079	0.182	0	0.85	0.877
IDO1	PDCD1LG2	9606.ENSP00000430950	9606.ENSP00000380855	0	0	0	0	0.062	0	0	0.71	0.716
IDO1	IL4I1	9606.ENSP00000430950	9606.ENSP00000472474	0	0	0	0	0.075	0	0.9	0.137	0.913
IDO1	TDO2	9606.ENSP00000430950	9606.ENSP00000444788	0	0	0	0	0	0	0.8	0.862	0.971
IGF2	IGFBP2	9606.ENSP00000391826	9606.ENSP00000233809	0	0	0	0	0.115	0.213	0.6	0.989	0.996
IGF2	MYOD1	9606.ENSP00000391826	9606.ENSP00000250003	0	0	0	0	0	0	0	0.811	0.811
IGF2	IGF2BP3	9606.ENSP00000391826	9606.ENSP00000258729	0	0	0	0	0	0	0	0.747	0.747
IGF2	MET	9606.ENSP00000391826	9606.ENSP00000317272	0	0	0	0	0.062	0	0.6	0.415	0.761
IGF2	MMP1	9606.ENSP00000391826	9606.ENSP00000322788	0	0	0	0	0.076	0	0.9	0.266	0.926
IGF2	PLAUR	9606.ENSP00000391826	9606.ENSP00000339328	0	0	0	0	0	0	0	0.772	0.772
IGF2	IGFBP3	9606.ENSP00000391826	9606.ENSP00000370473	0	0	0	0	0.155	0.873	0.6	0.989	0.999
IGFBP2	ITGA5	9606.ENSP00000233809	9606.ENSP00000293379	0	0	0	0	0.062	0	0	0.953	0.954
IGFBP3	MMP1	9606.ENSP00000370473	9606.ENSP00000322788	0	0	0	0	0.142	0.213	0.9	0.335	0.949
IL13RA2	IL6	9606.ENSP00000361004	9606.ENSP00000385675	0	0	0	0	0.062	0	0.6	0.281	0.707
IL1R2	IL1RN	9606.ENSP00000330959	9606.ENSP00000259206	0	0	0	0	0.343	0.282	0.9	0.632	0.98
IL1R2	IL1RAP	9606.ENSP00000330959	9606.ENSP00000314807	0	0	0	0.616	0	0.934	0	0.937	0.958
IL1RAP	IL1RN	9606.ENSP00000314807	9606.ENSP00000259206	0	0	0	0	0.081	0	0.9	0.461	0.946
IL1RN	IL6	9606.ENSP00000259206	9606.ENSP00000385675	0	0	0	0	0.112	0	0	0.789	0.805
IL2RA	IL2RB	9606.ENSP00000369293	9606.ENSP00000216223	0	0	0	0	0.089	0.463	0.9	0.986	0.999
IL2RA	IL9	9606.ENSP00000369293	9606.ENSP00000274520	0	0	0	0	0	0	0.6	0.663	0.859
IL2RA	RUNX1	9606.ENSP00000369293	9606.ENSP00000300305	0	0	0	0	0	0.182	0.9	0.147	0.924
IL2RA	IL7R	9606.ENSP00000369293	9606.ENSP00000306157	0	0	0	0	0.082	0	0	0.728	0.739
IL2RA	SOCS1	9606.ENSP00000369293	9606.ENSP00000329418	0	0	0	0	0	0	0.9	0.401	0.937
IL2RA	SOCS3	9606.ENSP00000369293	9606.ENSP00000330341	0	0	0	0	0.062	0	0.9	0.323	0.93
IL2RA	LCK	9606.ENSP00000369293	9606.ENSP00000337825	0	0	0	0	0.082	0	0.9	0.874	0.987
IL2RA	IL6	9606.ENSP00000369293	9606.ENSP00000385675	0	0	0	0	0	0	0.6	0.68	0.866
IL2RB	IL6	9606.ENSP00000216223	9606.ENSP00000385675	0	0	0	0	0	0	0.6	0.413	0.755
IL2RB	IL9	9606.ENSP00000216223	9606.ENSP00000274520	0	0	0	0	0.049	0	0.6	0.431	0.764
IL2RB	PRF1	9606.ENSP00000216223	9606.ENSP00000398568	0	0	0	0	0.62	0	0	0.633	0.855
IL2RB	IL7R	9606.ENSP00000216223	9606.ENSP00000306157	0	0	0	0	0.535	0	0	0.805	0.905
IL2RB	SOCS2	9606.ENSP00000216223	9606.ENSP00000481249	0	0	0	0	0	0	0.9	0.133	0.909
IL2RB	SOCS3	9606.ENSP00000216223	9606.ENSP00000330341	0	0	0	0	0.062	0.27	0.9	0.236	0.94
IL2RB	SOCS1	9606.ENSP00000216223	9606.ENSP00000329418	0	0	0	0	0.096	0.482	0.9	0.255	0.96
IL2RB	LCK	9606.ENSP00000216223	9606.ENSP00000337825	0	0	0	0	0.187	0.462	0.9	0.723	0.986
IL4I1	TDO2	9606.ENSP00000472474	9606.ENSP00000444788	0	0	0	0	0.062	0	0.9	0.124	0.91
IL6	TIMP1	9606.ENSP00000385675	9606.ENSP00000218388	0	0	0	0	0.1	0	0.9	0.74	0.974
IL6	NAMPT	9606.ENSP00000385675	9606.ENSP00000222553	0	0	0	0	0.099	0	0	0.683	0.702
IL6	SERPINE1	9606.ENSP00000385675	9606.ENSP00000223095	0	0	0	0	0.16	0	0	0.803	0.827
IL6	LIF	9606.ENSP00000385675	9606.ENSP00000249075	0	0	0	0	0.178	0	0.9	0.761	0.978
IL6	MMP13	9606.ENSP00000385675	9606.ENSP00000260302	0	0	0	0	0.065	0	0	0.697	0.705
IL6	OSMR	9606.ENSP00000385675	9606.ENSP00000274276	0	0	0	0	0.096	0	0.6	0.526	0.813
IL6	IL9	9606.ENSP00000385675	9606.ENSP00000274520	0	0	0	0	0	0	0	0.804	0.804
IL6	TNFRSF11B	9606.ENSP00000385675	9606.ENSP00000297350	0	0	0	0	0.07	0	0	0.722	0.73
IL6	IL7R	9606.ENSP00000385675	9606.ENSP00000306157	0	0	0	0	0.076	0	0.6	0.612	0.844
IL6	MET	9606.ENSP00000385675	9606.ENSP00000317272	0	0	0	0	0.07	0	0	0.889	0.893
IL6	MMP1	9606.ENSP00000385675	9606.ENSP00000322788	0	0	0	0	0.154	0	0.9	0.71	0.973
IL6	NOS2	9606.ENSP00000385675	9606.ENSP00000327251	0	0	0	0	0.063	0	0	0.784	0.789
IL6	SOCS1	9606.ENSP00000385675	9606.ENSP00000329418	0	0	0	0	0.091	0	0	0.712	0.727
IL6	SOCS3	9606.ENSP00000385675	9606.ENSP00000330341	0	0	0	0	0.209	0	0.9	0.814	0.984
IL6	UBE2C	9606.ENSP00000385675	9606.ENSP00000348838	0	0	0	0	0	0	0.9	0.134	0.909
IL6	MMP9	9606.ENSP00000385675	9606.ENSP00000361405	0	0	0	0	0.075	0	0.9	0.861	0.986
IL6	SDC1	9606.ENSP00000385675	9606.ENSP00000370542	0	0	0	0	0	0	0	0.796	0.796
IL6	SAA1	9606.ENSP00000385675	9606.ENSP00000384906	0	0	0	0	0.098	0	0.9	0.668	0.967
IL6	VEGFA	9606.ENSP00000385675	9606.ENSP00000478570	0	0	0	0	0.063	0	0.9	0.879	0.987
IL7R	IL9	9606.ENSP00000306157	9606.ENSP00000274520	0	0	0	0	0	0	0.6	0.601	0.833
IL7R	LCK	9606.ENSP00000306157	9606.ENSP00000337825	0	0	0	0	0.108	0.056	0	0.745	0.767
ISG20	OASL	9606.ENSP00000306565	9606.ENSP00000257570	0	0	0	0	0.541	0	0.9	0.641	0.982
ISG20	MX2	9606.ENSP00000306565	9606.ENSP00000333657	0	0	0	0	0.241	0	0.9	0.678	0.973
ISG20	OAS1	9606.ENSP00000306565	9606.ENSP00000388001	0	0	0	0	0.229	0	0.9	0.681	0.973
ISG20	MX1	9606.ENSP00000306565	9606.ENSP00000381601	0	0	0	0	0.327	0	0.9	0.698	0.977
ITGA5	LAMB1	9606.ENSP00000293379	9606.ENSP00000222399	0	0	0	0	0.107	0.151	0.6	0.398	0.793
ITGA5	THBS1	9606.ENSP00000293379	9606.ENSP00000260356	0	0	0	0	0.129	0.108	0.6	0.417	0.794
ITGA5	SPP1	9606.ENSP00000293379	9606.ENSP00000378517	0	0	0	0	0.063	0.213	0.6	0.421	0.806
ITGA5	PLAUR	9606.ENSP00000293379	9606.ENSP00000339328	0	0	0	0	0.17	0	0.9	0.346	0.941
ITGA5	PLAU	9606.ENSP00000293379	9606.ENSP00000361850	0	0	0	0	0.18	0	0.9	0.415	0.947
ITGA5	ITGB3	9606.ENSP00000293379	9606.ENSP00000452786	0	0	0	0	0.157	0.817	0.9	0.842	0.997
ITGB3	LAMB1	9606.ENSP00000452786	9606.ENSP00000222399	0	0	0	0	0.103	0.14	0.9	0.357	0.943
ITGB3	SERPINE1	9606.ENSP00000452786	9606.ENSP00000223095	0	0	0	0	0.126	0	0.9	0.578	0.959
ITGB3	WISP1	9606.ENSP00000452786	9606.ENSP00000250160	0	0	0	0	0.076	0	0	0.698	0.709
ITGB3	LGALS3	9606.ENSP00000452786	9606.ENSP00000254301	0	0	0	0	0.09	0	0	0.718	0.733
ITGB3	THBS1	9606.ENSP00000452786	9606.ENSP00000260356	0	0	0	0	0.114	0.486	0.9	0.44	0.971
ITGB3	PLAUR	9606.ENSP00000452786	9606.ENSP00000339328	0	0	0	0	0.083	0	0.9	0.617	0.961
ITGB3	VAV3	9606.ENSP00000452786	9606.ENSP00000359073	0	0	0	0	0.062	0	0.9	0.305	0.929
ITGB3	PLAU	9606.ENSP00000452786	9606.ENSP00000361850	0	0	0	0	0.095	0	0.9	0.295	0.93
ITGB3	SDC1	9606.ENSP00000452786	9606.ENSP00000370542	0	0	0	0	0.052	0.062	0.9	0.308	0.93
ITGB3	SPP1	9606.ENSP00000452786	9606.ENSP00000378517	0	0	0	0	0.049	0	0.9	0.469	0.945
ITGB3	TGFBI	9606.ENSP00000452786	9606.ENSP00000416330	0	0	0	0	0.152	0	0.9	0.224	0.928
ITGB3	VEGFA	9606.ENSP00000452786	9606.ENSP00000478570	0	0	0	0	0	0.141	0.9	0.47	0.95
KCNE1L	KCNE4	9606.ENSP00000361173	9606.ENSP00000281830	0	0	0	0	0	0	0	0.822	0.822
KIAA0101	NCAPG	9606.ENSP00000300035	9606.ENSP00000251496	0	0	0	0	0.855	0	0	0.16	0.873
KIAA0101	TROAP	9606.ENSP00000300035	9606.ENSP00000257909	0	0	0	0	0.595	0	0	0.348	0.725
KIAA0101	KIF23	9606.ENSP00000300035	9606.ENSP00000260363	0	0	0	0	0.787	0	0	0.157	0.813
KIAA0101	NDC80	9606.ENSP00000300035	9606.ENSP00000261597	0	0	0	0	0.918	0	0	0	0.918
KIAA0101	SGOL1	9606.ENSP00000300035	9606.ENSP00000263753	0	0	0	0	0.815	0	0	0.126	0.831
KIAA0101	NUF2	9606.ENSP00000300035	9606.ENSP00000271452	0	0	0	0	0.78	0	0	0.241	0.826
KIAA0101	SKA1	9606.ENSP00000300035	9606.ENSP00000285116	0	0	0	0	0.628	0	0	0.292	0.726
KIAA0101	MELK	9606.ENSP00000300035	9606.ENSP00000298048	0	0	0	0	0.868	0	0	0.391	0.916
KIAA0101	SHCBP1	9606.ENSP00000300035	9606.ENSP00000306473	0	0	0	0	0.773	0	0	0.181	0.806
KIAA0101	TK1	9606.ENSP00000300035	9606.ENSP00000301634	0	0	0	0	0.717	0	0	0.361	0.811
KIAA0101	NEK2	9606.ENSP00000300035	9606.ENSP00000355966	0	0	0	0	0.844	0	0	0.064	0.848
KIAA0101	KIF4A	9606.ENSP00000300035	9606.ENSP00000363524	0	0	0	0	0.828	0	0	0.153	0.849
KIAA0101	TYMS	9606.ENSP00000300035	9606.ENSP00000315644	0	0	0	0	0.834	0	0	0.301	0.879
KIAA0101	KIF2C	9606.ENSP00000300035	9606.ENSP00000361298	0	0	0	0	0.876	0	0	0.108	0.885
KIAA0101	PTTG1	9606.ENSP00000300035	9606.ENSP00000377536	0	0	0	0	0.84	0	0	0.321	0.887
KIAA0101	PBK	9606.ENSP00000300035	9606.ENSP00000428489	0	0	0	0	0.864	0	0	0.286	0.899
KIAA0101	TTK	9606.ENSP00000300035	9606.ENSP00000358813	0	0	0	0	0.89	0	0	0.312	0.921
KIAA0101	RRM2	9606.ENSP00000300035	9606.ENSP00000353770	0	0	0	0	0.917	0	0	0.325	0.941
KIAA0101	KIF20A	9606.ENSP00000300035	9606.ENSP00000378356	0	0	0	0	0.919	0	0	0.391	0.949
KIAA0101	UBE2C	9606.ENSP00000300035	9606.ENSP00000348838	0	0	0	0	0.937	0	0	0.316	0.955
KIAA0101	TOP2A	9606.ENSP00000300035	9606.ENSP00000411532	0	0	0	0	0.959	0	0	0.42	0.975
KIF18A	NCAPG	9606.ENSP00000263181	9606.ENSP00000251496	0	0	0	0	0.802	0.077	0	0.37	0.875
KIF18A	KIF23	9606.ENSP00000263181	9606.ENSP00000260363	0	0	0	0.586	0.752	0	0.5	0.713	0.908
KIF18A	NDC80	9606.ENSP00000263181	9606.ENSP00000261597	0	0	0	0	0.799	0.368	0	0.439	0.922
KIF18A	NEIL3	9606.ENSP00000263181	9606.ENSP00000264596	0	0	0	0	0.663	0	0	0.147	0.7
KIF18A	MELK	9606.ENSP00000263181	9606.ENSP00000298048	0	0	0	0	0.693	0.056	0	0.069	0.706
KIF18A	SGOL1	9606.ENSP00000263181	9606.ENSP00000263753	0	0	0	0	0.542	0.061	0	0.374	0.707
KIF18A	TOP2A	9606.ENSP00000263181	9606.ENSP00000411532	0	0	0	0	0.72	0	0	0.258	0.784
KIF18A	NEK2	9606.ENSP00000263181	9606.ENSP00000355966	0	0	0	0	0.683	0.058	0	0.434	0.816
KIF18A	PBK	9606.ENSP00000263181	9606.ENSP00000428489	0	0	0	0	0.79	0.104	0	0.254	0.848
KIF18A	KIF20A	9606.ENSP00000263181	9606.ENSP00000378356	0	0	0	0.565	0.715	0	0.5	0.563	0.886
KIF18A	KIF4A	9606.ENSP00000263181	9606.ENSP00000363524	0	0	0	0.664	0.737	0	0.5	0.747	0.896
KIF18A	TTK	9606.ENSP00000263181	9606.ENSP00000358813	0	0	0	0	0.823	0.15	0	0.444	0.909
KIF18A	NUF2	9606.ENSP00000263181	9606.ENSP00000271452	0	0	0	0	0.795	0.138	0	0.54	0.911
KIF18A	KIF2C	9606.ENSP00000263181	9606.ENSP00000361298	0	0	0	0.649	0.59	0	0.8	0.718	0.935
KIF20A	NCAPG	9606.ENSP00000378356	9606.ENSP00000251496	0	0	0	0	0.948	0.077	0	0.471	0.972
KIF20A	TROAP	9606.ENSP00000378356	9606.ENSP00000257909	0	0	0	0	0.899	0	0	0.31	0.927
KIF20A	KIF23	9606.ENSP00000378356	9606.ENSP00000260363	0	0	0	0.663	0.881	0.27	0.3	0.853	0.952
KIF20A	NDC80	9606.ENSP00000378356	9606.ENSP00000261597	0	0	0	0	0.931	0.181	0	0.298	0.957
KIF20A	SGOL1	9606.ENSP00000378356	9606.ENSP00000263753	0	0	0	0	0.862	0.061	0	0.324	0.905
KIF20A	NEIL3	9606.ENSP00000378356	9606.ENSP00000264596	0	0	0	0	0.688	0	0	0.123	0.715
KIF20A	NUF2	9606.ENSP00000378356	9606.ENSP00000271452	0	0	0	0	0.826	0.138	0	0.533	0.924
KIF20A	SKA1	9606.ENSP00000378356	9606.ENSP00000285116	0	0	0	0	0.745	0	0	0.404	0.841
KIF20A	MELK	9606.ENSP00000378356	9606.ENSP00000298048	0	0	0	0	0.909	0	0	0.427	0.945
KIF20A	TK1	9606.ENSP00000378356	9606.ENSP00000301634	0	0	0	0	0.601	0	0	0.341	0.726
KIF20A	SHCBP1	9606.ENSP00000378356	9606.ENSP00000306473	0	0	0	0	0.916	0.152	0	0.204	0.939
KIF20A	TYMS	9606.ENSP00000378356	9606.ENSP00000315644	0	0	0	0	0.802	0	0	0.235	0.842
KIF20A	TACC3	9606.ENSP00000378356	9606.ENSP00000326550	0	0	0	0	0.658	0.128	0	0.284	0.768
KIF20A	UBE2C	9606.ENSP00000378356	9606.ENSP00000348838	0	0	0	0	0.937	0.077	0	0.498	0.968
KIF20A	RRM2	9606.ENSP00000378356	9606.ENSP00000353770	0	0	0	0	0.928	0	0	0.398	0.955
KIF20A	NEK2	9606.ENSP00000378356	9606.ENSP00000355966	0	0	0	0	0.923	0.058	0	0.478	0.959
KIF20A	TTK	9606.ENSP00000378356	9606.ENSP00000358813	0	0	0	0	0.92	0.15	0	0.529	0.965
KIF20A	KIF2C	9606.ENSP00000378356	9606.ENSP00000361298	0	0	0	0.578	0.915	0	0.5	0.661	0.968
KIF20A	KIF4A	9606.ENSP00000378356	9606.ENSP00000363524	0	0	0	0.579	0.931	0.066	0.5	0.848	0.977
KIF20A	PTTG1	9606.ENSP00000378356	9606.ENSP00000377536	0	0	0	0	0.916	0	0	0.437	0.951
KIF20A	PBK	9606.ENSP00000378356	9606.ENSP00000428489	0	0	0	0	0.935	0.104	0	0.455	0.966
KIF20A	TOP2A	9606.ENSP00000378356	9606.ENSP00000411532	0	0	0	0	0.972	0.27	0	0.541	0.99
KIF23	NCAPG	9606.ENSP00000260363	9606.ENSP00000251496	0	0	0	0	0.894	0.077	0	0.412	0.937
KIF23	TACC3	9606.ENSP00000260363	9606.ENSP00000326550	0	0	0	0	0.711	0.128	0	0.238	0.791
KIF23	PTTG1	9606.ENSP00000260363	9606.ENSP00000377536	0	0	0	0	0.713	0	0	0.388	0.817
KIF23	RRM2	9606.ENSP00000260363	9606.ENSP00000353770	0	0	0	0	0.84	0	0	0.314	0.886
KIF23	UBE2C	9606.ENSP00000260363	9606.ENSP00000348838	0	0	0	0	0.817	0.077	0	0.429	0.895
KIF23	NUF2	9606.ENSP00000260363	9606.ENSP00000271452	0	0	0	0	0.803	0.138	0	0.43	0.895
KIF23	NEK2	9606.ENSP00000260363	9606.ENSP00000355966	0	0	0	0	0.848	0.058	0	0.385	0.904
KIF23	KIF2C	9606.ENSP00000260363	9606.ENSP00000361298	0	0	0	0.574	0.795	0	0.5	0.69	0.924
KIF23	PBK	9606.ENSP00000260363	9606.ENSP00000428489	0	0	0	0	0.901	0.104	0	0.277	0.93
KIF23	TTK	9606.ENSP00000260363	9606.ENSP00000358813	0	0	0	0	0.895	0.15	0	0.486	0.95
KIF23	SHCBP1	9606.ENSP00000260363	9606.ENSP00000306473	0	0	0	0	0.714	0.773	0	0.375	0.956
KIF23	MELK	9606.ENSP00000260363	9606.ENSP00000298048	0	0	0	0	0.943	0	0	0.325	0.959
KIF23	NDC80	9606.ENSP00000260363	9606.ENSP00000261597	0	0	0	0	0.96	0.181	0	0.223	0.972
KIF23	TOP2A	9606.ENSP00000260363	9606.ENSP00000411532	0	0	0	0	0.951	0.27	0	0.501	0.98
KIF23	KIF4A	9606.ENSP00000260363	9606.ENSP00000363524	0	0	0	0.583	0.945	0.066	0.5	0.912	0.982
KIF2C	MYBL2	9606.ENSP00000361298	9606.ENSP00000217026	0	0	0	0	0.599	0	0	0.324	0.717
KIF2C	NCAPG	9606.ENSP00000361298	9606.ENSP00000251496	0	0	0	0	0.883	0.077	0	0.467	0.937
KIF2C	TROAP	9606.ENSP00000361298	9606.ENSP00000257909	0	0	0	0	0.926	0	0	0.258	0.943
KIF2C	NDC80	9606.ENSP00000361298	9606.ENSP00000261597	0	0	0	0	0.917	0.181	0	0.7	0.977
KIF2C	SGOL1	9606.ENSP00000361298	9606.ENSP00000263753	0	0	0	0	0.855	0.261	0	0.603	0.954
KIF2C	NUF2	9606.ENSP00000361298	9606.ENSP00000271452	0	0	0	0	0.755	0.138	0	0.614	0.911
KIF2C	SKA1	9606.ENSP00000361298	9606.ENSP00000285116	0	0	0	0	0.622	0	0	0.604	0.844
KIF2C	MELK	9606.ENSP00000361298	9606.ENSP00000298048	0	0	0	0	0.847	0	0	0.458	0.913
KIF2C	SHCBP1	9606.ENSP00000361298	9606.ENSP00000306473	0	0	0	0	0.683	0.075	0	0.188	0.741
KIF2C	TYMS	9606.ENSP00000361298	9606.ENSP00000315644	0	0	0	0	0.777	0	0	0.232	0.821
KIF2C	TACC3	9606.ENSP00000361298	9606.ENSP00000326550	0	0	0	0	0.671	0.06	0	0.498	0.831
KIF2C	UBE2C	9606.ENSP00000361298	9606.ENSP00000348838	0	0	0	0	0.919	0.077	0	0.504	0.96
KIF2C	RRM2	9606.ENSP00000361298	9606.ENSP00000353770	0	0	0	0	0.915	0	0	0.395	0.946
KIF2C	NEK2	9606.ENSP00000361298	9606.ENSP00000355966	0	0	0	0	0.895	0.058	0	0.519	0.948
KIF2C	TTK	9606.ENSP00000361298	9606.ENSP00000358813	0	0	0	0	0.911	0.15	0	0.532	0.961
KIF2C	ORC1	9606.ENSP00000361298	9606.ENSP00000360623	0	0	0	0	0.714	0.057	0	0.134	0.746
KIF2C	PTTG1	9606.ENSP00000361298	9606.ENSP00000377536	0	0	0	0	0.87	0	0	0.474	0.929
KIF2C	PBK	9606.ENSP00000361298	9606.ENSP00000428489	0	0	0	0	0.913	0.104	0	0.359	0.945
KIF2C	KIF4A	9606.ENSP00000361298	9606.ENSP00000363524	0	0	0	0.666	0.891	0.056	0.5	0.789	0.958
KIF2C	TOP2A	9606.ENSP00000361298	9606.ENSP00000411532	0	0	0	0	0.941	0	0	0.478	0.968
KIF4A	NCAPG	9606.ENSP00000363524	9606.ENSP00000251496	0	0	0	0	0.887	0.077	0	0.525	0.946
KIF4A	TROAP	9606.ENSP00000363524	9606.ENSP00000257909	0	0	0	0	0.823	0	0	0.26	0.863
KIF4A	NDC80	9606.ENSP00000363524	9606.ENSP00000261597	0	0	0	0	0.888	0.181	0	0.388	0.939
KIF4A	SGOL1	9606.ENSP00000363524	9606.ENSP00000263753	0	0	0	0	0.638	0.061	0	0.345	0.758
KIF4A	NUF2	9606.ENSP00000363524	9606.ENSP00000271452	0	0	0	0	0.817	0.138	0	0.413	0.899
KIF4A	SKA1	9606.ENSP00000363524	9606.ENSP00000285116	0	0	0	0	0.63	0	0	0.431	0.78
KIF4A	MELK	9606.ENSP00000363524	9606.ENSP00000298048	0	0	0	0	0.926	0	0	0.414	0.955
KIF4A	SHCBP1	9606.ENSP00000363524	9606.ENSP00000306473	0	0	0	0	0.801	0.075	0	0.366	0.873
KIF4A	UBE2C	9606.ENSP00000363524	9606.ENSP00000348838	0	0	0	0	0.903	0.077	0	0.453	0.947
KIF4A	RRM2	9606.ENSP00000363524	9606.ENSP00000353770	0	0	0	0	0.811	0	0	0.346	0.871
KIF4A	NEK2	9606.ENSP00000363524	9606.ENSP00000355966	0	0	0	0	0.897	0.058	0	0.394	0.936
KIF4A	TTK	9606.ENSP00000363524	9606.ENSP00000358813	0	0	0	0	0.864	0.15	0	0.392	0.923
KIF4A	ORC1	9606.ENSP00000363524	9606.ENSP00000360623	0	0	0	0	0.635	0.057	0	0.233	0.713
KIF4A	PTTG1	9606.ENSP00000363524	9606.ENSP00000377536	0	0	0	0	0.789	0	0	0.55	0.901
KIF4A	PBK	9606.ENSP00000363524	9606.ENSP00000428489	0	0	0	0	0.896	0.104	0	0.378	0.937
KIF4A	TOP2A	9606.ENSP00000363524	9606.ENSP00000411532	0	0	0	0	0.971	0	0	0.721	0.991
LAMB1	MET	9606.ENSP00000222399	9606.ENSP00000317272	0	0	0	0	0.139	0	0.9	0	0.91
LAMB1	MMP14	9606.ENSP00000222399	9606.ENSP00000308208	0	0	0	0	0.162	0	0.9	0.181	0.925
LCK	SOCS1	9606.ENSP00000337825	9606.ENSP00000329418	0	0	0	0	0.062	0.317	0.9	0.29	0.948
LCK	SOCS3	9606.ENSP00000337825	9606.ENSP00000330341	0	0	0	0	0.062	0.317	0.9	0.27	0.946
LCK	PDCD1LG2	9606.ENSP00000337825	9606.ENSP00000380855	0	0	0	0	0.062	0	0.6	0.293	0.711
LCK	SOCS2	9606.ENSP00000337825	9606.ENSP00000481249	0	0	0	0	0	0.317	0.9	0.246	0.944
LCK	SH2D2A	9606.ENSP00000337825	9606.ENSP00000376123	0	0	0	0	0.123	0.684	0	0.977	0.993
LDHA	SLC16A3	9606.ENSP00000445175	9606.ENSP00000463978	0	0	0	0	0.081	0	0	0.787	0.796
LGALS3	SH2D2A	9606.ENSP00000254301	9606.ENSP00000376123	0	0	0	0	0	0	0	0.704	0.704
LGALS3	MMP9	9606.ENSP00000254301	9606.ENSP00000361405	0	0	0	0	0.072	0	0	0.72	0.729
LGALS3	RUNX1	9606.ENSP00000254301	9606.ENSP00000300305	0	0	0	0	0.074	0	0.9	0	0.903
LIF	TIMP1	9606.ENSP00000249075	9606.ENSP00000218388	0	0	0	0	0.098	0	0.9	0.335	0.934
LIF	OSMR	9606.ENSP00000249075	9606.ENSP00000274276	0	0	0	0	0.098	0.058	0.6	0.556	0.828
LIF	SAA1	9606.ENSP00000249075	9606.ENSP00000384906	0	0	0	0	0.065	0	0.9	0.067	0.905
LIF	MMP1	9606.ENSP00000249075	9606.ENSP00000322788	0	0	0	0	0.139	0	0.9	0.208	0.925
LIF	MMP9	9606.ENSP00000249075	9606.ENSP00000361405	0	0	0	0	0.062	0	0.9	0.338	0.932
LIF	VEGFA	9606.ENSP00000249075	9606.ENSP00000478570	0	0	0	0	0.093	0	0.9	0.598	0.96
LOX	PCOLCE	9606.ENSP00000231004	9606.ENSP00000223061	0	0	0	0	0.241	0	0.9	0.294	0.941
LOX	SNAI1	9606.ENSP00000231004	9606.ENSP00000244050	0	0	0	0	0.086	0	0	0.716	0.729
LOX	POSTN	9606.ENSP00000231004	9606.ENSP00000369071	0	0	0	0	0.428	0	0	0.608	0.766
LOX	LOXL4	9606.ENSP00000231004	9606.ENSP00000260702	0	0	0	0.817	0.119	0	0.9	0.8	0.921
LOX	LOXL1	9606.ENSP00000231004	9606.ENSP00000261921	0	0	0	0.915	0.328	0	0.9	0.824	0.934
LOX	MFAP5	9606.ENSP00000231004	9606.ENSP00000352455	0	0	0	0	0.094	0	0.9	0.391	0.94
LOX	LOXL2	9606.ENSP00000231004	9606.ENSP00000373783	0	0	0	0.817	0.252	0.234	0.9	0.84	0.947
LOX	MFAP2	9606.ENSP00000231004	9606.ENSP00000364685	0	0	0	0	0.127	0	0.9	0.465	0.949
LOXL1	PCOLCE	9606.ENSP00000261921	9606.ENSP00000223061	0	0	0	0	0.37	0	0.9	0.203	0.945
LOXL1	LOXL4	9606.ENSP00000261921	9606.ENSP00000260702	0	0	0	0.731	0.117	0	0.9	0.942	0.931
LOXL1	MFAP5	9606.ENSP00000261921	9606.ENSP00000352455	0	0	0	0	0.085	0	0.9	0.337	0.934
LOXL1	LOXL2	9606.ENSP00000261921	9606.ENSP00000373783	0	0	0	0.732	0.228	0	0.9	0.855	0.937
LOXL1	MFAP2	9606.ENSP00000261921	9606.ENSP00000364685	0	0	0	0	0.23	0	0.9	0.507	0.958
LOXL2	PCOLCE	9606.ENSP00000373783	9606.ENSP00000223061	0	0	0	0	0.171	0	0.9	0.202	0.928
LOXL2	SNAI1	9606.ENSP00000373783	9606.ENSP00000244050	0	0	0	0	0.073	0	0	0.986	0.986
LOXL2	LOXL4	9606.ENSP00000373783	9606.ENSP00000260702	0	0	0	0.955	0.076	0.547	0.9	0.873	0.956
LOXL2	MFAP5	9606.ENSP00000373783	9606.ENSP00000352455	0	0	0	0	0.062	0	0.9	0.112	0.909
LOXL2	MFAP2	9606.ENSP00000373783	9606.ENSP00000364685	0	0	0	0	0.152	0	0.9	0.202	0.926
LOXL4	PCOLCE	9606.ENSP00000260702	9606.ENSP00000223061	0	0	0	0	0.096	0	0.9	0	0.905
LOXL4	MFAP5	9606.ENSP00000260702	9606.ENSP00000352455	0	0	0	0	0.062	0	0.9	0.164	0.914
LOXL4	MFAP2	9606.ENSP00000260702	9606.ENSP00000364685	0	0	0	0	0.06	0	0.9	0.209	0.919
LRRC61	ZBED6CL	9606.ENSP00000352642	9606.ENSP00000343242	0	0	0	0	0.333	0	0	0.733	0.814
LTF	LYZ	9606.ENSP00000231751	9606.ENSP00000261267	0	0	0	0	0.127	0.27	0.5	0.652	0.874
LUM	POSTN	9606.ENSP00000266718	9606.ENSP00000369071	0	0	0	0	0.591	0	0	0.558	0.811
LUM	MMP14	9606.ENSP00000266718	9606.ENSP00000308208	0	0	0	0	0.214	0.619	0	0.427	0.813
LUM	TGFB2	9606.ENSP00000266718	9606.ENSP00000355896	0	0	0	0	0.116	0.056	0.6	0.554	0.831
MELK	MYBL2	9606.ENSP00000298048	9606.ENSP00000217026	0	0	0	0	0.562	0.066	0	0.641	0.84
MELK	NCAPG	9606.ENSP00000298048	9606.ENSP00000251496	0	0	0	0	0.925	0	0	0.557	0.965
MELK	TROAP	9606.ENSP00000298048	9606.ENSP00000257909	0	0	0	0	0.732	0	0	0.124	0.755
MELK	NDC80	9606.ENSP00000298048	9606.ENSP00000261597	0	0	0	0	0.933	0	0	0.141	0.94
MELK	SGOL1	9606.ENSP00000298048	9606.ENSP00000263753	0	0	0	0	0.831	0.058	0	0.287	0.877
MELK	NUF2	9606.ENSP00000298048	9606.ENSP00000271452	0	0	0	0	0.87	0.069	0	0.381	0.918
MELK	SKA1	9606.ENSP00000298048	9606.ENSP00000285116	0	0	0	0	0.759	0	0	0.286	0.821
MELK	TK1	9606.ENSP00000298048	9606.ENSP00000301634	0	0	0	0	0.623	0	0	0.298	0.724
MELK	TYMS	9606.ENSP00000298048	9606.ENSP00000315644	0	0	0	0	0.821	0	0	0.193	0.849
MELK	SHCBP1	9606.ENSP00000298048	9606.ENSP00000306473	0	0	0	0	0.832	0	0	0.139	0.849
MELK	NEK2	9606.ENSP00000298048	9606.ENSP00000355966	0	0	0	0.621	0.832	0.056	0	0.484	0.863
MELK	PTTG1	9606.ENSP00000298048	9606.ENSP00000377536	0	0	0	0	0.857	0	0	0.345	0.902
MELK	TTK	9606.ENSP00000298048	9606.ENSP00000358813	0	0	0	0.571	0.914	0.056	0	0.505	0.933
MELK	UBE2C	9606.ENSP00000298048	9606.ENSP00000348838	0	0	0	0	0.891	0.135	0	0.502	0.949
MELK	RRM2	9606.ENSP00000298048	9606.ENSP00000353770	0	0	0	0	0.925	0.059	0	0.427	0.956
MELK	TOP2A	9606.ENSP00000298048	9606.ENSP00000411532	0	0	0	0	0.935	0.056	0	0.56	0.97
MELK	PBK	9606.ENSP00000298048	9606.ENSP00000428489	0	0	0	0	0.952	0.136	0	0.56	0.98
MET	VEGFA	9606.ENSP00000317272	9606.ENSP00000478570	0	0	0	0	0.067	0	0.6	0.769	0.906
MET	SDC1	9606.ENSP00000317272	9606.ENSP00000370542	0	0	0	0	0.138	0	0.9	0.386	0.942
MET	PLAUR	9606.ENSP00000317272	9606.ENSP00000339328	0	0	0	0	0.062	0	0.9	0.459	0.944
MET	S100A8	9606.ENSP00000317272	9606.ENSP00000357722	0	0	0	0	0	0	0	0.987	0.987
METTL1	TSPAN31	9606.ENSP00000314441	9606.ENSP00000257910	0	0	0	0	0.082	0	0	0.707	0.719
METTL1	METTL21B	9606.ENSP00000314441	9606.ENSP00000300209	0	0	0	0	0.152	0	0	0.69	0.726
MFAP2	MFAP5	9606.ENSP00000364685	9606.ENSP00000352455	0	0	0	0.779	0.073	0	0.9	0.926	0.923
MGP	SPP1	9606.ENSP00000228938	9606.ENSP00000378517	0	0	0	0	0.062	0	0	0.743	0.748
MMP1	MMP11	9606.ENSP00000322788	9606.ENSP00000215743	0	0	0	0.81	0	0	0.9	0.7	0.913
MMP1	TIMP1	9606.ENSP00000322788	9606.ENSP00000218388	0	0	0	0	0.157	0.869	0.9	0.989	0.999
MMP1	MMP7	9606.ENSP00000322788	9606.ENSP00000260227	0	0	0.265	0.919	0.062	0.213	0.9	0.806	0.926
MMP1	SDC1	9606.ENSP00000322788	9606.ENSP00000370542	0	0	0	0	0.088	0	0.9	0.262	0.926
MMP1	SAA1	9606.ENSP00000322788	9606.ENSP00000384906	0	0	0	0	0.063	0	0.9	0.403	0.939
MMP1	MMP9	9606.ENSP00000322788	9606.ENSP00000361405	0	0	0	0.75	0.518	0	0.9	0.901	0.961
MMP1	VEGFA	9606.ENSP00000322788	9606.ENSP00000478570	0	0	0	0	0.069	0	0.9	0.683	0.967
MMP11	MMP7	9606.ENSP00000215743	9606.ENSP00000260227	0	0	0.2	0.813	0	0	0.65	0.681	0.703
MMP11	TIMP1	9606.ENSP00000215743	9606.ENSP00000218388	0	0	0	0	0.062	0.18	0	0.679	0.732
MMP12	TIMP1	9606.ENSP00000458585	9606.ENSP00000218388	0	0	0	0	0.085	0.18	0	0.761	0.805
MMP12	PLAUR	9606.ENSP00000458585	9606.ENSP00000339328	0	0	0	0	0.065	0.213	0.9	0.393	0.949
MMP12	MMP9	9606.ENSP00000458585	9606.ENSP00000361405	0	0	0	0.732	0.512	0	0.3	0.855	0.724
MMP13	TIMP1	9606.ENSP00000260302	9606.ENSP00000218388	0	0	0	0	0.063	0.18	0	0.92	0.934
MMP13	MMP14	9606.ENSP00000260302	9606.ENSP00000308208	0	0	0.241	0.854	0.062	0.213	0.9	0.798	0.931
MMP14	TIMP1	9606.ENSP00000308208	9606.ENSP00000218388	0	0	0	0	0.159	0.977	0	0.986	0.999
MMP14	TGFBI	9606.ENSP00000308208	9606.ENSP00000416330	0	0	0	0	0.352	0.151	0	0.717	0.831
MMP7	TIMP1	9606.ENSP00000260227	9606.ENSP00000218388	0	0	0	0	0	0.18	0	0.924	0.936
MMP7	SDC1	9606.ENSP00000260227	9606.ENSP00000370542	0	0	0	0	0	0	0.9	0.536	0.951
MMP7	SPP1	9606.ENSP00000260227	9606.ENSP00000378517	0	0	0	0	0.062	0.213	0.9	0.618	0.968
MMP9	TIMP1	9606.ENSP00000361405	9606.ENSP00000218388	0	0	0	0	0.063	0.522	0.8	0.99	0.999
MMP9	PLAT	9606.ENSP00000361405	9606.ENSP00000220809	0	0	0	0	0	0	0	0.73	0.73
MMP9	SERPINE1	9606.ENSP00000361405	9606.ENSP00000223095	0	0	0	0	0.062	0.056	0	0.757	0.767
MMP9	SNAI1	9606.ENSP00000361405	9606.ENSP00000244050	0	0	0	0	0	0	0	0.753	0.753
MMP9	THBS1	9606.ENSP00000361405	9606.ENSP00000260356	0	0	0	0	0.063	0.462	0.8	0.691	0.964
MMP9	PLAUR	9606.ENSP00000361405	9606.ENSP00000339328	0	0	0	0	0.111	0	0	0.774	0.79
MMP9	SPP1	9606.ENSP00000361405	9606.ENSP00000378517	0	0	0	0	0.11	0	0	0.694	0.717
MMP9	PLAU	9606.ENSP00000361405	9606.ENSP00000361850	0	0	0	0	0.076	0	0	0.728	0.738
MMP9	SAA1	9606.ENSP00000361405	9606.ENSP00000384906	0	0	0	0	0.062	0	0.9	0.418	0.94
MMP9	SDC1	9606.ENSP00000361405	9606.ENSP00000370542	0	0	0	0	0	0	0.9	0.851	0.984
MMP9	VEGFA	9606.ENSP00000361405	9606.ENSP00000478570	0	0	0	0	0	0	0.9	0.879	0.987
MRC2	PLAU	9606.ENSP00000307513	9606.ENSP00000361850	0	0	0	0	0.143	0	0	0.789	0.811
MRC2	PLAUR	9606.ENSP00000307513	9606.ENSP00000339328	0	0	0	0	0	0	0	0.841	0.841
MX1	OASL	9606.ENSP00000381601	9606.ENSP00000257570	0	0	0	0	0.962	0.149	0.9	0.794	0.999
MX1	MX2	9606.ENSP00000381601	9606.ENSP00000333657	0	0	0	0.961	0.784	0	0.8	0.903	0.956
MX1	OAS1	9606.ENSP00000381601	9606.ENSP00000388001	0	0	0	0	0.879	0	0.9	0.857	0.998
MX2	OASL	9606.ENSP00000333657	9606.ENSP00000257570	0	0	0	0	0.919	0.149	0.9	0.73	0.997
MX2	OAS1	9606.ENSP00000333657	9606.ENSP00000388001	0	0	0	0	0.712	0	0.9	0.71	0.99
MYBL2	TK1	9606.ENSP00000217026	9606.ENSP00000301634	0	0	0	0	0.564	0	0	0.36	0.709
MYBL2	TOP2A	9606.ENSP00000217026	9606.ENSP00000411532	0	0	0	0	0.574	0.066	0	0.456	0.765
MYBL2	NCAPG	9606.ENSP00000217026	9606.ENSP00000251496	0	0	0	0	0.68	0	0	0.341	0.78
MYBL2	RRM2	9606.ENSP00000217026	9606.ENSP00000353770	0	0	0	0	0.587	0	0	0.574	0.816
MYBL2	UBE2C	9606.ENSP00000217026	9606.ENSP00000348838	0	0	0	0	0.661	0.057	0	0.545	0.842
NAMPT	SOD2	9606.ENSP00000222553	9606.ENSP00000446252	0	0	0	0	0.539	0	0	0.406	0.714
NAMPT	RARRES2	9606.ENSP00000222553	9606.ENSP00000418009	0	0	0	0	0	0	0	0.748	0.748
NAMPT	NNMT	9606.ENSP00000222553	9606.ENSP00000441434	0	0	0	0	0	0	0.9	0.527	0.95
NCAPG	ORC1	9606.ENSP00000251496	9606.ENSP00000360623	0	0	0	0	0.709	0	0	0.156	0.744
NCAPG	SPC24	9606.ENSP00000251496	9606.ENSP00000465075	0	0	0	0	0.68	0	0	0.274	0.757
NCAPG	SGOL1	9606.ENSP00000251496	9606.ENSP00000263753	0	0	0	0	0.668	0	0	0.325	0.766
NCAPG	NEIL3	9606.ENSP00000251496	9606.ENSP00000264596	0	0	0	0	0.788	0	0	0.065	0.794
NCAPG	TROAP	9606.ENSP00000251496	9606.ENSP00000257909	0	0	0	0	0.747	0	0	0.266	0.806
NCAPG	SKA1	9606.ENSP00000251496	9606.ENSP00000285116	0	0	0	0	0.759	0	0	0.293	0.822
NCAPG	NEK2	9606.ENSP00000251496	9606.ENSP00000355966	0	0	0	0	0.814	0	0	0.363	0.876
NCAPG	UBE2C	9606.ENSP00000251496	9606.ENSP00000348838	0	0	0	0	0.865	0.067	0	0.421	0.921
NCAPG	TACC3	9606.ENSP00000251496	9606.ENSP00000326550	0	0	0	0	0.936	0	0	0.049	0.936
NCAPG	PTTG1	9606.ENSP00000251496	9606.ENSP00000377536	0	0	0	0	0.902	0	0	0.452	0.944
NCAPG	SHCBP1	9606.ENSP00000251496	9606.ENSP00000306473	0	0	0	0	0.947	0	0	0.066	0.948
NCAPG	RRM2	9606.ENSP00000251496	9606.ENSP00000353770	0	0	0	0	0.925	0	0	0.431	0.955
NCAPG	TYMS	9606.ENSP00000251496	9606.ENSP00000315644	0	0	0	0	0.951	0	0	0.231	0.96
NCAPG	PBK	9606.ENSP00000251496	9606.ENSP00000428489	0	0	0	0	0.936	0	0	0.456	0.963
NCAPG	NUF2	9606.ENSP00000251496	9606.ENSP00000271452	0	0	0	0	0.953	0	0	0.455	0.973
NCAPG	TOP2A	9606.ENSP00000251496	9606.ENSP00000411532	0	0	0	0	0.968	0.104	0	0.681	0.99
NCAPG	NDC80	9606.ENSP00000251496	9606.ENSP00000261597	0	0	0	0	0.98	0	0	0.551	0.991
NCAPG	TTK	9606.ENSP00000251496	9606.ENSP00000358813	0	0	0	0	0.987	0	0	0.47	0.993
NDC80	TROAP	9606.ENSP00000261597	9606.ENSP00000257909	0	0	0	0	0.778	0	0	0.085	0.788
NDC80	ORC1	9606.ENSP00000261597	9606.ENSP00000360623	0	0	0	0	0.723	0	0	0.095	0.738
NDC80	SHCBP1	9606.ENSP00000261597	9606.ENSP00000306473	0	0	0	0	0.826	0	0	0	0.826
NDC80	TACC3	9606.ENSP00000261597	9606.ENSP00000326550	0	0	0	0	0.877	0	0	0.217	0.9
NDC80	PTTG1	9606.ENSP00000261597	9606.ENSP00000377536	0	0	0	0	0.819	0	0	0.528	0.911
NDC80	UBE2C	9606.ENSP00000261597	9606.ENSP00000348838	0	0	0	0	0.885	0.063	0	0.38	0.927
NDC80	RRM2	9606.ENSP00000261597	9606.ENSP00000353770	0	0	0	0	0.906	0	0	0.293	0.931
NDC80	SGOL1	9606.ENSP00000261597	9606.ENSP00000263753	0	0	0	0	0.853	0	0	0.56	0.933
NDC80	TYMS	9606.ENSP00000261597	9606.ENSP00000315644	0	0	0	0	0.921	0	0	0.282	0.941
NDC80	PBK	9606.ENSP00000261597	9606.ENSP00000428489	0	0	0	0	0.963	0	0	0.124	0.967
NDC80	TOP2A	9606.ENSP00000261597	9606.ENSP00000411532	0	0	0	0	0.964	0.177	0	0.232	0.975
NDC80	SKA1	9606.ENSP00000261597	9606.ENSP00000285116	0	0	0	0	0.871	0.464	0.72	0.753	0.994
NDC80	TTK	9606.ENSP00000261597	9606.ENSP00000358813	0	0	0	0	0.983	0.771	0	0.67	0.998
NDC80	SPC24	9606.ENSP00000261597	9606.ENSP00000465075	0	0	0	0	0.592	0.918	0.9	0.988	0.999
NDC80	NUF2	9606.ENSP00000261597	9606.ENSP00000271452	0	0	0	0	0.964	0.991	0.9	0.994	0.999
NDC80	NEK2	9606.ENSP00000261597	9606.ENSP00000355966	0	0	0	0	0.955	0.491	0	0.97	0.999
NDST4	SDC1	9606.ENSP00000264363	9606.ENSP00000370542	0	0	0	0	0	0	0.9	0.263	0.923
NEIL3	PBK	9606.ENSP00000264596	9606.ENSP00000428489	0	0	0	0	0.704	0	0	0.106	0.724
NEIL3	TTK	9606.ENSP00000264596	9606.ENSP00000358813	0	0	0	0	0.739	0	0	0.083	0.751
NEIL3	TOP2A	9606.ENSP00000264596	9606.ENSP00000411532	0.159	0	0	0	0.602	0	0	0.825	0.936
NEK2	TROAP	9606.ENSP00000355966	9606.ENSP00000257909	0	0	0	0	0.764	0	0	0.148	0.79
NEK2	SGOL1	9606.ENSP00000355966	9606.ENSP00000263753	0	0	0	0	0.854	0	0	0.423	0.912
NEK2	NUF2	9606.ENSP00000355966	9606.ENSP00000271452	0	0	0	0	0.75	0	0	0.517	0.874
NEK2	SKA1	9606.ENSP00000355966	9606.ENSP00000285116	0	0	0	0	0.747	0	0	0.261	0.805
NEK2	SHCBP1	9606.ENSP00000355966	9606.ENSP00000306473	0	0	0	0	0.836	0	0	0.095	0.846
NEK2	UBE2C	9606.ENSP00000355966	9606.ENSP00000348838	0	0	0	0	0.825	0.123	0.6	0.557	0.969
NEK2	RRM2	9606.ENSP00000355966	9606.ENSP00000353770	0	0	0	0	0.879	0	0	0.403	0.924
NEK2	PTTG1	9606.ENSP00000355966	9606.ENSP00000377536	0	0	0	0	0.74	0	0	0.603	0.892
NEK2	TTK	9606.ENSP00000355966	9606.ENSP00000358813	0	0	0	0.597	0.878	0	0	0.603	0.907
NEK2	PBK	9606.ENSP00000355966	9606.ENSP00000428489	0	0	0	0.575	0.886	0.127	0	0.528	0.919
NEK2	TOP2A	9606.ENSP00000355966	9606.ENSP00000411532	0	0	0	0	0.919	0	0	0.517	0.959
NKX2-5	TBX1	9606.ENSP00000327758	9606.ENSP00000331791	0	0	0	0	0.063	0.212	0	0.736	0.789
NOS2	VIM	9606.ENSP00000327251	9606.ENSP00000446007	0	0	0	0	0.062	0	0.9	0.096	0.907
NOS2	SOCS3	9606.ENSP00000327251	9606.ENSP00000330341	0	0	0	0	0.065	0	0.9	0.391	0.938
NTS	TRH	9606.ENSP00000256010	9606.ENSP00000303452	0	0	0	0	0.054	0	0.5	0.811	0.903
NUF2	SGOL1	9606.ENSP00000271452	9606.ENSP00000263753	0	0	0	0	0.665	0	0	0.483	0.819
NUF2	SHCBP1	9606.ENSP00000271452	9606.ENSP00000306473	0	0	0	0	0.762	0	0	0	0.762
NUF2	TACC3	9606.ENSP00000271452	9606.ENSP00000326550	0	0	0	0	0.779	0	0	0.227	0.822
NUF2	RRM2	9606.ENSP00000271452	9606.ENSP00000353770	0	0	0	0	0.736	0	0	0.406	0.836
NUF2	SKA1	9606.ENSP00000271452	9606.ENSP00000285116	0	0	0	0	0.679	0	0	0.614	0.871
NUF2	PTTG1	9606.ENSP00000271452	9606.ENSP00000377536	0	0	0	0	0.806	0	0	0.518	0.902
NUF2	UBE2C	9606.ENSP00000271452	9606.ENSP00000348838	0	0	0	0	0.817	0	0	0.504	0.905
NUF2	TYMS	9606.ENSP00000271452	9606.ENSP00000315644	0	0	0	0	0.821	0	0	0.596	0.924
NUF2	TOP2A	9606.ENSP00000271452	9606.ENSP00000411532	0	0	0	0	0.855	0.056	0	0.538	0.931
NUF2	PBK	9606.ENSP00000271452	9606.ENSP00000428489	0	0	0	0	0.919	0	0	0.413	0.95
NUF2	TTK	9606.ENSP00000271452	9606.ENSP00000358813	0	0	0	0	0.927	0.496	0	0.781	0.991
NUF2	SPC24	9606.ENSP00000271452	9606.ENSP00000465075	0	0	0	0	0.374	0.887	0.9	0.994	0.999
OAS1	OASL	9606.ENSP00000388001	9606.ENSP00000257570	0	0	0	0.842	0.785	0	0	0.764	0.81
ORC1	TYMS	9606.ENSP00000360623	9606.ENSP00000315644	0	0	0	0	0.602	0	0	0.327	0.72
ORC1	RRM2	9606.ENSP00000360623	9606.ENSP00000353770	0	0	0	0	0.669	0	0	0.206	0.726
ORC1	TTK	9606.ENSP00000360623	9606.ENSP00000358813	0	0	0	0	0.764	0	0	0.198	0.803
PBK	TROAP	9606.ENSP00000428489	9606.ENSP00000257909	0	0	0	0	0.695	0	0	0.231	0.756
PBK	SGOL1	9606.ENSP00000428489	9606.ENSP00000263753	0	0	0	0	0.828	0.077	0	0.26	0.872
PBK	TK1	9606.ENSP00000428489	9606.ENSP00000301634	0	0	0	0	0.649	0	0	0.323	0.752
PBK	SHCBP1	9606.ENSP00000428489	9606.ENSP00000306473	0	0	0	0	0.81	0	0	0.241	0.85
PBK	TYMS	9606.ENSP00000428489	9606.ENSP00000315644	0	0	0	0	0.821	0	0	0.243	0.858
PBK	UBE2C	9606.ENSP00000428489	9606.ENSP00000348838	0	0	0	0	0.934	0.067	0	0.341	0.955
PBK	RRM2	9606.ENSP00000428489	9606.ENSP00000353770	0	0	0	0	0.936	0	0	0.393	0.959
PBK	TTK	9606.ENSP00000428489	9606.ENSP00000358813	0	0	0	0	0.947	0	0	0.537	0.974
PBK	PTTG1	9606.ENSP00000428489	9606.ENSP00000377536	0	0	0	0	0.908	0	0	0.374	0.94
PBK	TOP2A	9606.ENSP00000428489	9606.ENSP00000411532	0	0	0	0	0.982	0	0	0.556	0.992
PDGFD	PLAT	9606.ENSP00000376865	9606.ENSP00000220809	0	0	0	0	0.062	0	0.9	0.21	0.919
PDGFD	PLAUR	9606.ENSP00000376865	9606.ENSP00000339328	0	0	0	0	0	0	0.9	0.19	0.915
PDGFD	PLAU	9606.ENSP00000376865	9606.ENSP00000361850	0	0	0	0	0	0	0.9	0.21	0.917
PLAT	PLAUR	9606.ENSP00000220809	9606.ENSP00000339328	0	0	0	0	0	0.058	0	0.895	0.897
PLAT	SERPINE1	9606.ENSP00000220809	9606.ENSP00000223095	0	0	0	0	0.147	0.937	0.8	0.99	0.999
PLAU	TIMP1	9606.ENSP00000361850	9606.ENSP00000218388	0	0	0	0	0.158	0	0	0.677	0.716
PLAU	SERPINE1	9606.ENSP00000361850	9606.ENSP00000223095	0	0	0	0	0.214	0.976	0.9	0.989	0.999
PLAU	SERPINA5	9606.ENSP00000361850	9606.ENSP00000333203	0	0	0	0	0	0.704	0	0.435	0.825
PLAU	PLAUR	9606.ENSP00000361850	9606.ENSP00000339328	0	0	0	0	0.221	0.975	0.9	0.989	0.999
PLAUR	TIMP1	9606.ENSP00000339328	9606.ENSP00000218388	0	0	0	0	0.162	0	0	0.751	0.782
PLAUR	SERPINE1	9606.ENSP00000339328	9606.ENSP00000223095	0	0	0	0	0.162	0	0.9	0.989	0.999
PLAUR	SRPX2	9606.ENSP00000339328	9606.ENSP00000362095	0	0	0	0	0.076	0.213	0	0.947	0.958
PTTG1	TROAP	9606.ENSP00000377536	9606.ENSP00000257909	0	0	0	0	0.691	0	0	0.103	0.711
PTTG1	SGOL1	9606.ENSP00000377536	9606.ENSP00000263753	0	0	0	0	0.49	0	0	0.564	0.768
PTTG1	TK1	9606.ENSP00000377536	9606.ENSP00000301634	0	0	0	0	0.572	0	0	0.37	0.718
PTTG1	TYMS	9606.ENSP00000377536	9606.ENSP00000315644	0	0	0	0	0.817	0	0	0.381	0.881
PTTG1	UBE2C	9606.ENSP00000377536	9606.ENSP00000348838	0	0	0	0	0.935	0.27	0.3	0.706	0.989
PTTG1	RRM2	9606.ENSP00000377536	9606.ENSP00000353770	0	0	0	0	0.833	0	0	0.512	0.915
PTTG1	TTK	9606.ENSP00000377536	9606.ENSP00000358813	0	0	0	0	0.833	0	0	0.519	0.916
PTTG1	TOP2A	9606.ENSP00000377536	9606.ENSP00000411532	0	0	0	0	0.852	0	0	0.519	0.926
PTX3	TNFAIP6	9606.ENSP00000295927	9606.ENSP00000243347	0	0	0	0	0.147	0.417	0	0.977	0.988
RAB32	RAB38	9606.ENSP00000356465	9606.ENSP00000243662	0	0	0.444	0.964	0.069	0.685	0.9	0.876	0.969
RBP1	TTR	9606.ENSP00000232219	9606.ENSP00000237014	0	0	0	0	0.066	0	0.65	0.59	0.854
RBP1	RDH10	9606.ENSP00000232219	9606.ENSP00000240285	0	0	0	0	0.062	0.101	0.9	0.716	0.972
RBP1	STRA6	9606.ENSP00000232219	9606.ENSP00000456609	0	0	0	0	0	0	0.65	0.943	0.979
RDH10	STRA6	9606.ENSP00000240285	9606.ENSP00000456609	0	0	0	0	0	0	0	0.816	0.816
RPL39L	SEC61G	9606.ENSP00000296277	9606.ENSP00000388337	0	0	0	0	0.493	0.535	0	0.101	0.769
RRM2	SGOL1	9606.ENSP00000353770	9606.ENSP00000263753	0	0	0	0	0.765	0	0	0.195	0.802
RRM2	TK1	9606.ENSP00000353770	9606.ENSP00000301634	0	0	0	0	0.731	0	0	0.672	0.908
RRM2	SHCBP1	9606.ENSP00000353770	9606.ENSP00000306473	0	0	0	0	0.743	0	0	0.143	0.77
RRM2	TYMS	9606.ENSP00000353770	9606.ENSP00000315644	0	0	0	0	0.921	0.056	0	0.671	0.973
RRM2	UBE2C	9606.ENSP00000353770	9606.ENSP00000348838	0	0	0	0	0.921	0.062	0	0.561	0.964
RRM2	TTK	9606.ENSP00000353770	9606.ENSP00000358813	0	0	0	0	0.917	0	0	0.374	0.946
RRM2	TOP2A	9606.ENSP00000353770	9606.ENSP00000411532	0	0	0	0	0.935	0	0	0.671	0.978
RSPH4A	ZMYND10	9606.ENSP00000229554	9606.ENSP00000231749	0	0	0	0	0.087	0	0	0.724	0.737
RUNX1	THBS1	9606.ENSP00000300305	9606.ENSP00000260356	0	0	0	0	0.076	0	0.9	0	0.903
RUNX1	SOCS3	9606.ENSP00000300305	9606.ENSP00000330341	0	0	0	0	0.065	0	0.9	0.064	0.904
S100A8	S100A9	9606.ENSP00000357722	9606.ENSP00000357727	0	0	0	0.801	0.995	0.95	0.9	0.987	0.999
SAA1	TIMP1	9606.ENSP00000384906	9606.ENSP00000218388	0	0	0	0	0.084	0	0.9	0.369	0.937
SAA1	TTR	9606.ENSP00000384906	9606.ENSP00000237014	0	0	0	0	0.062	0	0.3	0.596	0.712
SAA1	VEGFA	9606.ENSP00000384906	9606.ENSP00000478570	0	0	0	0	0	0	0.9	0.342	0.931
SDC1	THBS1	9606.ENSP00000370542	9606.ENSP00000260356	0	0	0	0	0.096	0	0.6	0.935	0.974
SDC1	VEGFA	9606.ENSP00000370542	9606.ENSP00000478570	0	0	0	0	0.076	0	0	0.965	0.967
SEMA3A	VEGFA	9606.ENSP00000265362	9606.ENSP00000478570	0	0	0	0	0.062	0	0	0.764	0.769
SEMA3F	VEGFA	9606.ENSP00000002829	9606.ENSP00000478570	0	0	0	0	0.116	0.213	0	0.854	0.889
SERPINA1	TTR	9606.ENSP00000416066	9606.ENSP00000237014	0	0	0	0	0.178	0.142	0	0.799	0.845
SERPINE1	TIMP1	9606.ENSP00000223095	9606.ENSP00000218388	0	0	0	0	0.176	0	0	0.736	0.773
SERPINE1	VEGFA	9606.ENSP00000223095	9606.ENSP00000478570	0	0	0	0	0.076	0	0	0.71	0.72
SERPINE1	THBS1	9606.ENSP00000223095	9606.ENSP00000260356	0	0	0	0	0.273	0.059	0	0.655	0.744
SFRP2	WNT16	9606.ENSP00000274063	9606.ENSP00000222462	0	0	0	0	0.062	0.166	0.6	0.568	0.847
SFRP4	WNT16	9606.ENSP00000410715	9606.ENSP00000222462	0	0	0	0	0	0.166	0.6	0.618	0.861
SGOL1	UBE2C	9606.ENSP00000263753	9606.ENSP00000348838	0	0	0	0	0.666	0.076	0	0.229	0.741
SGOL1	SHCBP1	9606.ENSP00000263753	9606.ENSP00000306473	0	0	0	0	0.83	0	0	0	0.83
SGOL1	TOP2A	9606.ENSP00000263753	9606.ENSP00000411532	0	0	0	0	0.846	0	0	0.321	0.89
SGOL1	TTK	9606.ENSP00000263753	9606.ENSP00000358813	0	0	0	0	0.817	0	0	0.467	0.898
SGOL1	SKA1	9606.ENSP00000263753	9606.ENSP00000285116	0	0	0	0	0.811	0	0	0.577	0.916
SH2D2A	VEGFA	9606.ENSP00000376123	9606.ENSP00000478570	0	0	0	0	0	0	0.9	0.294	0.926
SHCBP1	SKA1	9606.ENSP00000306473	9606.ENSP00000285116	0	0	0	0	0.696	0	0	0.164	0.735
SHCBP1	TTK	9606.ENSP00000306473	9606.ENSP00000358813	0	0	0	0	0.741	0	0	0	0.741
SHCBP1	UBE2C	9606.ENSP00000306473	9606.ENSP00000348838	0	0	0	0	0.685	0	0	0.271	0.76
SHCBP1	TOP2A	9606.ENSP00000306473	9606.ENSP00000411532	0	0	0	0	0.889	0	0	0.151	0.901
SKA1	TTK	9606.ENSP00000285116	9606.ENSP00000358813	0	0	0	0	0.616	0	0	0.25	0.7
SKA1	TOP2A	9606.ENSP00000285116	9606.ENSP00000411532	0	0	0	0	0.622	0	0	0.367	0.75
SKA1	SPC24	9606.ENSP00000285116	9606.ENSP00000465075	0	0	0	0	0.371	0.192	0	0.608	0.784
SLAMF8	SLAMF9	9606.ENSP00000289707	9606.ENSP00000357072	0	0	0	0	0.065	0	0	0.744	0.751
SLC17A8	SLC18A3	9606.ENSP00000316909	9606.ENSP00000363229	0	0	0	0	0.069	0	0.8	0.824	0.964
SNAI1	TWIST1	9606.ENSP00000244050	9606.ENSP00000242261	0	0	0	0	0.064	0	0	0.93	0.932
SNAI1	VIM	9606.ENSP00000244050	9606.ENSP00000446007	0	0	0	0	0.062	0	0	0.791	0.795
SOCS1	SOCS3	9606.ENSP00000329418	9606.ENSP00000330341	0	0	0	0.739	0.129	0	0.8	0.925	0.862
SOCS1	SOCS2	9606.ENSP00000329418	9606.ENSP00000481249	0	0	0	0.778	0	0.496	0.9	0.862	0.957
SOCS2	SOCS3	9606.ENSP00000481249	9606.ENSP00000330341	0	0	0	0.771	0	0.334	0.9	0.812	0.943
SOCS3	VIM	9606.ENSP00000330341	9606.ENSP00000446007	0	0	0	0	0.076	0	0.9	0.153	0.914
SOD2	SOD3	9606.ENSP00000446252	9606.ENSP00000371554	0	0	0	0	0.112	0.744	0.9	0.785	0.994
SPC24	TTK	9606.ENSP00000465075	9606.ENSP00000358813	0	0	0	0	0.498	0.27	0	0.251	0.701
SPON2	THBS1	9606.ENSP00000483599	9606.ENSP00000260356	0	0	0	0	0.062	0	0.9	0.193	0.917
SPP1	THBS1	9606.ENSP00000378517	9606.ENSP00000260356	0	0	0	0	0.062	0	0.5	0.556	0.773
SPP1	TNFRSF11B	9606.ENSP00000378517	9606.ENSP00000297350	0	0	0	0	0.062	0	0	0.771	0.776
SPP1	VEGFA	9606.ENSP00000378517	9606.ENSP00000478570	0	0	0	0	0	0	0	0.86	0.86
SPRY1	SPRY4	9606.ENSP00000481675	9606.ENSP00000344967	0	0	0	0.895	0.096	0.182	0.9	0.761	0.925
STRA6	TTR	9606.ENSP00000456609	9606.ENSP00000237014	0	0	0	0	0	0	0.6	0.905	0.96
TACC3	TOP2A	9606.ENSP00000326550	9606.ENSP00000411532	0	0	0	0	0.694	0	0	0.222	0.752
TACC3	UBE2C	9606.ENSP00000326550	9606.ENSP00000348838	0	0	0	0	0.702	0	0	0.244	0.765
TACC3	TTK	9606.ENSP00000326550	9606.ENSP00000358813	0	0	0	0	0.898	0	0	0.229	0.918
TEAD2	TEAD4	9606.ENSP00000472109	9606.ENSP00000352926	0	0	0	0.962	0.14	0.708	0.6	0.778	0.893
TGFB2	VASN	9606.ENSP00000355896	9606.ENSP00000306864	0	0	0	0	0.088	0.281	0	0.58	0.7
THBS1	TNFAIP6	9606.ENSP00000260356	9606.ENSP00000243347	0	0	0	0	0.07	0.462	0	0.549	0.755
THBS1	VEGFA	9606.ENSP00000260356	9606.ENSP00000478570	0	0	0	0	0	0.27	0	0.895	0.92
TIMP1	VEGFA	9606.ENSP00000218388	9606.ENSP00000478570	0	0	0	0	0.085	0	0.5	0.74	0.87
TK1	UBE2C	9606.ENSP00000301634	9606.ENSP00000348838	0	0	0	0	0.738	0	0	0.392	0.834
TK1	TOP2A	9606.ENSP00000301634	9606.ENSP00000411532	0	0	0	0	0.725	0	0	0.477	0.85
TK1	TYMP	9606.ENSP00000301634	9606.ENSP00000379038	0.077	0	0	0	0	0	0.9	0.751	0.975
TK1	TYMS	9606.ENSP00000301634	9606.ENSP00000315644	0.169	0	0	0	0.787	0	0.9	0.798	0.995
TOP2A	TROAP	9606.ENSP00000411532	9606.ENSP00000257909	0	0	0	0	0.934	0	0	0.324	0.953
TOP2A	TYMS	9606.ENSP00000411532	9606.ENSP00000315644	0.111	0	0	0	0.83	0	0	0.685	0.948
TOP2A	UBE2C	9606.ENSP00000411532	9606.ENSP00000348838	0	0	0	0	0.982	0.06	0	0.624	0.993
TOP2A	TTK	9606.ENSP00000411532	9606.ENSP00000358813	0	0	0	0	0.949	0	0	0.552	0.976
TROAP	TTK	9606.ENSP00000257909	9606.ENSP00000358813	0	0	0	0	0.698	0	0	0.313	0.783
TROAP	UBE2C	9606.ENSP00000257909	9606.ENSP00000348838	0	0	0	0	0.821	0	0	0.284	0.866
TTK	TYMS	9606.ENSP00000358813	9606.ENSP00000315644	0	0	0	0	0.816	0	0	0.224	0.851
TTK	UBE2C	9606.ENSP00000358813	9606.ENSP00000348838	0	0	0	0	0.873	0	0	0.408	0.922
TUBA1C	TUBB6	9606.ENSP00000301072	9606.ENSP00000318697	0	0	0	0.919	0.21	0.746	0.8	0.478	0.958
[truncated: 4 more rows]
