# Supplementary material for: Characterization of Fatty Acid Metabolism-Related Genes Landscape for Predicting Prognosis and Aiding Immunotherapy in Glioma Patients
Source: Front Immunol. 2022 Jul 12;13:902143. doi: 10.3389/fimmu.2022.902143 (PMC9315048; doi:10.3389/fimmu.2022.902143)
Supplement: Supplementary Table 3 — 133 genes associated with prognosis after univariate cox analysis. [file Table_3.xlsx]

## Sheet: Sheet1
id	HR	HR.95L	HR.95H	pvalue
PTGDS	0.794724	0.741511	0.851756	8.15802e-11
ALDOA	1.835	1.58941	2.11853	1.22289e-16
GLUL	0.80294	0.726096	0.887916	1.902e-05
MIF	1.67475	1.34021	2.09281	5.74764e-06
ACADVL	1.52032	1.29439	1.78568	3.3336e-07
ENO2	0.616782	0.526981	0.721885	1.75229e-09
ALDH2	0.448474	0.397452	0.506046	1.02913e-38
TECR	1.52449	1.29582	1.7935	3.66882e-07
ACO2	0.486324	0.429093	0.551188	1.55577e-29
HSD17B4	0.56454	0.474241	0.672032	1.28191e-10
GABARAPL1	0.496576	0.427634	0.576631	4.33747e-20
UROS	0.47884	0.40465	0.566632	1.00401e-17
PDHA1	0.615778	0.488949	0.775507	3.77936e-05
ACAA1	1.89663	1.42829	2.51854	9.709e-06
PTGES2	0.613957	0.497542	0.75761	5.42317e-06
CPT1B	0.618105	0.496557	0.769406	1.65932e-05
LDHA	2.23237	2.01373	2.47474	1.20439e-52
ACSBG1	0.762621	0.68723	0.846283	3.35127e-07
ACAA2	2.83726	2.46296	3.26843	2.59754e-47
PRKAG2	0.465873	0.38635	0.561764	1.25786e-15
CBR1	1.85289	1.66003	2.06816	3.90181e-28
PTS	2.53181	2.12685	3.01388	1.52611e-25
GRHPR	0.530019	0.412531	0.680968	6.86611e-07
ACOT8	2.3844	1.89937	2.99329	6.95917e-14
SCP2	1.59294	1.35091	1.87834	3.07568e-08
ACSL6	0.528522	0.469023	0.595568	1.25614e-25
GAD2	0.796187	0.713102	0.888953	5.04913e-05
ACAT1	0.439317	0.356202	0.541826	1.50657e-14
ACSF2	1.54088	1.33197	1.78257	6.02362e-09
CA4	0.655917	0.58532	0.73503	3.91701e-13
ECI2	1.99162	1.68976	2.3474	2.11013e-16
FASN	0.45181	0.397872	0.513059	1.70682e-34
NDUFAB1	1.47837	1.2981	1.68366	3.80555e-09
PTGR2	0.404399	0.308438	0.530214	5.72557e-11
FAAH	0.50685	0.44806	0.573355	3.33634e-27
GGT1	0.37025	0.244102	0.56159	2.9463e-06
BPHL	1.544	1.25368	1.90156	4.36536e-05
ALAD	0.608819	0.512992	0.722547	1.35436e-08
MECR	1.56154	1.25871	1.93724	5.0845e-05
SLC27A3	2.04444	1.862	2.24475	7.92645e-51
PCBD1	2.28819	1.9064	2.74645	6.24898e-19
CD36	1.48166	1.33242	1.6476	3.90972e-13
HADH	1.49592	1.21301	1.84483	0.000166348
NUDT7	0.503721	0.419251	0.605209	2.43875e-13
PCCA	0.372803	0.314829	0.441453	2.58269e-30
UROD	2.98663	2.44824	3.64341	3.90104e-27
HIBCH	0.575554	0.433083	0.764894	0.000140656
HSD17B7	2.14968	1.73675	2.66079	2.03288e-12
ACACB	1.40173	1.19794	1.64019	2.51932e-05
ACSS1	0.697877	0.606633	0.802846	4.86441e-07
DECR2	1.65441	1.37079	1.99671	1.54572e-07
EPHX2	1.57019	1.35628	1.81785	1.55822e-09
PPT2	0.630985	0.480398	0.828776	0.000933184
AQP7	0.00274457	0.000777828	0.00968422	4.80343e-20
ACBD4	0.617496	0.51034	0.747151	7.14237e-07
GPX4	1.72517	1.44522	2.05933	1.57497e-09
PTGR1	2.56797	2.20234	2.9943	2.333e-33
ELOVL7	0.524903	0.42836	0.643204	5.11778e-10
ACADM	1.85549	1.52452	2.25833	6.98254e-10
LTA4H	1.60451	1.256	2.04973	0.000154189
DPEP1	1.56896	1.45164	1.69577	6.74365e-30
ALOX15B	1.26244	1.12532	1.41626	7.10591e-05
MAOA	0.766391	0.655062	0.89664	0.000892818
CRYZ	2.65384	2.28506	3.08215	1.97397e-37
SLC25A17	1.8036	1.35631	2.3984	4.99732e-05
ABCC1	1.67409	1.4302	1.95955	1.4163e-10
AADAT	0.478537	0.387926	0.590312	5.92526e-12
HPGDS	1.29569	1.11464	1.50615	0.000742751
ACSL4	0.627309	0.505146	0.779017	2.44603e-05
GPD1	1.23382	1.13074	1.34631	2.3568e-06
METAP1	1.97523	1.48744	2.62298	2.55408e-06
PTPRG	0.693704	0.579135	0.830937	7.16121e-05
TBXAS1	1.57509	1.36633	1.81575	3.78632e-10
CBR4	0.363161	0.297791	0.442881	1.46948e-23
NUDT19	6.27533	4.81704	8.1751	3.43291e-42
HCCS	4.14864	3.3667	5.1122	1.14967e-40
HMGCS1	0.564565	0.495692	0.643007	7.13885e-18
CROT	2.63531	2.26825	3.06176	9.57792e-37
ABCD1	2.71644	2.2702	3.25039	9.82821e-28
PLA2G4A	2.32277	1.98583	2.71689	5.68854e-26
ACBD7	0.671665	0.610931	0.738436	1.86262e-16
GCDH	0.472824	0.369521	0.605006	2.59584e-09
SLC25A20	2.30742	1.96577	2.70845	1.50793e-24
BMPR1B	0.694317	0.606018	0.795483	1.46491e-07
IDH3B	1.71672	1.30938	2.25078	9.21291e-05
HSD17B11	1.95836	1.63536	2.34515	2.70299e-13
PRKAB2	0.434311	0.339872	0.554992	2.61827e-11
UGDH	1.41563	1.17399	1.70701	0.000272879
PTGS1	1.96344	1.73709	2.21929	3.60125e-27
DLST	1.82888	1.47451	2.26841	3.93351e-08
DLD	1.4828	1.25135	1.75705	5.37609e-06
ELOVL1	1.59558	1.412	1.80303	6.77616e-14
FADS1	0.409175	0.353067	0.474199	1.5878e-32
NBN	0.662845	0.536887	0.818354	0.000131202
ACOX1	0.444784	0.353723	0.559286	4.15371e-12
RETSAT	1.86673	1.49218	2.3353	4.68888e-08
SUCLG2	2.22412	1.75131	2.82457	5.54818e-11
ERP29	2.98848	2.42374	3.68479	1.25365e-24
ELOVL2	1.47565	1.3385	1.62686	5.38118e-15
ADH5	3.10993	2.54357	3.8024	1.92331e-28
ADIPOR2	0.419575	0.346245	0.508436	7.89788e-19
SMS	3.60332	3.0694	4.23011	2.5904e-55
FH	2.2472	1.9099	2.64406	1.70864e-22
OSTC	2.31644	2.09219	2.56473	8.22967e-59
MAPKAPK2	2.24043	1.85274	2.70924	8.70948e-17
HADHB	0.431588	0.358973	0.518892	3.89811e-19
BLVRA	1.64437	1.35318	1.99821	5.68621e-07
IDH1	2.73418	2.27156	3.29102	2.04629e-26
HSDL2	0.707927	0.579238	0.865208	0.000739818
ALOX5AP	1.86854	1.70669	2.04573	1.1231e-41
EPHX1	0.667314	0.57417	0.775569	1.33854e-07
CA2	1.95578	1.7655	2.16658	9.24413e-38
ALDH9A1	0.714232	0.607606	0.83957	4.50836e-05
PSME1	1.82234	1.54922	2.14361	4.35636e-13
ELOVL5	1.42802	1.20247	1.69587	4.86322e-05
PON2	1.26411	1.11326	1.43541	0.000300531
FADS2	0.603176	0.539782	0.674015	4.536e-19
MDH2	2.50783	2.06991	3.03838	6.00177e-21
PTGES3	1.79669	1.49654	2.15705	3.32732e-10
SLC25A1	0.645663	0.54351	0.767017	6.41051e-07
UBE2L6	2.02519	1.71693	2.38879	5.47428e-17
HADHA	0.38304	0.304473	0.48188	2.54204e-16
PRDX6	1.60941	1.43293	1.80763	9.72132e-16
ECHS1	0.683901	0.550041	0.850338	0.000629124
ODC1	1.71792	1.50717	1.95812	5.33743e-16
HSD17B10	2.49859	2.07709	3.00563	2.621e-22
PPT1	2.20822	1.85024	2.63546	1.65729e-18
S100A10	1.54518	1.42831	1.67161	2.12211e-27
DBI	1.46423	1.2971	1.65288	6.96605e-10
SERINC1	0.494931	0.437421	0.560003	6.40416e-29
GPX1	1.94001	1.71866	2.18988	8.10783e-27
SCD	0.507181	0.460429	0.55868	4.52155e-43
SCD5	0.567661	0.519112	0.62075	2.21467e-35
