# Supplementary material for: Characterization of Fatty Acid Metabolism-Related Genes Landscape for Predicting Prognosis and Aiding Immunotherapy in Glioma Patients
Source: Front Immunol. 2022 Jul 12;13:902143. doi: 10.3389/fimmu.2022.902143 (PMC9315048; doi:10.3389/fimmu.2022.902143)
Supplement: Supplementary Table 4 — 10 genes were utilized to create a predictive risk score model. [file Table_4.xlsx]

## Sheet: Sheet1
id	coef
ACO2	-0.362466
PTGR1	0.246311
GPD1	0.127441
HCCS	0.411797
ABCD1	0.240618
RETSAT	0.326224
SMS	0.338848
CA2	0.202565
ELOVL5	0.256062
SCD	-0.429542
